# Supplementary material
Source: PubMed Central journal article supplement (PMC3938169)
Supplement: NIHMS544460-supplement-1_si_001.pdf [file NIHMS544460-supplement-1_si_001.pdf]

# Supporting Information

## Explorations of Substituted Urea Functionality for Discovery of New Activators of the Heme Regulated Inhibitor Kinase

*Ting Chen<sup>†\*\*</sup>, Khuloud Takroui<sup>†\*\*</sup>, Sung Hee-Hwang<sup>#</sup>, Sandeep Rana<sup>###</sup>, Revital Yefidoff-Freedman<sup>†</sup>, Jose Halperin<sup>†</sup>, Amarnath Natarajan<sup>###</sup>, Christophe Morisseau<sup>#</sup>, Bruce Hammock<sup>#</sup>, Michael Chorev<sup>†</sup>, Bertal H. Aktas,<sup>†\*</sup>*

<sup>†</sup> Hematology Laboratory for Translational Research, Department of Medicine, Brigham and Women's Hospital and Harvard Medical School, 75 Francis Street, Boston, MA 02115, USA

<sup>#</sup> Department of Entomology and University of California Davis Comprehensive Cancer Center, University of California, One Shields Avenue, Davis, California 95616

<sup>###</sup> Eppley Institute for Research in Cancer and Allied Diseases, University of Nebraska Medical Center, Omaha NE 68198

\* To whom correspondence should be addressed. Phone: (617) 525-3142. Fax: (617) 582-6069. E-mail: [huseyin\\_aktas@hms.harvard.edu](mailto:huseyin_aktas@hms.harvard.edu)

\*\* These authors contributed equally to this work.

### Table of Contents

|                                                                                                                                                                            |                     |
|----------------------------------------------------------------------------------------------------------------------------------------------------------------------------|---------------------|
| I. Table S1. Effect of agents on F/R ratio in the ternary complex assay.....                                                                                               | S2                  |
| II. Table S2: Activity of <i>N</i> -phenyl- <i>N'</i> -(4-((2,6-difluorobenzyl)oxy)cyclohexyl) ureas <b>II</b> , in the ternary complex and cell proliferation assay. .... | S44                 |
| III. Figure S1: Time response studies of the selected <i>N</i> -aryl, <i>N'</i> -cyclohexylarylureas in the surrogate eIF2 $\alpha$ phosphorylation assays. ....           | S46                 |
| IV. <sup>1</sup> H-NMR, <sup>13</sup> C-NMR and <sup>19</sup> F -NMR (if any) spectra for compounds <b>1-10</b> .....                                                      | S47                 |
| V. Structural confirmation data for the synthesized ureas: <b>I-11o</b> , <b>I-12o</b> , <b>I-14-20</b> and <b>III-1-5</b> .....                                           | S63                 |
| V.1. <sup>1</sup> H-NMR, <sup>13</sup> C-NMR and <sup>19</sup> F -NMR Spectra for compounds <b>I-11o</b> , <b>I-12o</b> , <b>I-14-20</b> and <b>III-1-5</b> .....          | S63                 |
| V.2. Mass confirmation data for compounds <b>I-11o</b> , <b>I-12o</b> , <b>I-14-20</b> and <b>III-1-5</b> .....                                                            | S85                 |
| VI. HPLC purity confirmation data for compounds <b>I-14-20</b> and <b>III-1-5</b> .....                                                                                    | <a href="#">S99</a> |

I. **Table S1.** Effect of agents on F/R ratio in the ternary complex assay.

| Mol_ID | Formula       | MolWeight | Origin        | Normalized F/R Fold Ratio (normalized to DMSO) |              |
|--------|---------------|-----------|---------------|------------------------------------------------|--------------|
|        |               |           |               | 33 $\mu$ M                                     | 10 $\mu$ M   |
| 2      | C23H38N2O3    | 390.559   | KIH-271-00-2  | 1.20715108                                     | 1.049791243  |
| 6      | C22H38N2O3    | 378.549   | KIH-271-41    | 1.271459453                                    | 1.125531824  |
| 7      | C34H58N4O2    | 554.85    | KIH-271-24 B  | 1.029022708                                    | -1.120683604 |
| 10     | C19H34N2O3    | 338.485   | KIH-271-53    | 1.002897901                                    | -1.038022774 |
| 11     | C22H38N2O2    | 362.549   | KIH-271-55 B  | 1.055001455                                    | 1.099896937  |
| 12     | C23H42N2O2    | 378.592   | KIH-271-61    | 1.33299008                                     | 1.060198905  |
| 13     | C23H38N2O3    | 390.559   | KIH-271-11    | 1.089668569                                    | -1.032227733 |
| 15     | C23H32N2O3    | 384.512   | KIH-271-01    | -1.256846431                                   | -1.029811398 |
| 16     | C20H36N2O2    | 336.512   | KIH-258-96    | 1.975743565                                    | -1.135501372 |
| 18     | C22H36N2O5    | 408.532   | KIH-258-92    | -1.038246611                                   | 1.086463393  |
| 23     | C29H50N2O5    | 506.718   | KIH-271-13    | -1.211665514                                   | 1.01128348   |
| 24     | C20H36N2O2    | 336.512   | KIH-258-98    | 2.523315074                                    | -1.023009769 |
| 25     | C20H36N2O2    | 336.512   | KIH-271-02    | 1.115285408                                    | 1.086978378  |
| 26     | C20H36N2O2    | 336.512   | KIH-271-03    | -1.17567983                                    | -1.23493713  |
| 27     | C20H36N2O2    | 336.512   | KIH-258-99    | -1.075537537                                   | -1.021620663 |
| 29     | C18H28N2O3    | 320.427   | KIH-271-11-A  | 1.02011574                                     | -1.023301487 |
| 30     | C13H22N2O2    | 238.326   | KIH-258-98-OH | -1.254473531                                   | -1.173004229 |
| 31     | C14H24N2O2    | 252.353   | KIH-258-96-OH | -1.017620058                                   | -1.054205139 |
| 32     | C15H26N2O2    | 266.379   | KIH-271-02-OH | 1.130878288                                    | -1.193033957 |
| 33     | C16H28N2O2    | 280.406   | KIH-271-03-OH | 1.12973756                                     | 1.044301803  |
| 34     | C17H30N2O2    | 294.432   | KIH-258-75-OH | -1.031636046                                   | 1.006342763  |
| 35     | C16H26N2O3    | 294.389   | KIH-271-13    | -1.028833853                                   | -1.045843694 |
| 36     | C12H22N2O3    | 242.315   | KIH-258-83    | 1.226092797                                    | 1.134050032  |
| 720    | C20H26N2O2    | 326.433   | KIH-271-30B   | -1.181140812                                   | -1.237317991 |
| 729    | C3H6N2O       | 86.0925   | Aldrich       | 1.098347529                                    | -1.014538954 |
| 730    | C7H6N2O       | 134.135   | Aldrich       | -1.001880328                                   | 1.14306097   |
| 731    | C4H8N2O       | 100.119   | Aldrich       | -1.092887235                                   | -1.083114159 |
| 732    | C16H10N2O2    | 262.263   | Aldrich       | 1.269612712                                    | 1.091870643  |
| 735    | C11H20ClF6N2P | 360.707   | Aldrich       | -1.004338899                                   | -1.071706635 |
| 736    | C10H8N2       | 156.184   | Aldrich       | -1.041999366                                   | -1.109831841 |
| 737    | C11H8N2O      | 184.194   | Aldrich       | 1.106404164                                    | -1.17278931  |
| 738    | C7H13NO       | 127.184   | Aldrich       | -1.03002608                                    | 1.10073912   |
| 739    | C13H10O3      | 214.217   | Aldrich       | -1.095212622                                   | -1.099434974 |
| 740    | C14H10N2O2    | 238.241   | Aldrich       | -1.042992668                                   | 1.013471079  |
| 742    | C14H12O2      | 212.244   | Aldrich       | -1.097167137                                   | -1.001166252 |
| 743    | C15H14O       | 210.271   | Aldrich       | -1.033114871                                   | 1.038469225  |
| 744    | C15H17N3      | 239.316   | Aldrich       | -1.099632513                                   | -1.052317273 |
| 747    | C13H15NO6     | 281.261   | MG-XXXI-37B   | -1.158368808                                   | 1.058712367  |
| 748    | C14H14OS      | 230.325   | MG-XXXI-67A   | -1.017519313                                   | 1.105990699  |

|     |                 |         |                          |              |              |
|-----|-----------------|---------|--------------------------|--------------|--------------|
| 749 | C2H8NO2PS       | 141.129 | Chem Service (Monitor)   | -1.017457607 | 1.0987501    |
| 750 | C4H10NO3PS      | 183.166 | Chem Service (acephate)  | -1.02971787  | 1.007411614  |
| 752 | C22H30Cl2N10    | 505.447 | Aldrich (chlorohexidine) | 1.781518283  | 1.101221782  |
| 753 | C14H29NO        | 227.386 | DLD-01-41-127A           | -1.1601148   | -1.025669015 |
| 762 | C13H22N2O       | 222.327 | MG-XXXII-44B             | -1.276508735 | -1.108041141 |
| 763 | C9H14O2         | 154.206 | BB-01                    | -1.126408909 | 1.057241821  |
| 765 | C17H17NO        | 251.323 | MG-XXXIII-60D            | 1.838115105  | 1.256461614  |
| 766 | C13H29NO2S      | 263.44  | MG-XXXIII-96B            | 1.149715379  | -1.00843112  |
| 767 | C19H33NO2S      | 339.536 | MG-XXXIV-66B             | -1.340086208 | -1.160244979 |
| 769 | C12H26          | 170.335 | Aldrich                  | -1.112573175 | -1.117756164 |
| 770 | C12H25Br        | 249.231 | Aldrich                  | 1.11987533   | 1.29294881   |
| 774 | C19H41NO2S      | 347.599 | MG-XXXIV-80B             | 1.001938054  | 1.10319167   |
| 775 | C16H35NO2S      | 305.52  | MG-XXXIV-81B             | -1.086025178 | 1.119301328  |
| 776 | C12H17NO2S      | 239.334 | MG-XXXIV-85A             | -1.961615949 | -1.217655745 |
| 777 | C14H16N2O2      | 244.289 | JRS                      | -1.05531291  | 1.145317639  |
| 778 | C15H31N2OP      | 286.393 | JRS-09-01A               | -1.280142062 | 1.049169256  |
| 779 | C7H8Cl2NO3P     | 256.023 | TM-1 (Toru)              | 1.01730921   | 1.108990784  |
| 780 | C8H10Cl2NO3P    | 270.05  | TM-2                     | 1.003382154  | 1.169502917  |
| 781 | C9H12Cl2NO3P    | 284.076 | TM-3                     | -1.01681899  | 1.14111761   |
| 782 | C10H14Cl2NO3P   | 298.103 | TM-4                     | -1.064667936 | -1.070755352 |
| 783 | C10H14Cl2NO3P   | 298.103 | TM-5                     | 1.125552127  | -1.003608486 |
| 784 | C11H16Cl2NO3P   | 312.129 | TM-6                     | -1.423034861 | -1.10678313  |
| 785 | C11H16Cl2NO3P   | 312.129 | TM-7                     | 1.074400209  | 1.037771717  |
| 786 | C11H15Cl2O4P    | 313.114 | TM-8                     | -1.123965199 | 1.139662876  |
| 787 | C11H25NO2S      | 235.387 | Cri-48.8-A               | 1.029522982  | -1.084363594 |
| 789 | C12H26N2        | 198.348 | Cri-54.8-A               | 1.0139561    | -1.255868705 |
| 790 | C12H24O2        | 200.318 | CM-02-7                  | -1.04401583  | 1.070949922  |
| 791 | C17H21N2O       | 396.266 | CW-87-KY                 | 3.515050779  | 1.057976008  |
| 792 | C13H16Cl2N2O2   | 303.184 | CW-25-KY                 | -1.264591648 | -1.297957457 |
| 793 | C15H21BrN2O     | 325.244 | CW-13-KY                 | 1.354132709  | 1.007516758  |
| 794 | C14H15Cl2F3N2O  | 355.183 | CW-20-KY                 | 1.042398381  | 1.152018628  |
| 795 | C14H16ClF3N2O   | 320.738 | CW-31-KY                 | 1.045875684  | -1.088791494 |
| 796 | C14H15BrClF3N2O | 399.634 | CW-19-KY                 | 1.058307061  | -1.171965848 |
| 797 | C13H15Cl3N2O    | 321.63  | CW-67-KY                 | 1.328754821  | 1.060712229  |
| 798 | C15H20Br2N2O    | 404.14  | CW-16-KY                 | 1.152771188  | 1.275480398  |
| 799 | C13H16ClFN2O    | 270.73  | CW-40-KY                 | -1.203411045 | -1.278915457 |
| 800 | C13H16Cl2N2O    | 287.185 | CW-68-KY                 | -1.017989831 | 1.063943     |
| 801 | C13H16Cl2N2O    | 287.185 | CW-74-KY                 | 1.054717075  | 1.035224268  |
| 802 | C14H18ClN3O3    | 311.764 | CW-22-KY                 | 1.033839802  | -1.157278325 |
| 803 | C19H30N2O       | 302.454 | CW-99-KY                 | -1.123746254 | 1.003554585  |
| 804 | C18H28N2O       | 288.428 | CW-56-KY                 | -1.047361133 | 1.088831536  |
| 805 | C14H14N2O       | 226.274 | CW-7-KY                  | 1.338734437  | 1.180251304  |
| 806 | C14H14N2O2      | 242.273 | CW-11-KY                 | 1.065408226  | 1.109845661  |
| 807 | C15H16N2O3      | 272.299 | CW-10-KY                 | 1.035723823  | -1.06022033  |
| 808 | C13H10Cl2N2O    | 281.137 | CW-8-KY                  | 6.016378159  | 1.109333863  |

|     |                |         |              |              |              |
|-----|----------------|---------|--------------|--------------|--------------|
| 809 | C15H16N2O      | 240.3   | CW-9-KY      | 1.273204041  | 1.062157907  |
| 810 | C14H13CIN2O    | 260.719 | CW-6-KY      | 1.117345958  | -1.097037206 |
| 811 | C14H13CIN2O2   | 276.718 | CW-3-KY      | -1.034908495 | -1.091085605 |
| 812 | C13H10CI2N2O   | 281.137 | CW-2-KY      | 1.221477048  | -1.034598889 |
| 813 | C15H16N2O3     | 272.299 | CW-12-KY     | 1.237568174  | -1.34203136  |
| 814 | C15H31NO       | 241.413 | BDH          | 1.077284046  | 1.080552617  |
| 815 | C16H33NO       | 255.439 | BDH          | -1.184710104 | 1.039810469  |
| 816 | C21H41NO       | 323.556 | CM-18.7-A    | 1.04819186   | 1.097562459  |
| 817 | C22H43NO       | 337.583 | CM-18.7-B    | -1.079641214 | 1.273018068  |
| 818 | C22H43NO       | 337.583 | CM-18.7-C    | -1.075352313 | -1.234255022 |
| 819 | C23H45NO       | 351.61  | CM-18.7-D    | -1.071169396 | -1.011640877 |
| 820 | C23H45NO       | 351.61  | CM-18.7-E    | 1.14967251   | 1.110306094  |
| 821 | C24H45NO       | 363.62  | CM-18.7-F    | -1.185471906 | -1.039253607 |
| 824 | C17H34N2O2     | 298.464 | CM-30.7-A    | -1.338483827 | 1.068437377  |
| 825 | C20H40N2O2     | 340.544 | CM-27.7-A    | 1.087943454  | 1.004093858  |
| 826 | C18H37NO2      | 299.492 | CM-29.7-A    | 1.193042792  | 1.239919737  |
| 828 | C10H22N2O2     | 202.294 | MG-XXXII-12A | 1.037036408  | 1.228582646  |
| 829 | C16H33BrN2O    | 349.35  | MG-XXXII-15A | 3.36423696   | 1.023340045  |
| 832 | C9H8N4OS       | 220.251 | Chem service | 1.047074837  | 1.217585227  |
| 843 | C14H10F2N2O2   | 276.238 | Y1-01        | 1.48366487   | 1.200939833  |
| 844 | C15H12F2N2O2   | 290.265 | Y1-02        | 1.096274567  | 1.017703559  |
| 845 | C16H14F2N2O2   | 304.291 | Y1-03        | 1.24002205   | 1.267407921  |
| 846 | C17H16F2N2O2   | 318.318 | Y1-05        | 1.106010949  | -1.290771277 |
| 847 | C18H18F2N2O2   | 332.345 | Y1-07        | 1.063174869  | -1.018150678 |
| 848 | C20H22F2N2O2   | 360.398 | Y1-08        | -1.070243986 | 1.016589341  |
| 849 | C26H34F2N2O2   | 444.557 | Y1-11        | 1.00861173   | -1.127664661 |
| 850 | C20H13BrF2N2O2 | 431.23  | Y1-43        | -1.014175671 | 1.187168091  |
| 851 | C16H14F2N2O3   | 320.291 | Y1-12        | 1.08561339   | 1.023088615  |
| 852 | C21H16F2N2O3   | 382.36  | Y1-14        | -1.02244703  | -1.107843924 |
| 853 | C21H15CIF2N2O3 | 416.805 | Y1-15        | 1.264238874  | -1.028067374 |
| 854 | C22H18F2N2O3   | 396.387 | Y1-16        | 1.084307164  | -1.452338127 |
| 855 | C22H17CIF2N2O3 | 430.832 | Y1-17        | -1.150741365 | -1.103619438 |
| 856 | C23H20F2N2O3   | 410.413 | Y1-18        | -1.096532155 | -1.006162732 |
| 857 | C24H22F2N2O3   | 424.44  | Y1-19        | -1.005914618 | -1.011463322 |
| 858 | C14H9F3N2O2    | 294.229 | Y1-48        | 1.207777785  | 1.112844084  |
| 91  | C15H21CIN2O4   | 328.791 | KIH-237-09   | -1.713145772 | -1.091161787 |
| 92  | C16H23CIN2O3   | 326.818 | KIH-237-12   | 1.055658342  | 1.088340261  |
| 93  | C15H22CIN3O3   | 327.806 | KIH-237-49   | -1.659548837 | -1.222938189 |
| 94  | C14H20CIN3O3   | 313.78  | KIH-237-24   | -1.072336194 | -1.127900895 |
| 96  | C16H24CIN3O2   | 325.834 | KIH-237-48   | -1.041961569 | -1.021212857 |
| 97  | C15H23CIN4O2   | 326.822 | KIH-237-51   | 1.189140204  | -1.451839282 |
| 98  | C16H23CIN2O3   | 326.818 | KIH-237-15   | -1.499334109 | -1.017650136 |
| 99  | C16H24CIN3O2   | 325.834 | KIH-237-52   | -1.003585643 | 1.294369878  |
| 100 | C14H20CIN3O3   | 313.78  | KIH-237-46   | -1.591798123 | -1.031170828 |
| 101 | C13H10CI2N2O   | 281.137 | KIH-237-14   | 1.267454349  | 1.389474749  |

|     |              |         |             |              |              |
|-----|--------------|---------|-------------|--------------|--------------|
| 103 | C16H30N2O3   | 298.421 | KIH-237-22  | -1.201951058 | 1.101972547  |
| 104 | C12H15CIN2O3 | 270.712 | KIH-237-19  | 1.032874986  | 1.166581882  |
| 105 | C12H22N2O3   | 242.315 | KIH-237-23  | -1.127910944 | -1.070307099 |
| 108 | C15H22CIN3O3 | 327.806 | KIH-237-40' | -1.459980944 | -1.141259658 |
| 109 | C24H42N2O3   | 406.602 | KIH-237-59  | 1.058405026  | 1.038792096  |
| 110 | C26H44N2O3   | 432.639 | KIH-237-60  | 1.056698872  | 1.122019637  |
| 111 | C30H45CIN2O3 | 517.143 | KIH-237-61  | 1.023403529  | -1.110227505 |
| 112 | C26H46N2O3   | 434.655 | KIH-237-62  | -1.057338068 | 1.24386277   |
| 113 | C25H44N2O3   | 420.628 | KIH-237-63  | -1.2382528   | 1.039773814  |
| 115 | C33H54N2O3   | 526.793 | KIH-237-65  | 1.048784678  | -1.047857325 |
| 116 | C34H48N2O3   | 532.757 | KIH-237-66  | -1.022996339 | -1.255092856 |
| 117 | C26H42N2O3   | 430.623 | KIH-237-68  | -1.031132448 | -1.032305174 |
| 118 | C20H34N2O3   | 350.496 | KIH-237-71  | 1.048426108  | 1.123591051  |
| 120 | C17H34N2O    | 282.465 | KIH-237-73  | 1.089837125  | 1.089984352  |
| 121 | C26H47N3O2   | 433.67  | KIH-237-77  | 1.202744143  | -1.269661241 |
| 122 | C25H45N3O2   | 419.644 | KIH-237-76  | 1.045873506  | 1.30623158   |
| 124 | C21H16F21NO2 | 713.324 | KIH-237-79  | -1.050496831 | -1.140539318 |
| 125 | C21H37NO2    | 335.524 | KIH-237-80  | 1.061677611  | -1.011419489 |
| 126 | C16H22N2O3   | 290.357 | JRS         | -1.048416987 | -1.008524189 |
| 127 | C29H51N3O7   | 553.731 | Blankfield  | 1.00953468   | -1.190791142 |
| 128 | C27H48N2O3   | 448.682 | KIH-258-08  | -1.188817417 | -1.216939665 |
| 130 | C27H48N2O3   | 448.682 | KIH-258-10  | -1.126834906 | -1.085184466 |
| 131 | C27H48N2O3   | 448.682 | KIH-258-12  | -1.262798091 | -1.009580426 |
| 132 | C30H46N2O3   | 482.698 | KIH-237-98  | -1.116726281 | 1.010393145  |
| 133 | C23H38N2O5   | 422.558 | KIH-237-95  | 1.357918409  | 1.190643908  |
| 134 | C15H24N2O3   | 280.363 | KIH-237-92  | -1.016254291 | -1.014857024 |
| 137 | C16H22CINO4  | 327.803 | KIH-237-93  | 1.159911879  | -1.374002505 |
| 138 | C25H30N2O3   | 406.517 | KIH-258-18  | 1.179983738  | -1.053167488 |
| 139 | C17H23CIO4   | 326.815 | KIH-237-94  | 1.029880703  | 1.054574503  |
| 140 | C16H21CIO5   | 328.788 | KIH-237-96  | 1.024429074  | 1.208398892  |
| 142 | C25H30N2O5   | 438.516 | KIH-258-20  | 1.299193111  | -1.182833359 |
| 143 | C23H29N3O3   | 395.495 | KIH-258-28  | 1.309681722  | 1.862690098  |
| 144 | C13H16CINO4  | 285.723 | KIH-258-01  | -1.166350323 | 1.023633974  |
| 147 | C21H35NO3    | 349.507 | KIH-258-35  | 1.049601359  | 1.063659876  |
| 148 | C33H54N2O3   | 526.793 | KIH-258-37  | 1.046031034  | 1.02082198   |
| 149 | C24H41N3O4   | 435.6   | KIH-258-34  | -1.004862786 | -1.01287397  |
| 150 | C21H35NO3    | 349.507 | KIH-258-32  | 1.043481387  | 1.070354234  |
| 151 | C26H30N2O4   | 434.527 | KIH-258-74  | -1.0381418   | 1.06352488   |
| 157 | C29H38N4O7   | 554.635 | JP-435      | 1.194990301  | -1.100557716 |
| 159 | C24H33N3O4   | 427.537 | KIH-258-47  | 1.11980127   | 1.119323668  |
| 160 | C16H25CIN2O2 | 312.835 | KIH-258-45  | -1.338761784 | -1.225508763 |
| 162 | C25H34N2O5   | 442.548 | KIH-258-55  | 1.350909374  | 1.21247148   |
| 164 | C26H34N2O5   | 454.559 | KIH-258-68  | 1.281993031  | -1.026999664 |
| 167 | C13H24N2O3   | 256.341 | KIH-258-85  | -1.03325785  | -1.119291749 |
| 170 | C19H30N2O5   | 366.452 | KIH-258-89  | 1.135412775  | 1.083759383  |

|     |             |         |                  |              |              |
|-----|-------------|---------|------------------|--------------|--------------|
| 171 | C21H34N2O5  | 394.505 | KIH-258-91       | -1.019243875 | -1.090319027 |
| 172 | C7H8N2S     | 152.217 | Aldrich          | -1.136673988 | 1.128991966  |
| 177 | C10H20N2S4  | 296.539 | Disulfiram Sigma | 1.214899105  | 1.225971636  |
| 178 | C13H24N2S   | 240.408 | MG-XXX-73B       | -1.284830811 | -1.184877929 |
| 180 | C14H20N2S   | 248.387 | MG-XXXV-17A      | 1.780562607  | 1.357594208  |
| 181 | C16H24N2S   | 276.44  | MG-XXXIV-54B     | -1.374090275 | -1.310942094 |
| 187 | CH4N2O      | 60.0553 | Aldrich          | 1.053831087  | 1.078137416  |
| 188 | C2H2N3NaO   | 107.047 | Aldrich          | 1.166542311  | 1.01329589   |
| 190 | C7H8N2O     | 136.151 | Aldrich          | -1.027937994 | -1.0044169   |
| 191 | C3H8N2O     | 88.1084 | Aldrich          | -1.323798663 | 1.203488237  |
| 193 | C5H12N2O    | 116.162 | Aldrich          | -1.153826097 | -1.046523592 |
| 195 | C7H16N2O    | 144.215 | DLD-01-31-140A   | -1.035105929 | -1.111282183 |
| 196 | C7H16N2O    | 144.215 | Aldrich          | 1.297750075  | 1.13290404   |
| 197 | C7H12N2O    | 140.183 | Aldrich          | -1.038520256 | 1.015766433  |
| 198 | C9H20N2O    | 172.268 | CM-42-6-A        | -1.20095504  | 1.001884424  |
| 199 | C8H18N2O3   | 190.24  | DD-01-31-151A    | -1.002156065 | -1.011166429 |
| 200 | C11H24N2O3  | 232.32  | DD-01-31-104A    | 1.093069486  | 1.14007917   |
| 201 | C15H30N2O   | 254.411 | MG-XXXII-54A     | 1.178460293  | -1.000717888 |
| 202 | C16H32N2O   | 268.438 | MG-XXXII-9A      | 1.488905656  | 1.020977328  |
| 203 | C9H20N2O    | 172.268 | MG-XXXIII-35A    | 1.123455634  | 1.034134752  |
| 204 | C11H24N2O   | 200.321 | MG-XXXII-42B     | -1.076427886 | 1.044100242  |
| 205 | C17H36N2O   | 284.481 | MG-XXXII-34A     | -1.154617871 | 1.007150571  |
| 206 | C19H34N2O   | 306.486 | MG-XXXII-78B     | -1.124591045 | 1.192768686  |
| 207 | C7H16N2O    | 144.215 | MG-XXXII-10A     | 1.017995019  | 1.055483826  |
| 208 | C8H18N2O    | 158.241 | MG-XXX-13A       | -1.117180533 | 1.10918952   |
| 209 | C8H18N2O2   | 174.241 | MG-XXXII-23A     | -1.074414627 | -1.181554962 |
| 210 | C11H24N2O   | 200.321 | MG-XXXI-6B       | 1.092067938  | -1.090087134 |
| 211 | C12H26N2O   | 214.348 | MG-XXXI-39A      | -1.236159995 | -1.150094508 |
| 212 | C13H20N2O   | 220.311 | DD-01-31-17A     | -1.122367557 | 1.034998434  |
| 213 | C17H22N2O   | 270.369 | DD-01-31-129A    | 1.117114725  | 1.162291117  |
| 214 | C13H19CIN2O | 254.756 | DD-01-31-33A     | 3.000206858  | 1.149734854  |
| 215 | C9H20N2O    | 172.268 | MG-XXXI-11C      | 1.077568915  | -1.00698457  |
| 216 | C10H22N2O   | 186.294 | MG-XXX-33A       | -1.257623511 | -1.056202459 |
| 217 | C11H24N2O   | 200.321 | DD-01-31-110A    | -1.100294848 | 1.021302734  |
| 218 | C12H26N2O   | 214.348 | MG-XXXII-98A     | -1.208781512 | 1.136885076  |
| 219 | C12H24N2O   | 212.332 | MG-XXXIII-12A    | 1.019725744  | 1.09289635   |
| 220 | C14H30N2O   | 242.401 | MG-XXXI-55A      | -1.01352121  | -1.065419865 |
| 222 | C15H32N2O   | 256.427 | DD-01-31-81A     | -1.05541425  | -1.009267137 |
| 223 | C15H29N3O   | 267.41  | MG-XXXV-32A      | -1.002886174 | -1.020089353 |
| 224 | C15H31N3O2  | 285.426 | MG-XXXV-33A      | -1.256674052 | -1.193576223 |
| 225 | C13H26N2O   | 226.358 |                  | 1.031207445  | 1.003348901  |
| 227 | C15H30N2O   | 254.411 | DD-01-31-174A    | -1.075139747 | -1.011443367 |
| 228 | C15H24N2O   | 248.364 | DD-01-31-30A     | 1.036514391  | -1.196779001 |
| 229 | C15H23CIN2O | 282.809 | DD-01-31-46A     | 3.266865254  | -1.186383277 |
| 230 | C13H28N2O   | 228.374 | MG-XXXII-83A     | 1.113174557  | 1.140507617  |

|     |              |         |               |              |              |
|-----|--------------|---------|---------------|--------------|--------------|
| 232 | C12H26N2O    | 214.348 | MG-XXX-11B    | -1.114341425 | -1.05831702  |
| 233 | C13H28N2O    | 228.374 | MG-XXX-14A    | 1.334274802  | -1.117576924 |
| 234 | C14H30N2O    | 242.401 | MG-XXX-38A    | -1.036692325 | -1.153857366 |
| 235 | C17H34N2O    | 282.465 | DD-01-31-175A | 1.084627062  | 1.056084507  |
| 236 | C17H28N2O    | 276.417 | DD-01-31-31A  | 1.163099876  | -1.169257267 |
| 237 | C17H27CIN2O  | 310.862 | DD-01-31-47A  | 4.134380891  | -1.133085769 |
| 238 | C15H32N2O    | 256.427 | MG-XXXIII-82A | -1.140696924 | 1.045451059  |
| 239 | C16H34N2O    | 270.454 | MG-XXXIV-57A  | -1.102371529 | -1.063562512 |
| 241 | C16H34N2O    | 270.454 | MG-XXXIV-92A  | 1.092155177  | -1.103385533 |
| 242 | C17H36N2O    | 284.481 | MG-XXXIV-83A  | -1.019881143 | 1.303515268  |
| 243 | C15H31BrN2O  | 335.323 | MG-XXXV-20A   | 3.597921293  | -1.057027719 |
| 244 | C16H34N2O    | 270.454 | MG-XXXIII-25A | 1.131687987  | -1.001518288 |
| 245 | C16H32N2O    | 268.438 | MG-XXXII-88B  | 1.047852784  | 1.15228709   |
| 246 | C16H30N2O    | 266.422 | MG-XXXIV-55A  | 1.069180789  | 1.096356799  |
| 247 | C17H36N2O    | 284.481 | MG-XXXV-27A   | -1.080581963 | 1.089540684  |
| 248 | C17H36N2O    | 284.481 | MG-XXXIII-83A | -1.164866519 | -1.042298163 |
| 249 | C18H38N2O    | 298.507 | MG-XXXIV-79A  | 1.188913696  | -1.01876037  |
| 250 | C18H38N2O    | 298.507 | MG-XXXIV-73A  | 1.094054412  | 1.03362761   |
| 251 | C15H29CIN2O2 | 304.856 | MG-XXXIV-56A  | 1.058354794  | 1.111959023  |
| 252 | C15H30N2O4   | 302.41  | MG-XXXV-19A   | 1.0336549    | 1.112885479  |
| 253 | C17H36N2O    | 284.481 | MG-XXXII-56A  | 1.184572926  | 1.018696241  |
| 254 | C18H38N2O    | 298.507 | MG-XXXV-26A   | 1.185367798  | 1.124931898  |
| 255 | C19H40N2O    | 312.534 | MG-XXXIV-68A  | -1.060462611 | -1.137026772 |
| 256 | C21H44N2O    | 340.587 | MG-XXXIV-76A  | -1.09978107  | -1.071491567 |
| 258 | C17H34N2O    | 282.465 | MG-XXXIII-94B | -1.00252355  | 1.111711883  |
| 259 | C18H36N2O    | 296.491 | MG-XXXIV-90A  | -1.073878456 | -1.093305168 |
| 260 | C16H34N2O    | 270.454 | MG-XXXII-11A  | -1.165930414 | 1.057631363  |
| 261 | C16H33CIN2O  | 304.899 | MG-XXXII-28A  | 4.274192497  | 1.037124169  |
| 262 | C17H36N2O    | 284.481 | MG-XXXIV-26A  | 1.263245523  | -1.028137119 |
| 263 | C18H38N2O    | 298.507 | MG-XXXIV-58A  | -1.069208086 | 1.088434649  |
| 264 | C15H32N2O    | 256.427 | CM-36-6       | -1.002023953 | 1.269495033  |
| 265 | C16H34N2O    | 270.454 | DLD-01-41-9B  | -1.11992503  | -1.100910492 |
| 267 | C17H36N2O    | 284.481 | CM-36-6       | 1.101308081  | 1.077944654  |
| 268 | C18H38N2O    | 298.507 | DLD-01-41-10B | 1.0373133    | -1.08532503  |
| 271 | C19H40N2O    | 312.534 | CM-36-6       | -1.196173864 | -1.141998949 |
| 272 | C19H38N2O    | 310.518 | MG-XXXII-55A  | 1.093247568  | 1.09319927   |
| 273 | C22H44N2O    | 352.598 | MG-XXXIV-62B  | -1.056745597 | -1.008086959 |
| 275 | C9H18N2O     | 170.252 | DD-01-31-147A | 1.029709543  | 1.002985742  |
| 276 | C9H18N2O     | 170.252 | DD-01-17G     | 1.118336731  | -1.001515422 |
| 277 | C8H16N2O2    | 172.225 | MG-XXXIII-76A | 1.110999827  | 1.105598459  |
| 378 | C14H17N3O    | 243.304 | MG-XXX-82A    | 1.196827848  | -1.101011235 |
| 379 | C15H20N2O2   | 260.332 | MG-XXXI-52A   | 1.052328989  | 1.02094865   |
| 380 | C15H20N2O2   | 260.332 | BDH25         | 1.025077196  | -1.501980803 |
| 381 | C14H18N2O3   | 262.304 | JRS-01-08     | -2.499108368 | -1.266256406 |
| 382 | C16H24N2O    | 260.375 | MG-XXX-69A    | 1.426529963  | 1.09105049   |

|     |             |         |               |              |              |
|-----|-------------|---------|---------------|--------------|--------------|
| 383 | C17H26N2O   | 274.401 | DD-01-31-179A | 4.884153299  | 1.349087918  |
| 384 | C17H26N2O   | 274.401 | MG-XXX-81A    | 2.85719759   | 1.259143829  |
| 385 | C19H30N2O   | 302.454 | MG-XXXIII-91B | -1.078807234 | -1.36868778  |
| 386 | C13H17FN2O  | 236.285 | MG-XXX-65A    | -1.086242219 | -1.137609917 |
| 387 | C13H17CIN2O | 252.74  | MG-XXX-15A    | -1.0701542   | 1.087469283  |
| 388 | C14H19CIN2O | 266.766 | BH-147-10-02  | 1.015394319  | 1.006633872  |
| 389 | C15H21CIN2O | 280.793 | MG-XXXII-75B  | 1.110435357  | -1.061892239 |
| 390 | C13H17CIN2O | 252.74  | DD-01-09E     | 1.146004651  | -1.013302029 |
| 391 | C14H19CIN2O | 266.766 | DD-01-31-35A  | 3.93785068   | -1.041225532 |
| 393 | C13H17IN2O  | 344.191 | MG-XXX-48B    | -1.121114638 | 1.099876126  |
| 394 | C13H19N3O   | 233.309 | MG-XXXIII-17A | 1.084561599  | -1.01887832  |
| 395 | C14H21N3O   | 247.336 | MG-XXXII-90A  | -1.055489062 | -1.045089432 |
| 396 | C15H23N3O   | 261.363 | MG-XXXII-77A  | 1.074577228  | 1.362267939  |
| 397 | C13H17N3O3  | 263.292 | MG-XXX-32B    | 1.271273939  | -1.150522612 |
| 278 | C10H20N2O   | 184.279 | MG-XXX-29A    | -1.092731402 | -1.00906254  |
| 279 | C9H16N2O3   | 200.235 | MG-XXXIV-86A  | -1.046575881 | -1.091103713 |
| 280 | C9H17N3O2   | 199.25  | MG-XXXIV-97A  | -1.045534521 | -1.065936762 |
| 281 | C9H15F3N2O  | 224.223 | MG-XXXV-15A   | 1.102705137  | -1.03729663  |
| 282 | C10H20N2O   | 184.279 | DD-01-08D     | 1.149008661  | 1.00804096   |
| 283 | C11H22N2O   | 198.305 | MG-XXXIII-87A | 1.059581242  | -1.007896478 |
| 284 | C12H24N2O   | 212.332 | MG-XXXV-25A   | -1.306266763 | -1.152037218 |
| 285 | C11H22N2O   | 198.305 | MG-XXXI-16A   | 1.042896156  | -1.125867579 |
| 286 | C11H22N2O   | 198.305 | MG-XXX-40A    | 1.027901438  | 1.21098818   |
| 287 | C10H18N2O   | 182.263 | MG-XXX-92A    | -1.120959318 | 1.043505728  |
| 288 | C10H16N2O   | 180.247 | MG-XXXIII-21A | -1.081396865 | -1.044733458 |
| 289 | C9H15N3O    | 181.235 | MG-XXXIII-71A | 1.045766248  | 1.176836604  |
| 290 | C11H22N2O   | 198.305 | MG-XXXI-88A   | 1.01047435   | 1.132655454  |
| 291 | C11H23N3O   | 213.32  | MG-XXXI-14A   | -1.031890275 | 2.044770901  |
| 292 | C15H30N2O   | 254.411 | MG-XXXII-33A  | -1.096180128 | -1.049034204 |
| 293 | C10H20N2O2  | 200.278 | MG-XXX-46A    | -1.016132816 | -1.007459751 |
| 294 | C12H26IN3O  | 355.259 | MG-XXXII-27A  | -1.084666774 | -1.035623207 |
| 295 | C16H29N3O3  | 311.42  | BDH21         | -1.102200121 | 1.127677308  |
| 296 | C16H30N4O2  | 310.435 | BDH20         | -1.004947169 | 1.245754518  |
| 297 | C13H26N2O3  | 258.357 | DD-01-31-167A | -1.130368266 | 1.079104596  |
| 298 | C10H18N2O3  | 214.262 | MG-XXXIV-47A  | -1.04564932  | 1.021939432  |
| 299 | C13H24N2O3  | 256.341 | MG-XXXIII-65A | 1.006508362  | -1.113218539 |
| 300 | C10H18N2O3  | 214.262 | MG-XXXI-29A   | -1.070245078 | 1.073679718  |
| 301 | C11H20N2O3  | 228.288 | MG-XXXV-10B   | -1.194937644 | 1.129769277  |
| 302 | C14H27N3O3  | 285.382 | MG-XXXI-59A   | -1.078798342 | -1.110931744 |
| 303 | C11H20N2O3  | 228.288 | MG-XXXIV-99A  | 1.147009853  | 1.159537296  |
| 304 | C12H24N2O   | 212.332 | MG-XXXIV-12A  | -1.180345865 | 1.022832557  |
| 306 | C13H26N2O2  | 242.358 | MG-XXXII-26B  | 1.011159599  | -1.088013315 |
| 307 | C13H24N2O3  | 256.341 | MG-XXX-52A    | -1.212034231 | -1.223075243 |
| 308 | C13H23N3O   | 237.341 | MG-XXXI-50A   | -1.000445887 | 1.197516769  |
| 309 | C14H28N2O   | 240.385 | MG-XXXIV-10A  | 1.020103597  | 1.225213891  |



|     |             |         |               |              |              |
|-----|-------------|---------|---------------|--------------|--------------|
| 310 | C14H26N2O3  | 270.368 | MG-XXXV-9A    | 1.030462183  | 1.202604325  |
| 311 | C15H28N2O3  | 284.394 | MG-XXXV-11A   | -1.066593628 | 1.048574487  |
| 312 | C16H30N2O3  | 298.421 | MG-XXXV-13A   | 1.090041927  | 1.026398223  |
| 313 | C16H32N2O   | 268.438 | MG-XXXIII-72A | 1.220386856  | -1.11352783  |
| 314 | C18H34N2O3  | 326.474 | MG-XXXIV-98A  | 1.111438542  | -1.126319653 |
| 315 | C19H36N2O3  | 340.501 | MG-XXXV-5B    | -1.040887922 | 1.253168572  |
| 316 | C18H35N3O2  | 325.489 | MG-XXXV-18B   | -1.000244478 | -1.004997607 |
| 317 | C19H38N2O   | 310.518 | CM-29-5       | 1.030376512  | 1.084251059  |
| 318 | C19H36N2O3  | 340.501 | MG-XXX-64B    | -1.063515354 | 1.027949513  |
| 319 | C23H42N2O   | 362.592 |               | -1.012325028 | 1.025511402  |
| 320 | C20H40N2O   | 324.544 | MG-XXXII-47A  | 1.036044581  | 1.233402062  |
| 321 | C21H42N2O   | 338.571 | MG-XXXIII-80A | -1.018294838 | 1.015690713  |
| 322 | C11H20N2OS  | 228.354 | MG-XXX-50A    | -1.089291805 | 1.013218293  |
| 323 | C10H18N2O   | 182.263 | MG-XXX-89A    | -1.047736082 | 1.265751969  |
| 324 | C11H20N2O   | 196.289 | MG-XXXI-41A   | -1.132428954 | 1.096038588  |
| 325 | C12H22N2O   | 210.316 | MG-XXX-24A    | -1.336776099 | 1.032549543  |
| 326 | C12H23N3O   | 225.331 | MG-XXXII-35A  | 1.012459413  | -1.141932302 |
| 327 | C13H24N2O2  | 240.342 | MG-XXXIII-13A | 1.128758755  | 1.269252215  |
| 329 | C14H26N2O   | 238.369 | MG-XXXIV-24A  | 1.055115689  | 1.028570489  |
| 330 | C14H26N2O   | 238.369 | MG-XXXIV-49A  | -1.294580216 | 1.145031604  |
| 331 | C14H26N2O   | 238.369 | MG-XXX-53A    | -1.017707686 | 1.14734508   |
| 332 | C15H28N2O   | 252.396 | MG-XXXII-69B  | 1.329485197  | 1.339883525  |
| 333 | C15H26N2O   | 250.38  | MG-XXXII-68A  | 1.354743619  | 1.172057639  |
| 334 | C12H20N4O   | 236.313 | MG-XXXIII-23A | -1.030957476 | 1.465391427  |
| 335 | C8H14N6O    | 210.236 | MG-XXXIV-5B   | -1.003737344 | -1.171768675 |
| 336 | C15H23N3O   | 261.363 | MG-XXXIII-50A | 1.01956067   | -1.062271586 |
| 337 | C14H27N3O2  | 269.383 | MG-XXXII-84A  | -1.118748527 | 1.024883487  |
| 338 | C17H32N2O   | 280.449 | MG-XXXII-79A  | 1.315170277  | 1.404069794  |
| 340 | C15H28N2O   | 252.396 | MG-XXX-54A    | -1.110118288 | 1.132415298  |
| 341 | C19H36N2O   | 308.502 | MG-XXXI-40A   | -1.111258516 | 1.047169051  |
| 342 | C14H24N2O   | 236.353 | MG-XXXIV-33B  | 1.114900637  | 1.125560046  |
| 343 | C17H28N2O   | 276.417 | BH-147-10-01  | 1.065637683  | 1.240852405  |
| 345 | C19H32N2O   | 304.47  | MG-XXXII-61B  | -1.03320461  | 1.162459452  |
| 346 |             |         | DD-01-06B     | -1.042107613 | 1.075250393  |
| 347 | C13H18N2O   | 218.295 | MG-XXX-16A    | -1.084500278 | -1.125747518 |
| 348 | C15H22N2O   | 246.348 | MG-XXXIII-33A | -1.092362016 | -1.010359265 |
| 349 | C14H20N2O   | 232.321 | CM-26.5-01    | 1.034321861  | -1.025684324 |
| 350 | C15H23N2OS- | 279.421 | MG-XXXIV-37A  | -1.017515894 | 1.373664197  |
| 351 | C15H22N2O   | 246.348 | MG-XXXIV-38A  | 1.128099419  | 1.012875484  |
| 352 | C16H23N3O   | 273.373 | BDH24         | -1.031856225 | 1.094328653  |
| 353 | C13H19N3O   | 233.309 | MG-XXXIV-39B  | -1.094720537 | 1.10223119   |
| 354 | C18H30N2O   | 290.444 | MG-XXXIII-36A | -1.076060744 | -1.058575049 |
| 355 | C14H20N2O   | 232.321 | DD-01-31-19A  | 1.16811498   | 1.109467071  |
| 356 | C16H24N2O   | 260.375 | MG-XXXV-28A   | 1.009780791  | -1.026286443 |
| 357 | C16H24N2O   | 260.375 | MG-XXXIII-70B | -1.110219196 | 1.336192194  |

|     |              |         |                        |              |              |
|-----|--------------|---------|------------------------|--------------|--------------|
| 358 | C15H22N2O    | 246.348 | MG-XXX-35A             | 1.346964599  | 1.356053219  |
| 359 | C16H24N2O    | 260.375 | MG-XXXI-7A             | 1.005149278  | 1.061989561  |
| 360 | C17H26N2O    | 274.401 | MG-XXXI-5A             | -1.000180022 | -1.089249497 |
| 362 | C13H19N3O    | 233.309 | MG-XXXI-80A            | 1.21878741   | -1.001054765 |
| 363 | C17H24N2O    | 272.385 | MG-XXXIII-29A          | 1.004511612  | 1.008074781  |
| 364 | C17H20N2O    | 268.354 | MG-XXX-63A             | -1.202695275 | -1.497104792 |
| 365 | C17H20N2O2   | 284.353 | MG-XXXIV-31B           | 1.163187951  | -1.028790088 |
| 366 | C17H20N2O2   | 284.353 | MG-XXXIV-35A           | -1.044904608 | -1.152686729 |
| 367 | C17H20N2O2   | 284.353 | MG-XXXIV-78A           | 3.775231861  | -1.107544461 |
| 368 | C20H21N3O    | 319.4   | MG-XXXIV-64A           | -2.658393599 | -1.445511338 |
| 369 | C18H22N2O    | 282.38  | DD-01-31-131A          | -1.280418721 | -1.224118581 |
| 371 | C20H22N2O2   | 322.401 | MG-XXXI-64A            | 2.67352039   | -1.032075399 |
| 372 | C14H20N2O    | 232.321 | MG-XV-22A              | -1.210515983 | 1.059724933  |
| 373 | C14H17F3N2O  | 286.293 | MG-XXXIV-72C           | -1.138507002 | -1.038563082 |
| 374 | C14H17F3N2O  | 286.293 | MG-XXXIV-94A           | 1.612445818  | -1.226804971 |
| 375 | C14H20N2O2   | 248.321 | MG-XXX-70A             | -1.335394078 | 1.22123265   |
| 376 | C17H26N2O3   | 306.4   | MG-XXXIII-14A          | -1.030879142 | 1.141403473  |
| 377 | C14H17F3N2O2 | 302.292 | MG-XXXII-24A           | 1.14558593   | -1.054923999 |
| 398 | C14H19N3O3   | 277.319 | MG-XXXII-22C           | 1.056332181  | 1.162253652  |
| 399 | C13H18N2O2   | 234.294 | MG-XXXI-60A            | 1.111980966  | 1.039948028  |
| 400 | C14H20N2O2   | 248.321 | JRS                    | -1.033109427 | 1.13109154   |
| 401 | C13H18N2O4S  | 298.358 | MG-XXXI-13A            | -1.032718734 | 1.163489725  |
| 402 | C13H19N3O3S  | 297.373 | MG-XXXI-56B            | 1.01489324   | 1.101135723  |
| 403 | C14H20N2O    | 232.321 | Chem-Service (Siduron) | -1.226303289 | -1.298606431 |
| 404 | C21H32N2O    | 328.492 | CM-11-6                | 1.048125789  | 1.069197776  |
| 405 | C22H34N2O    | 342.518 | CM-11-6                | 1.056449092  | 1.010079798  |
| 406 | C23H40N2O    | 360.577 | CM-11-6                | 1.142995409  | -1.000629919 |
| 407 | C20H28N2O    | 312.449 | MG-XXXIII-37A          | 1.369786506  | 1.146977564  |
| 408 | C11H22N2O    | 198.305 | MG-XXXII-46A           | 1.018705621  | -1.050464556 |
| 409 | C9H12N2O     | 164.204 | Lancaster              | 1.045912244  | 1.031908467  |
| 411 | C13H18N2O3   | 250.294 | MG-XXXIII-44A          | -1.503730975 | 1.030106521  |
| 412 | C14H20N2O3   | 264.32  | MG-XXXI-71B            | -1.106796021 | 1.145913578  |
| 413 | C13H20N2O3   | 252.31  | DD-01-31-23A           | 1.022010077  | 1.015589613  |
| 414 | C15H24N2O3   | 280.363 | DD-01-31-24A           | 1.032675489  | 1.107867189  |
| 416 | C14H14N2O    | 226.274 | CM-10.6-01             | -1.145278716 | -1.143964413 |
| 417 | C15H16N2O    | 240.3   | Aldrich                | 1.079103965  | 1.089035539  |
| 418 | C17H20N2O    | 268.354 | Aldrich                | -1.016215894 | 1.062706874  |
| 419 | C15H16N2O    | 240.3   | DD-01-31-20A           | 1.100638454  | 1.100450242  |
| 420 | C16H18N2O    | 254.327 | MG-XXXII-92B           | -1.232530233 | 1.298635798  |
| 422 | C10H14N2O2   | 194.23  | DD-01-31-21A           | -1.112119951 | 1.255469736  |
| 423 | C15H14N2O3   | 270.283 | DD-01-31-28A           | -1.103745119 | -1.120411889 |
| 424 | C16H18N2O    | 254.327 | MG-XXXIII-68A          | -1.006222883 | 1.020965765  |
| 425 | C16H22N2O    | 258.359 | MG-XXXIII-69A          | 1.079343981  | -1.056296682 |
| 426 | C12H18N2O    | 206.284 | BH-147-10-08           | -1.096057665 | -1.022534434 |
| 427 | C16H18N2O    | 254.327 | OH-1                   | 1.191368192  | 1.028138366  |

|     |                 |         |                            |              |              |
|-----|-----------------|---------|----------------------------|--------------|--------------|
| 428 | C18H22N2O       | 282.38  | OH-3                       | 1.059405203  | 1.116271305  |
| 429 | C19H24N2O       | 296.407 | OH-5                       | -1.053829857 | 1.018954671  |
| 430 | C15H15FN2O      | 258.291 | OH-7                       | -1.261520319 | 1.043528354  |
| 431 | C15H14Cl2N2O    | 309.19  | OH-9                       | 2.394487737  | 1.213464178  |
| 432 | C16H17FN2O      | 272.317 | OH-11                      | 1.069471937  | 1.368935349  |
| 433 | C16H20N2OS      | 288.408 | OH2                        | 1.135674923  | 1.138565185  |
| 434 | C18H24N2OS      | 316.461 | OH-4                       | -1.081567114 | -1.138774781 |
| 435 | C19H26N2OS      | 330.488 | OH-6                       | 1.164512643  | 1.127821332  |
| 436 | C15H17FN2OS     | 292.372 | OH-8                       | -1.15166738  | -1.32546923  |
| 437 | C15H16Cl2N2OS   | 343.271 | OH-10                      | 1.83745733   | 1.053083159  |
| 438 | C16H19FN2OS     | 306.398 | OH-12                      | 1.102079564  | -1.007973373 |
| 439 | C11H16N2O       | 192.258 | MG-XXXV-12C                | -1.018097755 | 1.071751203  |
| 440 | C13H20N2O2      | 236.31  | DD-01-31-181A              | 1.133551625  | -1.10786706  |
| 441 | C16H26N2O3      | 294.389 | DD-01-31-183A              | 1.221936461  | 1.003378659  |
| 442 | C18H22N2O       | 282.38  | DD-01-31-180A              | 2.628109914  | 1.115321892  |
| 447 | C8H8ClN3O       | 197.622 | MG-XXXIII-60A              | -1.046796832 | -1.021237635 |
| 448 | C10H13ClN2O2    | 228.675 | DD-01-31-37A               | 1.210570865  | -1.019704703 |
| 449 | C9H11ClN2O      | 198.649 | BH-147-10-04               | -1.16775165  | 1.078070381  |
| 452 | C13H19ClN2O3    | 286.755 | DD-01-31-39A               | -1.362762343 | -1.006990989 |
| 454 | C15H23ClN2O3    | 314.808 | DD-01-31-40A               | -1.238428163 | 1.033431263  |
| 459 | C26H36Cl2N4O2   | 507.496 | BDH-reaction 2             | 1.092420621  | -1.092240398 |
| 460 | C13H17ClN2O3    | 284.739 | BDH-reaction 17            | 1.390153976  | -1.183835025 |
| 461 | C16H16Cl2N4O2   | 367.23  | BDH-reaction 16            | -1.0316018   | 1.136085727  |
| 463 | C15H15ClN2O     | 274.745 | DD-01-31-36A               | -1.324058245 | -1.27334708  |
| 464 | C13H10Cl2N2O    | 281.137 | CM-10.6-02                 | 1.363015538  | 1.186726693  |
| 466 | C13H8Cl4N2O     | 350.027 | CM-10.6-03                 | 10.49066094  | 1.876917079  |
| 467 | C8H8Cl2N2O      | 219.068 | MG-XXX-43B                 | 1.102590647  | 1.085069719  |
| 472 | C14H12Cl2N2O2   | 311.163 | BH-147-10-09               | 1.027307383  | 1.054117407  |
| 473 | C19H14Cl2N2O2   | 373.233 | BH-147-10-10               | -1.071150342 | 1.182100322  |
| 474 | C15H16N4O3      | 300.313 | MG-XXXIII-46A              | -1.021041401 | -1.093838922 |
| 475 | C14H13N3O4      | 287.271 | MG-XXXIII-47B              | 1.139713266  | -1.049295728 |
| 476 | C13H10N4O5      | 302.242 | Aldrich                    | 1.148905564  | -1.093982274 |
| 477 | C12H12N2O       | 200.236 | DLD-01-41-16B              | -1.10124666  | 1.02177492   |
| 478 | C13H14N2O       | 214.263 | BH-147-10-07               | -1.11637146  | 1.003055481  |
| 479 | C14H16N2O       | 228.29  | DLD-01-41-18B              | 1.298307605  | 1.084274414  |
| 481 | C15H18N2O3      | 274.315 | DLD-01-31-135A             | -1.265865397 | -1.024843764 |
| 486 | C19H24N2O       | 296.407 | DLD-01-31-132A             | -1.395362527 | -1.030983088 |
| 491 | C10H14N2O       | 178.231 | DD-01-31-148A              | -1.058503346 | -1.206798661 |
| 492 | C12H18N2O       | 206.284 | DD-01-31-116A              | 1.040309106  | -1.10172225  |
| 493 | C14H17ClN2O2    | 280.75  | DLD-01-41-29B              | 1.094150998  | 1.227979808  |
| 495 | C8H8N2O2        | 164.161 | Lancaster                  | -1.021922922 | 1.100057635  |
| 497 | C14H9ClF2N2O2   | 310.683 |                            | 1.193253786  | -1.002395743 |
| 498 | C20H9Cl3F5N3O3  | 540.655 | Chlorfluazuron (Shuo Wang) | 2.458359772  | 1.055432081  |
| 499 | C21H10Cl2F6N2O3 | 523.212 | Fluofenoxuron (Shuo Wang)  | 4.047409251  | -1.088028364 |

|     |                |         |                           |              |              |
|-----|----------------|---------|---------------------------|--------------|--------------|
| 500 | C17H7Cl2F9N2O3 | 529.141 | Lufenuron (Shuo Wang)     | 2.277756398  | -1.172101204 |
| 501 | C14H6Cl2F4N2O2 | 381.109 | Teflubenzuron (Shuo Wang) | -1.01733144  | 1.134705467  |
| 506 | C5H11NO2       | 117.146 | MG-XXXII-41C              | -1.244809791 | 1.073655411  |
| 508 | C10H21NO2      | 187.279 | DD-01-240                 | -1.01696379  | 1.094212471  |
| 509 | C12H25NO2      | 215.332 | DLD-01-41-22B             | -1.071107999 | 1.09693969   |
| 510 | C12H25NO2      | 215.332 | CM-08-6                   | -1.168649057 | -1.052254395 |
| 511 | C15H31NO2      | 257.412 | MG-XXXIV-29A              | -1.023525718 | -1.104513993 |
| 512 | C16H33NO2      | 271.439 | MG-XXXIV-30A              | -1.018010437 | 1.177363533  |
| 513 | C16H33NO2      | 271.439 | MG-XXXV-53A               | 1.08957139   | 1.120595913  |
| 514 | C16H23N3O2     | 289.373 | Eserine Aldrich           | -1.035057114 | -1.001274858 |
| 515 | C14H29NO2      | 243.386 | DLD-01-41-21B             | 1.016422748  | -1.034972749 |
| 517 | C13H23NO2      | 225.327 | DD-01-14J                 | 1.274002039  | 1.049166091  |
| 518 | C15H20N2O3     | 276.331 | MG-XXXIII-53A             | 1.043240273  | 1.104164597  |
| 522 | C13H16ClNO2    | 253.725 | DLD-01-41-37B             | -1.094077496 | 1.086535988  |
| 523 | C16H23NO2      | 261.359 | MG-XXXIII-27A             | 1.326693925  | -1.002171137 |
| 524 | C17H31NO2      | 281.434 | DLD-01-41-42B             | 1.496084561  | -1.008786673 |
| 525 | C12H21NO2      | 211.301 | DLD-01-41-46B             | 1.170530255  | 1.196691033  |
| 526 | C17H25NO2      | 275.386 | MG-XXXI-84A               | 1.165644642  | 1.370715305  |
| 527 | C17H24N2O4     | 320.383 | MG-XXXI-87A               | 1.148933756  | 1.123965517  |
| 529 | C17H19NO2      | 269.338 | MG-XXXV-22A               | 3.056337362  | 1.144339866  |
| 532 | C17H31NO2      | 281.434 | DLD-01-41-39B             | 1.116138207  | 1.138969717  |
| 533 | C18H21NO2      | 283.365 | DLD-01-41-40B             | 1.035943026  | 1.239157468  |
| 535 | C21H23NO2      | 321.413 | BDH Carbamate             | 1.118954825  | 1.041152818  |
| 536 | C22H23NO2      | 333.424 | DLD-01-41-41B             | 1.242415646  | -1.014558729 |
| 537 | C9H17NO2       | 171.237 | DLD-01-41-26B             | -1.029062664 | -1.141672135 |
| 538 | C8H9NO2        | 151.163 | DD-01-22M                 | -1.047646516 | 1.037004533  |
| 540 | C16H17NO2      | 255.312 | MG-XXXIII-45A             | -1.1206731   | 1.006993435  |
| 541 | C14H12ClNO2    | 261.704 | CM-26.5-02                | 1.460104454  | 1.42331471   |
| 543 | C14H12ClNO2    | 261.704 | CM-26.5-04                | -1.086259687 | 1.057807218  |
| 544 | C12H11NO2      | 201.221 | DLD-01-41-19B             | -1.165998758 | 1.056891544  |
| 545 | C2H2N2O2       | 86.0495 | MG-XXXII-41D              | 1.072253533  | -1.042450187 |
| 546 | C8H15NO3       | 173.21  | MG-XXXIII-60B             | -1.051021896 | 1.042483503  |
| 547 | C14H29NO       | 227.386 | MG-XXXIII-65A             | 3.019428832  | 1.276808776  |
| 548 | C20H39NO       | 309.53  | MG-XXXII-98A              | 1.759578446  | 1.39700963   |
| 549 | C14H26F3NO     | 281.358 | MG-XXXIV-11B              | 1.209658462  | 1.14496708   |
| 550 | C16H33NO       | 255.439 | MG-XXXV-23A               | 1.003542269  | -1.049554919 |
| 551 | C8H18N2O       | 158.241 | MG-XXXV-12A               | 1.00801866   | 1.095463536  |
| 553 | C13H27NO       | 213.36  | Cri-51.8-A                | 1.151210979  | 1.234373804  |
| 554 | C11H23NOS      | 217.371 | CEW                       | -1.095957778 | 1.007032547  |
| 555 | C12H25NOS      | 231.398 | Cri-55.8-A                | -1.041114821 | 1.160149345  |
| 556 | C11H23NOS      | 217.371 | CEW                       | 1.107736518  | -1.05872469  |
| 557 | C15H31NO       | 241.413 | MG-XXXIV-40B              | -1.006691256 | -1.017813693 |
| 558 | C17H35NO       | 269.466 | TFS-011701-1              | 1.090982943  | -1.031313304 |
| 559 | C17H35NO       | 269.466 | MG-XXXV-55A               | -1.078405488 | 1.048480071  |

|     |             |         |               |              |              |
|-----|-------------|---------|---------------|--------------|--------------|
| 560 | C12H25NO2   | 215.332 | MG-XXXIV-42B  | -1.020594022 | 1.070767329  |
| 561 | C13H27NO2   | 229.359 | MG-XXXIV-53B  | 1.165857656  | 1.021120727  |
| 562 | C12H26N2O   | 214.348 | Cri-24.8-A    | -1.055969245 | 1.020743226  |
| 563 | C14H28N2O2  | 256.384 | Cri-25.8-A    | 1.157756218  | 1.303818656  |
| 564 | C16H34N2O   | 270.454 | MG-XXXV-12B   | -1.015210895 | 1.021287258  |
| 566 | C14H28CINO  | 261.831 | MG-XXXIV-63B  | -1.039700452 | -1.04719939  |
| 567 | C19H39NO    | 297.519 | MG-XXXIV-67B  | -1.095905299 | 1.075403779  |
| 568 | C18H37NO    | 283.492 | CM-08-6       | 1.026651103  | 1.014635187  |
| 570 | C18H35NO    | 281.477 | CM-08-6       | -1.24428945  | 1.124776202  |
| 571 | C18H35NO2   | 297.476 | CM52.7A       | 1.054919361  | -1.011509125 |
| 572 | C21H41NO2   | 339.556 | CM 53.7A      | 1.270719042  | 1.02216466   |
| 573 | C21H43NO2   | 341.572 | Aldrich       | 1.457170779  | -1.153121148 |
| 574 | C18H33NO    | 279.461 | CM-08-6       | -1.414353444 | 1.007415332  |
| 575 | C19H37NO    | 295.503 | CM-08-6       | 1.076842389  | -1.009150027 |
| 577 | C18H31NO    | 277.445 | CM-08-6       | 1.141385259  | 1.006051997  |
| 578 | C18H31NO    | 277.445 | CM-08-6       | 1.136102895  | 1.375334872  |
| 579 | C18H33NO    | 279.461 | CM-08-6       | 1.022798501  | 1.015153006  |
| 580 | C22H37NO    | 331.535 | CM-08-6       | 3.42624563   | 1.01760648   |
| 581 | C22H33NO    | 327.504 | CM-08-6       | 1.10635568   | 1.257358861  |
| 583 | C18H35NO2   | 297.476 | CM-26-6       | 1.0583479    | 1.239411969  |
| 584 | C18H37NO3   | 315.491 | CM-18-6       | -1.007684776 | 1.085293165  |
| 588 | C7H13NO     | 127.184 | MG-XXXIV-16A  | 1.036430672  | 1.250443412  |
| 589 | C8H15NO     | 141.211 | MG-XXXV-31A   | -1.027850728 | -1.006890525 |
| 592 | C13H23NO    | 209.328 | MG-XXXII-74A  | -1.073912534 | 1.055065331  |
| 593 | C14H25NO    | 223.354 | MG-XXXI-77B   | -1.026922612 | 1.027329108  |
| 594 | C14H25NO    | 223.354 | MG-XXXII-76B  | -1.08395795  | 1.037220654  |
| 595 | C13H17NO    | 203.28  | MG-XXXIV-18B  | -1.229574488 | 1.111734368  |
| 596 | C20H41NO2   | 327.545 | CM-61-6       | 1.52774807   | 1.17627358   |
| 597 | C19H39NO2   | 313.518 | CM-62-6       | 4.76670948   | 1.002294046  |
| 598 | C15H21NO2   | 247.333 | JRS           | 1.014048     | 1.119488859  |
| 599 | C14H19NO2   | 233.306 | JRS           | 1.048686851  | 1.125228836  |
| 600 | C15H21NO    | 231.333 | MG-XXXIV-06A  | -1.142114377 | -1.15630842  |
| 602 | C15H21NO    | 231.333 | MG-XXXIV-13B  | 1.007539855  | 1.119418898  |
| 603 | C15H19NO    | 229.317 | MG-XXXIV-82B  | 1.399186841  | 1.236814764  |
| 604 | C14H19NO    | 217.307 | MG-XXXIV-19A  | 1.012227074  | 1.007812734  |
| 605 | C17H25NO    | 259.387 | MG-XXXII-95A  | 1.043659135  | -1.005219823 |
| 606 | C17H25NO    | 259.387 | MG-XXXIII-6A  | 1.059127599  | -1.084462372 |
| 607 | C17H25NO    | 259.387 | MG-XXXIII-90A | -1.288711352 | 1.032018873  |
| 608 | C9H9NO      | 147.174 | MG-XXXIV-48B  | 1.031646967  | 1.011621962  |
| 609 | C13H11NO    | 197.233 | Aldrich       | -1.013724126 | 1.094998137  |
| 610 | C14H13NO    | 211.259 | MG-XXXIV-21A  | -1.000910186 | -1.008318225 |
| 611 | C17H19NO    | 253.339 | MG-XXXIII-92B | 1.052411212  | -1.273784973 |
| 614 | C6H13NO2S   | 163.238 | MG-XV-22A     | -1.143397469 | 1.010186127  |
| 621 | C13H16CINOS | 269.79  | MG-XXX-5B     | 7.02367346   | 1.819317112  |
| 622 | C13H23NOS   | 241.393 | MG-XXX-21A    | 1.982950915  | 1.768511825  |

|      |                |         |                                                     |              |              |
|------|----------------|---------|-----------------------------------------------------|--------------|--------------|
| 623  | C13H16ClNOS    | 269.79  | MG-XXX-49B                                          | 1.430400302  | 1.053909392  |
| 633  | C17H16F2N2O2   | 318.318 | Y1-04                                               | 1.223164678  | 1.104152001  |
| 634  | C18H18F2N2O2   | 332.345 | Y1-06                                               | -1.09109492  | -1.05961143  |
| 635  | C22H26F2N2O2   | 388.451 | Y1-10                                               | 1.009566218  | -1.050419581 |
| 636  | C20H14F2N2O3   | 368.334 | Y1-13                                               | -1.102997171 | 1.045731398  |
| 637  | C21H23F2N3O2S  | 419.488 | Y1-28                                               | -1.406995388 | -1.276924083 |
| 638  | C15H9F2N3O2    | 301.248 | Y1-36                                               | 1.093859879  | 1.015952827  |
| 639  | C20H14F2N2O2   | 352.334 | Y1-42                                               | 1.281761346  | -1.022703788 |
| 640  | C14H8ClF3N2O2  | 328.674 | Y2-01                                               | 1.161029623  | -1.019878056 |
| 641  | C17H16Cl2N2O2  | 351.227 | Y3-04                                               | 1.010246488  | 1.080907126  |
| 642  | C18H18Cl2N2O2  | 365.254 | Y3-06                                               | 2.182820096  | 1.139120867  |
| 2015 | C17H28N2O2     | 292.416 | Atrazine - Chemservice                              | -1.117377852 | -1.084178301 |
| 2016 | C26H36N2O4     | 440.575 | Simazine - Chemservice                              | 1.064835056  | 1.065559497  |
| 2017 | C24H32N2O4     | 412.522 | Simetryn                                            | 1.179895974  | -1.218309208 |
| 2018 | C24H31N3O2     | 393.522 | Cyanuric acid                                       | -1.242783437 | 1.00530512   |
| 2019 | C21H21F3N2O5   | 438.397 | Propazine                                           | -1.402476279 | -1.25087205  |
| 2020 | C21H21F3N2O5   | 438.397 | Ametryn                                             | 1.008795195  | -1.297642349 |
| 2021 | C21H22N2O6     | 398.409 | Prometryn                                           | -1.408905092 | -1.326407437 |
| 2022 | C23H32FN3O     | 385.518 | 2-chloro-4-isopropyl-6-amino-s-triazine             | -1.000433931 | -1.359755549 |
| 2023 | C17H16N2O3S    | 328.386 | 2-chloro-4-ethylamino-6-amino-s-triazine            | -1.15427319  | -1.063872164 |
| 2024 | C16H14N2O      | 250.295 | Ammelide                                            | -1.151743133 | -1.024946019 |
| 2025 | C21H40N2O3     | 368.554 | Ammeline                                            | 1.136466922  | -1.009332013 |
| 2026 | C19H36N2O2S    | 356.566 | Cyanazine                                           | -1.307853043 | -1.021383495 |
| 2027 | C19H35NO4      | 341.486 | Terbutryn                                           | -1.095480376 | -1.05647066  |
| 2028 | C22H36O3       | 348.519 | Prometon                                            | -1.055118718 | -1.345580605 |
| 2029 | C20H38N2O3     | 354.527 | 2-chloro-4,6-diamino-s-triazine                     | 1.025865042  | -1.002796607 |
| 2030 | C19H35NO4      | 341.486 | Dazomet - Chemservice                               | -1.022992844 | 1.008466594  |
| 2031 | C20H37NO3      | 339.513 | Carbaryl - Chemservice                              | 1.625679683  | 1.20236306   |
| 2032 | C19H28N2O2     | 316.438 | Propoxur - Chemservice                              | 1.077785103  | -1.054115487 |
| 2033 | C14H9Cl2F3N2O  | 349.135 | Aldicarb - Chemservice                              | -1.019859947 | -1.103961576 |
| 2034 | C21H39O6P      | 418.505 | Aldoxycarb                                          | -1.122739985 | 1.03919888   |
| 2035 | C20H26F3N3O4   | 429.433 | Isopropyl-N-[m-chlorophenyl]carbamate - Chemservice | 1.31987479   | -1.039081622 |
| 643  | C20H22Cl2N2O2  | 393.307 | Y3-08                                               | -1.104345529 | -1.017833661 |
| 644  | C16H14Cl2N2O3  | 353.2   | Y3-13                                               | 1.080795457  | -1.115636975 |
| 645  | C18H19Cl2N3O4S | 444.332 | Y3-14                                               | 1.113889128  | -1.149637921 |
| 646  | C18H17Cl2N3O4S | 442.316 | Y3-16                                               | 1.221306841  | 1.062493064  |
| 647  | C14H9Cl3N2O2   | 343.592 | Y3-24                                               | 1.194528237  | -1.064642713 |
| 648  | C14H9Cl2N3O4   | 354.145 | Y3-25                                               | 1.024197911  | 1.16199331   |
| 649  | C14H9Cl3N2O2   | 343.592 | Y3-27                                               | 1.186494764  | 1.2785782    |
| 650  | C14H9Cl2N3O4   | 354.145 | Y3-28                                               | 1.221364275  | -1.093528921 |
| 651  | C18H12Cl2N2O2  | 359.206 | Y3-29                                               | 1.001990606  | -1.032258674 |
| 652  | C14H11ClN2O2   | 274.702 | Y4-01                                               | 1.127216266  | 1.165298415  |

|      |               |         |                                                    |              |              |
|------|---------------|---------|----------------------------------------------------|--------------|--------------|
| 653  | C16H16CIN3O2  | 317.77  | Y4-17                                              | -1.041874021 | 1.001577896  |
| 654  | C14H10CIFN2OS | 308.758 | Y4-37                                              | 1.123321531  | -1.04298333  |
| 655  | C14H11CIN2OS  | 290.768 | Y4-38                                              | 1.037644366  | 1.13616332   |
| 656  | C16H14F2N2O3  | 320.291 | Y5-04                                              | -1.069523211 | 1.29441128   |
| 657  | C17H16IN3O4S  | 485.296 | Y6-11                                              | -1.135196768 | 1.1298875    |
| 658  | C17H16N4O6S   | 404.397 | Y6-12                                              | 1.149338414  | 1.17191666   |
| 659  | C14H18N2O2    | 246.305 | Y7-02                                              | 1.06046109   | 1.392898399  |
| 660  | C20H30N2O2    | 330.464 | Y7-03                                              | -1.093060871 | -1.150580012 |
| 661  | C20H29CIN2O2  | 364.909 | Y7-06                                              | -1.071210541 | 1.006219326  |
| 662  | C15H16N2O     | 240.3   | Y7-04                                              | -1.026081081 | -1.167251846 |
| 663  | C14H17CIN2O2  | 280.75  | Y7-05                                              | 1.127766821  | 1.020620508  |
| 664  | C14H14N2O     | 226.274 | Y7-07                                              | -1.068036056 | -1.016690621 |
| 665  | C14H13CIN2O   | 260.719 | Y7-08                                              | 1.075071166  | 1.22469099   |
| 666  | C15H13CIN2O2  | 288.729 | Y7-09                                              | -1.345216352 | -1.003913002 |
| 667  | C20H15CIN2O3  | 366.798 | Y7-10                                              | -1.436203928 | -1.518924112 |
| 668  | C20H16N2O3    | 332.353 | Y7-11                                              | 1.099673893  | 1.061604077  |
| 669  | C15H14N2O2    | 254.284 | Y7-12                                              | -1.115333119 | -1.0705348   |
| 670  | C18H20N2O2    | 296.364 | Y7-13                                              | 1.492150037  | 1.374011705  |
| 671  | C9H13N        | 135.206 | Aldrich                                            | -1.154133848 | 1.092268864  |
| 2036 | C17H22F3N3O4  | 389.369 | Isopropyl-N-phenylcarbamate - Chemservice          | -1.05570906  | -1.334971094 |
| 2037 | C19H30N2O2    | 318.454 | Oryzalin                                           | -1.014454704 | 1.073983922  |
| 2038 | C21H39O6P     | 418.505 | 2-methylheptyl-4,6-dinitrophenyl Crotonate-chemser | 1.490642964  | -1.117986831 |
| 2039 | C19H37O6P     | 392.467 | DNBP - Chemservice                                 | 1.947956549  | -1.070616938 |
| 2040 | C21H39O5P     | 402.505 | 4,6-Dinitro-o-cresol - Chemservice                 | 1.17025813   | -1.080541474 |
| 2041 | C20H39O5P     | 390.494 | Triclopyr - Chemservice                            | -1.012170288 | -1.2284196   |
| 2042 | C22H41O5P     | 416.532 | Fluroxypyr                                         | -1.001908164 | -1.060432162 |
| 2043 | C22H42NaO6P   | 456.529 | Clopyralid                                         | 1.037368275  | -1.096022908 |
| 2044 | C20H39CINaO6P | 464.937 | Picloram                                           | -1.082370048 | 1.004189354  |
| 2045 | C22H41FNaO6P  | 474.519 | Mecoprop                                           | -1.118237653 | 1.007649411  |
| 2046 | C20H40NaO7P   | 446.491 | Glyphosate                                         | -1.037734124 | -1.034864867 |
| 2047 | C12H26O3S     | 250.398 | Paraquat dichloride                                | -1.018179718 | -1.100255405 |
| 2048 | C20H39BrNaO6P | 509.388 | Diethyl phthalate                                  | 1.013915931  | -1.011071605 |
| 2049 | C20H40NaO7P   | 446.491 | Bromacil                                           | 1.091818823  | 1.098301284  |
| 2050 | C12H7Cl3O2    | 289.542 | Rotenone                                           | 3.691221816  | -1.276305392 |
| 2051 | C24H35N3O3    | 413.553 | Captan - Chemservice                               | 1.110013353  | -1.005220909 |
| 2052 | C30H31N3O3    | 481.585 | Folpet - Chemservice                               | 16.20047243  | 1.717682584  |
| 2053 | C26H31N3O2    | 417.543 | Cacodylic acid, Na salt - Chemservice              | -1.011385981 | 1.169664186  |
| 2055 | C16H14N4O3S   | 342.372 | Chloranocryl - Chemservice                         | 1.189989889  | -1.069239042 |
| 2056 | C17H15N3O3S   | 341.384 | Diphenylacetoneitrile - Chemservice                | 1.067895002  | 1.015771029  |
| 2057 | C16H24N2O     | 260.375 | Maleic acid hydrazide - Chemservice                | 1.080543585  | 1.07862235   |

|      |               |         |                                                        |              |              |
|------|---------------|---------|--------------------------------------------------------|--------------|--------------|
| 2059 | C19H19N5O     | 333.387 | Nicotine - Chemservice                                 | 1.036584187  | -1.147901352 |
| 2060 | C20H30N2O3    | 346.464 | Ziram - Chemservice                                    | 24.38574274  | -1.052273802 |
| 2061 | C18H28N2O3    | 320.427 | Nabam - Chemservice                                    | -1.133650414 | 1.164299113  |
| 2062 | C17H14N2O4S   | 342.369 | Metam sodium -<br>Chemservice                          | -1.152547261 | -1.254425043 |
| 2063 | C21H20N2O4S   | 396.459 | Molinate - Chemservice                                 | -1.293474458 | -1.128142101 |
| 2064 | C19H18N2O4S   | 370.422 | Thiobencarb -<br>Chemservice                           | -1.02945433  | 1.080870161  |
| 2065 | C6H7NO2S      | 157.19  | Eptam - Chemservice                                    | -1.072992245 | 1.310693022  |
| 2066 | C17H16N2O3S   | 328.386 | CDEC - Chemservice                                     | -1.106587144 | 1.094361067  |
| 2067 | C24H27N3O3S   | 437.554 | Ferbam - Chemservice                                   | 1.227851702  | -1.131492982 |
| 2068 | C28H32N4O3S   | 504.644 | Maneb - Chemservice                                    | 1.367449922  | 1.325674084  |
| 2069 | C25H21F3N4O3S | 514.519 | Zineb - Chemservice                                    | 1.134778078  | -1.000116175 |
| 2070 | C27H25F3N4O3S | 542.573 | Tetramethylthiuram<br>disulfide - Chemservice          | 1.194106777  | -1.124086776 |
| 2071 | C27H23N3O4S   | 485.554 | s-propyl<br>butylethylthiocarbamate -<br>Chemservice   | -1.074177761 | -1.109930432 |
| 2072 | C17H14F3N3O2S | 381.372 | Pirimiphos - methyl -<br>Chemservice                   | -1.104946566 | -1.055799312 |
| 2073 | C18H29N3O2    | 319.442 | Pirimiphos - ethyl -<br>Chemservice                    | 1.269532507  | 1.03457947   |
| 2074 | C15H18F3N3O3  | 345.317 | Diazinon - Chemservice                                 | 1.077257955  | 1.019610223  |
| 2075 | C17H20F3N3O5  | 403.353 | Malathion                                              | 1.051036657  | -1.011662733 |
| 2076 | C23H37N3O3    | 403.558 | Chlorpyrifos -<br>Chemservice                          | 1.006156019  | -1.19681576  |
| 2077 | C17H28N2O2    | 292.416 | Chlorpyrifos oxon -<br>Chemservice                     | 1.059682849  | -1.245006349 |
| 2078 | C17H28N2O2    | 292.416 | 2-diethylamino-6-<br>methylpyrimidin-4-ol              | -1.143812873 | -1.222749253 |
| 2079 | C26H36N2O4    | 440.575 | Methamidophos -<br>Chemservice                         | -1.126998184 | 1.122333938  |
| 688  | C10H9N        | 143.185 | Aldrich                                                | 1.228461253  | -1.027782677 |
| 689  | C10H24N2      | 172.311 | Aldrich                                                | -1.078194852 | -1.043571526 |
| 690  | C12H27N       | 185.349 | Aldrich                                                | -1.008520441 | -1.054787792 |
| 692  | C10H9N        | 143.185 | Aldrich                                                | 4.777865603  | 1.113708415  |
| 697  | C8H19N        | 129.243 | Aldrich                                                | -1.035436782 | 1.062324759  |
| 2080 | C24H32N2O4    | 412.522 | Diethyl phosphate -<br>Chemservice                     | -1.181656418 | 1.066895054  |
| 2081 | C24H31N3O2    | 393.522 | 3,5,6-trichloro-2-pyridinol                            | 1.00821137   | -1.111116002 |
| 2082 | C21H21F3N2O5  | 438.397 | Methidathion                                           | 1.029083898  | 1.184144954  |
| 2083 | C21H21F3N2O5  | 438.397 | 6-chloromethyl-4-<br>hydroxy-2-isopropyl<br>pyrimidine | -1.045429841 | -1.015552637 |
| 2084 | C21H22N2O6    | 398.409 | 2-methoxy-3,5,6-<br>trichloropyridine                  | 1.005749973  | -1.108759891 |
| 2085 | C23H32FN3O    | 385.518 | Parathion                                              | -1.100872316 | -1.008549187 |
| 2086 | C17H16N2O3S   | 328.386 | Des-N-isopropyl<br>isophenphos oxygen<br>analog        | -1.240403697 | -1.134217676 |
| 2087 | C16H14N2O     | 250.295 | Des-N-isopropyl<br>isophenphos                         | -1.214731678 | 1.095256854  |
| 2088 | C21H40N2O3    | 368.554 | o,o-diethylthiophosphate                               | 1.056648134  | 1.089148134  |
| 2089 | C19H36N2O2S   | 356.566 | Tributyl (2,4-                                         | 1.768824223  | 1.102758254  |



|      |                 |         |                                                 |              |              |
|------|-----------------|---------|-------------------------------------------------|--------------|--------------|
|      |                 |         | dichlorobenzyl)phosphonium chloride             |              |              |
| 2090 | C19H35NO4       | 341.486 | Tributyl phosphorotrithioite                    | -1.002599335 | -1.039203432 |
| 2091 | C22H36O3        | 348.519 | Phosdrin - Chemservice                          | 1.122018735  | -1.116839669 |
| 2092 | C20H38N2O3      | 354.527 | Carbophenothion - Chemservice                   | 1.51211785   | 1.101302886  |
| 2093 | C19H35NO4       | 341.486 | DDVP - Chemservice                              | -1.142796682 | -1.104179163 |
| 2094 | C20H37NO3       | 339.513 | o,o-dimethyl phosphochloridithioate             | -1.053563141 | 1.063052599  |
| 2095 | C19H28N2O2      | 316.438 | Dichlorprop - Chemservice                       | -1.119228913 | 1.035434302  |
| 2096 | C14H9Cl2F3N2O   | 349.135 | 2,4-D - Chemservice                             | -1.415725063 | 1.002515426  |
| 2097 | C21H39O6P       | 418.505 | 2,4,5-T                                         | 1.280146022  | -1.002821315 |
| 2098 | C20H26F3N3O4    | 429.433 | p,p-DDT                                         | -1.029424654 | -1.172431339 |
| 2099 | C17H22F3N3O4    | 389.369 | o,p'-DDD                                        | 1.578001016  | -1.046182168 |
| 2100 | C19H30N2O2      | 318.454 | p,p-DDD                                         | 3.70330036   | -1.007918778 |
| 2101 | C21H39O6P       | 418.505 | p,p-DDE                                         | -1.305487447 | -1.015308605 |
| 2102 | C19H37O6P       | 392.467 | o,p'-DDE                                        | -1.112383085 | -1.115335358 |
| 2103 | C21H39O5P       | 402.505 | 2,4-DB                                          | 1.000969298  | 1.127962327  |
| 2104 | C20H39O5P       | 390.494 | Dalapon                                         | -1.247594829 | 1.044112855  |
| 2105 | C22H41O5P       | 416.532 | Heptachlor                                      | 1.337017621  | 1.198771722  |
| 2106 | C22H42NaO6P     | 456.529 | Heptachlor epoxide                              | 3.392046302  | 1.133823517  |
| 2107 | C20H39ClNaO6P   | 464.937 | Aldrin                                          | 1.255754244  | 1.079930856  |
| 2108 | C22H41FNaO6P    | 474.519 | Dieldrin                                        | 2.591730576  | 1.031659568  |
| 2109 | C20H40NaO7P     | 446.491 | 2,2'-methylenebis(4-chlorophenol) - Chemservice | 1.11778608   | 1.126579725  |
| 2110 | C12H26O3S       | 250.398 | Pentachlorophenol - Chemservice                 | 6.638174987  | 1.019887347  |
| 2111 | C20H39BrNaO6P   | 509.388 | 2,3,4,6-Tetrachlorophenol - Chemservice         | 3.006485512  | -1.080107134 |
| 2112 | C20H40NaO7P     | 446.491 | 2,4,5-trichlorophenol - Chemservice             | 1.286144148  | -1.261988422 |
| 859  | C14H9BrF2N2O2   | 355.134 | Y1-47                                           | 1.416563023  | 1.33538423   |
| 860  | C15H9F5N2O2     | 344.236 | Y1-45                                           | 1.475318972  | 1.007200879  |
| 861  | C15H9F5N2O2     | 344.236 | Y1-46                                           | 1.038477172  | -1.338751152 |
| 862  | C20H14F2N2O4S   | 416.398 | Y1-24                                           | -1.538463042 | -1.604397156 |
| 863  | C20H13F2N3O6S   | 461.396 | Y1-23                                           | -1.054483514 | -1.230125762 |
| 864  | C18H17F2N3O4S   | 409.407 | Y1-29                                           | -1.218349656 | 1.064079964  |
| 865  | C16H15F2N3O4S   | 383.37  | Y1-26                                           | -1.980727636 | -1.069483474 |
| 866  | C18H19F2N3O4S   | 411.423 | Y1-21                                           | -1.58162161  | -1.247153093 |
| 867  | C22H19F2N3O4S   | 459.466 | Y1-22                                           | 2.853807227  | -1.807287757 |
| 868  | C20H13ClF2N2O5S | 466.842 | Y1-27                                           | -1.016281988 | -1.147981126 |
| 869  | C19H13F2N3O3    | 369.322 | Y1-20                                           | 1.284211317  | 1.114602804  |
| 2113 | C12H7Cl3O2      | 289.542 | 2,4,6-trichlorophenol - Chemservice             | 1.270019729  | 1.336420673  |
| 2114 | C24H35N3O3      | 413.553 | Chloranil - Chemservice                         | 2.418171979  | -1.133689892 |
| 2115 | C30H31N3O3      | 481.585 | Dichlone - Chemservice                          | 7.541895191  | -1.006484304 |
| 2116 | C26H31N3O2      | 417.543 | o-Chlorophenoxyacetic acid - Chemservice        | 1.321767285  | 1.014271156  |

|      |                 |         |                                                    |              |              |
|------|-----------------|---------|----------------------------------------------------|--------------|--------------|
| 2117 | C16H13N3O4S     | 343.357 | p-Chlorophenoxyacetic acid - Chemservice           | 1.503758969  | -1.063610398 |
| 2118 | C16H14N4O3S     | 342.372 | MCPA - Chemservice                                 | 1.252122033  | -1.006968424 |
| 2119 | C17H15N3O3S     | 341.384 | 2,4-Dichlorophenoxyacetic acid, butyl ester        | -1.122039105 | -1.065026348 |
| 2120 | C16H24N2O       | 260.375 | 2,4-Dichlorophenoxyacetic acid, isopropyl ester    | -1.037066182 | -1.031360103 |
| 2121 | C22H38N2O       | 346.55  | 2,4,5-Trichlorophenoxyacetic acid, isopropyl ester | 1.068226539  | 1.20392904   |
| 2122 | C19H19N5O       | 333.387 | Silvex - Chemservice                               | 1.349046552  | 1.011305327  |
| 2129 | C17H16N2O3S     | 328.386 | Tedion - Chemservice                               | 1.474184521  | 1.084716431  |
| 870  | C18H16F2N2O3    | 346.328 | Y1-39                                              | 1.082697462  | 1.075397231  |
| 871  | C14H9F3N2O2     | 294.229 | Y1-30                                              | -1.064202611 | -1.061117819 |
| 872  | C14H9BrF2N2O2   | 355.134 | Y1-32                                              | -1.044948045 | -1.375020203 |
| 873  | C15H9F5N2O2     | 344.236 | Y1-35                                              | -1.09861516  | -1.246782852 |
| 874  | C20H14F2N4O2    | 380.348 | Y1-41                                              | -1.01099243  | -1.187550947 |
| 875  | C16H12F2N2O3    | 318.275 | Y1-37                                              | 1.070578956  | 1.035780359  |
| 876  | C16H12F2N2O4    | 334.274 | Y1-44                                              | 1.044596123  | 1.277858191  |
| 877  | C14H9F2IN2O2    | 402.135 | Y1-33                                              | -1.030580763 | 1.015735932  |
| 878  | C14H9F2N3O4     | 321.236 | Y1-34                                              | -1.1858192   | 1.217099137  |
| 879  | C16H11F2N3O2    | 315.274 | Y1-38                                              | 1.384940992  | 1.20754542   |
| 880  | C15H11ClF2N2O2  | 324.71  | Y2-04                                              | 1.149220163  | -1.024588327 |
| 881  | C16H14F2N2O2    | 304.291 | Y2-18                                              | 1.17509945   | -1.169498396 |
| 882  | C14H8Cl2F2N2O2  | 345.128 | Y2-17                                              | 1.015371408  | 1.139721593  |
| 883  | C15H11ClF2N2O2  | 324.71  | Y2-19                                              | 1.023938773  | -1.01758664  |
| 884  | C14H8Cl2F2N2O2  | 345.128 | Y2-02                                              | 1.015652579  | -1.13278668  |
| 885  | C16H14F2N2O2    | 304.291 | Y2-03                                              | 1.153032722  | -1.213159594 |
| 886  | C15H8F6N2O2     | 362.227 | Y2-16                                              | 1.000811176  | 1.073058141  |
| 887  | C14H8Cl2F2N2O2  | 345.128 | Y2-20                                              | 1.049151539  | 1.053048483  |
| 888  | C16H14F2N2O2    | 304.291 | Y2-27                                              | -1.022194084 | 1.086958828  |
| 889  | C16H14F2N2O2    | 304.291 | Y2-13                                              | -1.042414568 | 1.46330405   |
| 890  | C18H17BrF2N2O2  | 411.241 | Y2-07                                              | 3.35657024   | 1.297763165  |
| 891  | C15H11BrF2N2O3  | 385.16  | Y2-10                                              | 2.408969496  | 1.229355927  |
| 892  | C15H8ClF5N2O2   | 378.681 | Y2-09                                              | 2.443486507  | -1.034910379 |
| 893  | C15H11BrF2N2O2  | 369.161 | Y2-12                                              | 1.45012672   | -1.329237391 |
| 894  | C14H8Cl2F2N2O2  | 345.128 | Y2-06                                              | 1.898475612  | -1.0749967   |
| 895  | C19H20F2N2O2    | 346.371 | Y2-14                                              | 4.409694216  | 1.404846062  |
| 896  | C18H17F2N3O4    | 377.342 | Y2-08                                              | 1.145165668  | -1.074382619 |
| 897  | C15H11BrF2N2O2S | 401.226 | Y2-11                                              | 1.026571221  | -1.051473817 |
| 898  | C16H13BrF2N2O2  | 383.187 | Y2-15                                              | 1.487446214  | 1.413280956  |
| 899  | C14H8ClF3N2O2   | 328.674 | Y2-05                                              | -1.003820021 | 1.916306276  |
| 900  | C15H11BrF2N2O2  | 369.161 | Y2-25                                              | -1.07714809  | 1.05729885   |
| 901  | C15H8ClF5N2O2   | 378.681 | Y2-22                                              | -1.029806302 | -1.097115013 |
| 902  | C15H8BrF5N2O3   | 439.132 | Y2-24                                              | -1.081144907 | 1.025744292  |
| 903  | C16H13BrF2N2O2  | 383.187 | Y2-28                                              | -1.036203323 | -1.001970874 |

|      |                  |         |           |              |              |
|------|------------------|---------|-----------|--------------|--------------|
| 904  | C16H14F2N2O2     | 304.291 | Y2-29     | 1.177480017  | 1.481150575  |
| 905  | C15H11ClF2N2O2   | 324.71  | Y2-26     | -1.056253579 | -1.036011347 |
| 906  | C15H8F6N2O2      | 362.227 | Y2-23     | 1.061839186  | 1.14182561   |
| 907  | C18H17BrF2N2O2   | 411.241 | Y2-21     | 1.012291325  | 1.489189008  |
| 908  | C14H8Cl2F2N2O2   | 345.128 | Y2-30     | 1.094162783  | 1.105300698  |
| 909  | C16H8F8N2O2      | 412.234 | Y2-31     | 1.545475624  | -1.228715784 |
| 910  | C15H10BrClF2N2O2 | 403.606 | Y2-34     | -1.067762372 | 1.122970179  |
| 911  | C14H7BrClF3N2O2  | 407.57  | Y2-33     | 1.014956119  | 1.007821913  |
| 912  | C15H7F7N2O2      | 380.217 | Y2-46     | 1.033027789  | -1.089964138 |
| 913  | C15H7BrF6N2O2    | 441.123 | Y2-45     | -1.011298505 | 1.273419739  |
| 914  | C15H7BrF6N2O3    | 457.122 | Y2-51     | 1.127242278  | 1.016701969  |
| 915  | C15H10BrClF2N2O2 | 403.606 | Y2-35     | 1.160897574  | -1.047771306 |
| 916  | C14H7Cl3F2N2O2   | 379.573 | Y2-32     | 1.036469489  | -1.192553626 |
| 917  | C15H7F7N2O3      | 396.217 | Y2-49     | -1.043973968 | -1.195033724 |
| 918  | C14H7BrF3N3O4    | 418.122 | Y2-50     | 1.115828628  | -1.054414838 |
| 919  | C17H14ClF3N2O3   | 386.753 | Y2-44     | 1.298188806  | -1.053058974 |
| 920  | C21H24F2N2O2     | 374.424 | Y1-09     | -1.030469545 | 1.22854621   |
| 921  | C21H14F2N2O3     | 380.344 | Y1-40     | 1.091477245  | -1.115806766 |
| 922  | C16H7BrF8N2O2    | 491.13  | Y2-40     | 1.441707923  | -1.089982722 |
| 923  | C15H7BrClF5N2O2  | 457.577 | Y2-41     | 1.046453561  | -1.147543273 |
| 924  | C15H7Cl2F5N2O2   | 413.126 | Y2-39     | -1.06395347  | -1.170877831 |
| 925  | C15H7Cl2F5N2O2   | 413.126 | Y2-38     | -1.055513622 | 1.048842256  |
| 926  | C15H7ClF6N2O2    | 396.672 | Y2-48     | 1.03138272   | -1.032467126 |
| 927  | C14H7BrCl2F2N2O2 | 424.024 | Y2-43     | -1.109492335 | 1.018606997  |
| 928  | C15H7ClF6N2O2    | 396.672 | Y2-42     | 1.046810598  | -1.135046389 |
| 929  | C15H7ClF6N2O2    | 396.672 | Y2-36     | -1.10095147  | 1.033398207  |
| 930  | C15H7BrClF5N2O2  | 457.577 | Y2-37     | -1.145589936 | 1.144023379  |
| 931  | C15H7Cl2F5N2O2   | 413.126 | Y2-47     | -1.022739871 | 1.086339379  |
| 932  | C15H7BrF6N2O2    | 441.123 | Y2-56     | 1.180576215  | 1.143571601  |
| 933  | C14H7BrF4N2O2    | 391.115 | Y2-55     | 1.184442455  | -1.043929905 |
| 934  | C14H7Cl3F2N2O2   | 379.573 | Y2-53     | -1.056147099 | 1.68929499   |
| 1174 | C16H24OS         | 264.426 | CRI-19-12 | -1.102007839 | -1.082320055 |
| 935  | C16H13BrF2N2O2   | 383.187 | Y2-54     | 1.032331971  | 1.056282779  |
| 936  | C14H6Cl2F4N2O2   | 381.109 | Y2-60     | -1.094977824 | -1.170552567 |
| 937  | C16H13BrF2N2O2   | 383.187 | Y2-57     | -1.019464604 | 1.024934868  |
| 938  | C17H16F2N2O2     | 318.318 | Y2-52     | -1.018335559 | -1.048726577 |
| 939  | C16H7BrF8N2O2    | 491.13  | Y2-58     | 6.301048533  | 1.012120539  |
| 940  | C15H6Br2F6N2O2   | 520.019 | Y2-59     | 1.499666499  | -1.108744862 |
| 941  | C15H12Cl2N2O2    | 323.174 | Y3-02     | 1.537188007  | -1.068201537 |
| 942  | C22H26Cl2N2O2    | 421.36  | Y3-10     | -1.765080113 | 1.003203775  |
| 943  | C15H12Cl2N2O3    | 339.173 | Y3-12     | 1.170665959  | 1.233090377  |
| 944  | C14H9Cl2FN2O2    | 327.138 | Y3-18     | -1.133200869 | -1.170567622 |
| 945  | C14H9Cl2IN2O2    | 435.044 | Y3-20     | 5.625309192  | 1.061612723  |
| 946  | C16H14Cl2N2O2    | 337.201 | Y3-03     | -1.022884917 | 1.038986278  |
| 947  | C21H24Cl2N2O2    | 407.333 | Y3-09     | 2.6279653    | -1.081193384 |

|      |                |         |            |              |              |
|------|----------------|---------|------------|--------------|--------------|
| 948  | C26H34Cl2N2O2  | 477.466 | Y3-11      | -1.055206176 | 1.017135164  |
| 949  | C14H9Cl3N2O2   | 343.592 | Y3-19      | -1.043006828 | 1.209666583  |
| 950  | C14H10Cl2N2O2  | 309.147 | Y3-01      | 1.007455717  | 1.12940811   |
| 951  | C14H9Cl2N3O4   | 354.145 | Y3-22      | -1.03030354  | -1.017782822 |
| 952  | C20H14Cl2N4O2  | 413.257 | Y3-17      | 1.321211435  | 1.009253761  |
| 953  | C16H15Cl2N3O4S | 416.279 | Y3-15      | -1.722361829 | -1.249389951 |
| 954  | C15H9Cl2F3N2O2 | 377.145 | Y3-21      | 1.092606383  | -1.045694866 |
| 955  | C15H9Cl2N3O2   | 334.157 | Y3-23      | -1.09845261  | 1.040773115  |
| 956  | C20H14Cl2N2O2  | 385.243 | Y3-26      | -1.146853681 | 1.021248834  |
| 957  | C14H8Cl4N2O2   | 378.038 | Y3-34      | -1.04509394  | -1.023976932 |
| 958  | C14H8Cl2F2N2O2 | 345.128 | Y3-31      | -1.07117422  | -1.045419998 |
| 959  | C20H9Cl3F5N3O3 | 540.655 | Y1-52      | 1.669382804  | -1.033549113 |
| 960  | C14H9ClF2N2O2  | 310.683 | Y1-51      | 1.475538488  | 1.98492887   |
| 961  | C16H13ClF2N2O2 | 338.736 | Y1-49      | 1.415052418  | 1.09947088   |
| 962  | C14H8Cl4N2O2   | 378.038 | Y3-33      | 1.202697194  | 1.040807532  |
| 963  | C14H8Cl4N2O2   | 378.038 | Y3-32      | -1.030169868 | 1.082724729  |
| 964  | C13H9Cl2N3O2   | 310.135 | Y3-30      | 1.174569433  | 1.364346425  |
| 965  | C22H14F2N2O2   | 376.356 | Y1-53      | 1.083442783  | -1.143712555 |
| 966  | C15H11ClF2N2O2 | 324.71  | Y1-50      | 1.006577167  | -1.109025576 |
| 967  | C13H8BrF2N3O2  | 356.122 | Y1-54      | -1.093507198 | 1.145369707  |
| 968  | C14H11ClN2OS   | 290.768 | Y4-34      | -1.10169876  | 1.1568736    |
| 969  | C15H13ClN2OS   | 304.795 | Y4-36      | -1.050924853 | -1.214813839 |
| 970  | C14H10Cl2N2OS  | 325.213 | Y4-35      | 1.014961927  | -1.198666604 |
| 972  | C14H10Cl2N2O2  | 309.147 | Y4-08      | 1.153741495  | -1.08128023  |
| 973  | C14H10ClN2O2   | 400.599 | Y4-02      | 1.247327586  | 1.209191157  |
| 974  | C14H10ClN3O4   | 319.7   | Y4-19      | -1.085781417 | -1.131173839 |
| 975  | C15H13ClN2O2S  | 320.794 | Y4-07      | 1.003678324  | 1.029678641  |
| 976  | C15H13ClN2O2   | 288.729 | Y4-06      | -1.00211925  | -1.002612655 |
| 977  | C14H10ClFN2O2  | 292.693 | Y4-15      | 1.016914908  | 1.260889288  |
| 979  | C15H10ClF3N2O2 | 342.7   | Y4-13      | -1.00087969  | -1.190689838 |
| 980  | C15H10ClN3O2   | 299.712 | Y4-14      | 1.152050324  | -1.321183913 |
| 981  | C16H13ClN2O3   | 316.739 | Y4-03      | -1.075442099 | -1.092828404 |
| 982  | C16H15ClN2O2   | 302.755 | Y4-18      | 1.099034625  | 1.355339057  |
| 983  | C17H17ClN2O2   | 316.782 | Y4-11      | -1.020923634 | 1.091415654  |
| 1175 | C24H33BrN2O2   | 461.435 | SHH-01-003 | -1.003372663 | 1.104186126  |
| 984  | C15H13ClN2O3   | 304.728 | Y4-04      | -1.038566591 | -1.055690614 |
| 985  | C14H10ClFN2O2  | 292.693 | Y4-10      | 1.088466761  | 1.105966907  |
| 986  | C14H10ClFN2O2  | 292.693 | Y4-28      | 1.131227177  | -1.065748198 |
| 987  | C14H10BrClN2O2 | 353.598 | Y4-24      | -1.109403462 | -1.062454555 |
| 988  | C15H13ClN2O2   | 288.729 | Y4-25      | -1.053935278 | -1.069756553 |
| 989  | C14H9BrClFN2O2 | 371.589 | Y4-21      | 1.486327518  | -1.002461651 |
| 990  | C20H15ClN2O2   | 350.798 | Y4-12      | 1.320133949  | 1.083242062  |
| 991  | C16H15ClN2O3   | 318.755 | Y4-05      | -1.048083866 | -1.103245482 |
| 992  | C15H10ClN3O2   | 299.712 | Y4-09      | -1.0850148   | -1.015635292 |
| 993  | C14H10Cl2N2O2  | 309.147 | Y4-27      | 1.06341134   | -1.121074232 |

|      |                   |         |       |              |              |
|------|-------------------|---------|-------|--------------|--------------|
| 994  | C14H10CIN3O4      | 319.7   | Y4-26 | 1.063168647  | 1.128356892  |
| 995  | C15H12CI2N2O2     | 323.174 | Y4-22 | 1.595584244  | 1.03621021   |
| 996  | C18H19CIN2O2      | 330.809 | Y4-23 | -1.016986294 | 1.008425123  |
| 997  | C28H23CIN2O4      | 486.946 | Y4-20 | 3.320145562  | -1.192795924 |
| 998  | C13H9CI2N3O2      | 310.135 | Y4-32 | -1.007359111 | -1.014557771 |
| 999  | C12H9CIN2O3       | 264.664 | Y4-33 | 1.221634943  | -1.060268749 |
| 1000 | C12H13CIN2O2      | 252.697 | Y4-30 | 1.200705903  | -1.139332563 |
| 1001 | C11H11CIN2O2      | 238.67  | Y4-29 | -1.070669303 | 1.056652241  |
| 1002 | C12H15CIN2O2      | 254.713 | Y4-31 | -1.080254887 | -1.062116179 |
| 1003 | C14H9CIF2N2O2     | 310.683 | Y5-06 | 1.359752646  | 1.383129448  |
| 1004 | C15H12F2N2O3      | 306.264 | Y5-03 | -1.034523265 | 1.00518594   |
| 1005 | C21H16F2N2O3      | 382.36  | Y5-05 | -1.005685127 | -1.057427514 |
| 1006 | C18H19CIN2O2      | 330.809 | Y5-10 | 1.071618464  | -1.163933136 |
| 1007 | C14H10CIFN2O2     | 292.693 | Y5-11 | 1.247656481  | -1.194140197 |
| 1008 | C16H15CIN2O2      | 302.755 | Y5-12 | -1.094373754 | 1.471725252  |
| 1009 | C15H12F2N2O2      | 290.265 | Y5-01 | 1.559203871  | -1.064745991 |
| 1010 | C20H22F2N2O2      | 360.398 | Y5-02 | 1.180701833  | -1.158569607 |
| 1011 | C14H9CI3N2O2      | 343.592 | Y5-09 | 1.112288181  | 1.054209669  |
| 1012 | C14H10BrCIN2O2    | 353.598 | Y5-07 | 1.160838023  | 1.017413892  |
| 1013 | C16H15CIN2O3      | 318.755 | Y5-08 | -1.003293293 | -1.015271379 |
| 1014 | C21H10CI3F5N2O3   | 539.667 | Y5-14 | 1.046407485  | 1.356013651  |
| 1015 | C21H10CI5F3N2O3   | 572.576 | Y5-17 | 1.011470366  | 1.003038614  |
| 1016 | C25H20CI3F3N2O3   | 559.792 | Y5-16 | 1.016619063  | -1.109774614 |
| 1017 | C21H11BrCI3F3N2O3 | 582.582 | Y5-15 | 1.310637838  | 1.219931798  |
| 1018 | C23H16CI3F3N2O4   | 547.738 | Y5-13 | -1.045353934 | 1.261311321  |
| 1019 | C15H10F3N3O2S     | 353.319 | Y6-01 | 1.073441745  | 1.216702734  |
| 1020 | C15H10BrF2N3O2S   | 414.225 | Y6-03 | 1.133691724  | 1.484633341  |
| 1021 | C15H10CIF2N3O2S   | 369.774 | Y6-02 | 1.063556634  | 1.113865777  |
| 1022 | C15H10F2IN3O2S    | 461.225 | Y6-04 | 1.387032492  | -1.010091729 |
| 1023 | C15H10CI3N3O2S    | 402.683 | Y6-06 | -1.091322788 | -1.091657602 |
| 1024 | C17H15N3O3S       | 341.384 | Y6-13 | 1.058538597  | 1.072874031  |
| 1025 | C17H14CIN3O3S     | 375.829 | Y6-19 | -1.044172237 | 1.083619828  |
| 1026 | C17H14N4O5S       | 386.382 | Y6-21 | 1.003054569  | 1.144647798  |
| 1027 | C18H17N3O3S       | 355.411 | Y6-14 | 1.235096384  | 1.031285915  |
| 1028 | C18H17N3O4S       | 371.41  | Y6-16 | -1.182374962 | -1.344119983 |
| 1029 | C17H14FN3O3S      | 359.375 | Y6-18 | 1.183654233  | -1.07788492  |
| 1030 | C17H14BrN3O3S     | 420.28  | Y6-20 | -1.069323618 | 1.115563952  |
| 1031 | C18H14N4O3S       | 366.394 | Y6-22 | -1.036584928 | -1.275272958 |
| 1032 | C20H21N3O3S       | 383.464 | Y6-15 | 1.314642783  | -1.037661943 |
| 1033 | C19H19N3O4S       | 385.437 | Y6-17 | -1.358523954 | -1.045744236 |
| 1034 | C15H9CIFN3O3S     | 333.768 | Y6-25 | -1.081893023 | -1.203346744 |
| 1035 | C16H12CIN3O3S     | 329.804 | Y6-28 | -1.097219089 | 1.036886897  |
| 1036 | C15H8CIF2N3O3S    | 351.758 | Y6-23 | 1.009086532  | -1.115577488 |
| 1037 | C15H9CIIN3O3S     | 441.674 | Y6-26 | -1.075799668 | 1.264993057  |
| 1038 | C15H9CIN4O3S      | 360.775 | Y6-27 | -1.065629939 | 1.031310991  |

|      |               |         |             |              |              |
|------|---------------|---------|-------------|--------------|--------------|
| 1039 | C15H8Cl3N3O5  | 384.668 | Y6-24       | -1.108035094 | 1.068006465  |
| 1040 | C18H20N2O2    | 296.364 | Y6-31       | -1.09268559  | 1.019005156  |
| 1041 | C22H28N2O3    | 368.469 | Y6-32       | 1.004777002  | 1.037012437  |
| 1042 | C22H28N2O2    | 352.47  | Y6-30       | -1.028678083 | -1.093411493 |
| 1043 | C8H9N3S       | 179.242 | Y6-29       | -1.008368293 | 1.221721122  |
| 1044 | C17H17N3O4S   | 359.4   | Y6-07       | 1.167162623  | 1.104894272  |
| 1045 | C17H16ClN3O4S | 393.845 | Y6-09       | 1.098555683  | -1.010533899 |
| 1046 | C17H16FN3O4S  | 377.39  | Y6-08       | -1.050771472 | 1.039056387  |
| 1047 | C17H16BrN3O4S | 438.296 | Y6-10       | 1.108968934  | 1.03765752   |
| 1048 | C8H9NO2       | 151.163 | Y6-33       | -1.132469884 | 1.10298709   |
| 1049 | C11H15NO3     | 209.242 | Y6-37       | 1.070695518  | -1.010777036 |
| 1050 | C13H19NO2     | 221.295 | Y6-34       | -1.204238611 | 1.137327918  |
| 1051 | C13H19NO2     | 221.295 | Y6-39       | -1.188135103 | -1.098324375 |
| 1052 | C9H10N2O4     | 210.187 | Y6-38       | -1.012444142 | -1.067014834 |
| 1053 | C9H10N2O4     | 210.187 | Y6-36       | -1.028803111 | 1.21169284   |
| 1054 | C9H10N2O4     | 210.187 | Y6-35       | -1.200018077 | -1.199384792 |
| 1191 | C24H36N4O     | 396.569 | LH-19       | 1.027278748  | 1.234531793  |
| 1060 | C13H18O2      | 206.281 |             | 1.186164267  | -1.47602476  |
| 1063 | C14H24N2O2    | 252.353 | LH-1        | -1.153781702 | -1.022883152 |
| 1064 | C16H28N2O2    | 280.406 | LH-2        | 1.02805602   | 1.027054376  |
| 1065 | C12H20N2O4    | 256.298 | LH-3        | 1.074249078  | 1.051757926  |
| 1066 | C10H20N2O2    | 200.278 | LH-5        | -1.023981574 | -1.119702234 |
| 1067 | C14H17N3O4    | 291.302 | LH-6        | -1.053982178 | -1.079156944 |
| 1068 | C15H20N2O2    | 260.332 | LH-8        | -1.169713554 | -1.177622642 |
| 1069 | C12H22N2O2    | 226.315 | LH-7        | -1.004334854 | 1.004004874  |
| 1070 | C18H24N2O4    | 332.394 | LH-9        | 1.093243507  | 1.141573301  |
| 1071 | C15H22N4O4    | 322.36  | LH-10       | -1.28459419  | 1.097946484  |
| 1072 | C14H24N2O4    | 284.351 | LH-11       | -1.064263077 | -1.187240146 |
| 1073 | C14H22N2O6    | 314.334 | LH-12       | 1.007389198  | 1.00145382   |
| 1074 | C15H12N4O6    | 344.279 | LH-13       | -1.315428734 | -1.125680127 |
| 1075 | C17H18N2O4    | 314.336 | LH-14       | -1.469053678 | -1.031211863 |
| 1076 | C15H12Cl2N2O2 | 323.174 | LH-15       | -1.329781393 | -1.047877896 |
| 1077 | C11H22N2O2    | 214.305 | LH-16       | -1.449262538 | 1.169835414  |
| 1078 | C17H22N2O2    | 286.369 | LH-17       | -1.008467172 | 1.259895093  |
| 1079 | C13H22N2O2    | 238.326 | LH-18       | 1.244079714  | -1.106001487 |
| 1081 | C22H41N3O4S   | 443.644 | KIH-271-70  | -1.128466514 | 1.041428483  |
| 1082 | C28H38N2O5    | 482.612 | KIH-271-69B | 1.415324272  | 1.083093715  |
| 1084 | C21H33N3O3    | 375.505 | KIH-271-67C | -1.155137673 | -1.042779624 |
| 1085 | C22H30N2O3    | 370.485 | KIH-271-81  | -1.307451766 | -1.0696429   |
| 1087 | C26H33N3O5    | 467.557 | KIH-271-79C | 1.108320221  | -1.159534619 |
| 1088 | C26H36N2O5    | 456.574 | KIH-271-77  | -1.085480496 | 1.418129163  |
| 1089 | C31H38N2O5    | 518.644 | KIH-271-78  | -1.115701834 | -1.053964916 |
| 1090 | C22H40N2O4    | 396.564 | KIH-271-86  | 1.072120934  | -1.107343994 |
| 1093 | C8H16O2       | 144.211 | ALDRICH     | 1.003309723  | 1.129772543  |
| 1096 | C30H46N2O6    | 530.696 | KIH-284-13  | -1.002316385 | -1.200077307 |

|      |                |         |                  |              |              |
|------|----------------|---------|------------------|--------------|--------------|
| 1099 | C27H42N2O4     | 458.633 | KIH-284-12       | -1.160135032 | -1.134766601 |
| 1100 | C23H39N3O2     | 389.575 | KIH-284-03       | -1.030753073 | 1.172951439  |
| 1102 | C10H17NO3      | 199.247 | FH-010B-1        | -1.138025201 | -1.028841485 |
| 1103 | C11H19NO3      | 213.273 | FH-014A-1        | -1.163466439 | 1.272619617  |
| 1104 | C14H19NO       | 217.307 | FH-015A-1        | -1.071727655 | -1.068978678 |
| 1105 | C15H21NO2      | 247.333 | FH-016A-1        | -1.075628067 | -1.035122826 |
| 1106 | C14H18CINO     | 251.752 | FH-015B-1        | 1.154476996  | 1.109807775  |
| 1107 | C21H29NO       | 311.461 | FH-017A-1        | 1.088821825  | 1.11474978   |
| 1108 | C14H19NO       | 217.307 | FH-019-1         | 1.092387252  | -1.374010129 |
| 1109 | C14H18CINO     | 251.752 | FH-022A-1        | 1.05888721   | -1.101529288 |
| 1110 | C15H21NO2      | 247.333 | FH-022B-1        | -1.19526289  | -1.130821079 |
| 1111 | C16H23NO       | 245.36  | FH-023A-1        | 1.373463158  | 1.184535789  |
| 1113 | C28H44N2O4     | 472.66  | KIH-284-19       | 1.508862484  | 1.087074384  |
| 1114 | C23H42N2O4     | 410.591 | KIH-284-22       | 1.152844604  | -1.041058461 |
| 1116 | C32H48N4O5S    | 600.812 | KIH-284-29       | 1.390413536  | -1.055626266 |
| 1117 | C13H26N2O2     | 242.358 | PDJ-II-38        | -1.00157648  | -1.03772047  |
| 1118 | C13H19CIN2O2   | 270.755 | PDJ-II-44        | 1.048769952  | -1.046500453 |
| 1119 | C21H36N2O2     | 348.523 | PDJ-I-2          | -1.163447527 | -1.072094525 |
| 1120 | C13H17CIN2O    | 252.74  | PDJ-II-47        | 1.348194186  | -1.079213811 |
| 1122 | C20H32N2O2     | 332.48  | KIH-284-32       | -1.050390831 | 1.215580197  |
| 1123 | C22H36N2O2     | 360.533 | KIH-284-33       | 1.178947007  | 1.128186055  |
| 1126 | C31H46N4O4S    | 570.786 | KIH-284-43       | 1.054067695  | 1.042838327  |
| 1127 | C17H24CINO3    | 325.83  | KIH-284-36       | 1.005193797  | -1.188061538 |
| 1128 | C17H24CINO3    | 325.83  | KIH-284-37       | -1.062420215 | -1.170251798 |
| 1129 | C22H39NO       | 333.551 | KIH-284-44       | -1.066047121 | 1.007792785  |
| 1130 | C17H25NO       | 259.387 | FH-025B-1        | -1.043104892 | -1.01217914  |
| 1131 | C21H29NO       | 311.461 | FH-026A-1        | 1.490170394  | 1.101918092  |
| 1132 | C17H25NO       | 259.387 | FH-020B-1        | -1.014414937 | 1.238261791  |
| 1133 | C16H23NO       | 245.36  | FH-025A-1        | 1.138126051  | -1.022094641 |
| 1135 | C14H22N2O2     | 250.337 | PDJ-II-81        | 1.195841738  | -1.201073214 |
| 1136 | C25H42N6O4S    | 522.704 | PDJ-II-62        | -1.018200716 | -1.169256959 |
| 1139 | C20H15CIF3N3O5 | 469.798 | Dupont JT333     | -1.096601601 | -1.016984175 |
| 1140 | C22H17CIF3N3O7 | 527.834 | Dupont MP062     | 1.303834743  | 1.046779672  |
| 1141 | C33H59N3O4     | 561.839 | AUDA-Laa         | 3.222831334  | -1.189305566 |
| 1142 | C39H69N3O9     | 723.98  | AUDA-Laa-GLC     | 1.078163582  | -1.057971144 |
| 1143 | C26H48N2O4     | 452.67  | KIH-284-45       | 1.010146131  | -1.079021827 |
| 1144 | C23H39F3N2O3   | 448.563 | KIH-284-51       | 1.598924417  | 1.116230896  |
| 1148 | C22H38N2O4     | 394.548 | KIH-284-56       | 1.085661094  | -1.205207588 |
| 1149 | C29H37N3O5     | 507.621 | KIH-284-60-trans | 1.501359509  | 1.291657204  |
| 1151 | C26H38N6O5     | 514.617 | CRI-01-12        | 1.208823982  | 1.016832373  |
| 1152 | C26H40N6O5S    | 548.698 | CRI-03-12        | 1.104204763  | -1.023015137 |
| 1155 | C18H31N3O2     | 321.458 | KIH-284-76       | -1.113375072 | -1.133606319 |
| 1156 | C21H35NO3      | 349.507 | KIH-284-77       | -1.112914578 | 1.209162615  |
| 1157 | C22H39NO       | 333.551 | KIH-284-78       | 1.052664408  | 1.277132783  |
| 1159 | C15H23NO2      | 249.349 | CRI-13-12-A      | -1.027892212 | -1.039154207 |

|      |               |          |                |              |              |
|------|---------------|----------|----------------|--------------|--------------|
| 1160 | C15H22N2O     | 246.348  | JRS-Amide-1    | 1.381046256  | -1.080692548 |
| 1162 | C24H35NO2     | 369.54   | KIH-284-71     | 1.736117816  | 1.453103729  |
| 1163 | C15H25N3O2    | 279.378  | KIH-284-74     | 1.071756209  | -1.017694498 |
| 1164 | C23H34N2O4    | 402.527  | KIH-284-79     | -1.012322002 | -1.022580074 |
| 1165 | C23H34N2O4    | 402.527  | KIH-284-80     | 1.069108892  | -1.001043181 |
| 1166 | C26H39NO2     | 397.593  | KIH-284-82     | 1.680751953  | -1.091122142 |
| 1167 | C27H41NO2     | 411.62   | KIH-284-83     | 1.109697094  | 1.018159629  |
| 1169 | C21H32N2O2    | 344.491  | KIH-284-86A    | 1.014501213  | 1.139641436  |
| 1170 | C25H45N3O4S   | 483.707  | KIH-284-87     | 1.083938221  | 1.077609685  |
| 1171 | C24H34N2O2    | 382.539  | SHH-01-001     | 1.179006688  | 1.125735491  |
| 1173 | C23H40N2O3    | 392.575  | Cri-76-7       | 1.064271376  | -1.109041318 |
| 1176 | C17H26N2O     | 274.401  | SHH-01-004     | -1.070748126 | -1.030530872 |
| 1177 | C14H19N3O     | 245.32   | SHH-01-009     | -1.109606043 | -1.077434046 |
| 1178 | C24H32F2N2O2  | 418.52   | SHH-01-013     | -1.054541891 | 2.204369124  |
| 1179 | C24H32Cl2N2O2 | 451.429  | SHH-01-014     | 1.023961093  | -1.076319629 |
| 1180 | C17H28N2O2    | 292.416  | SHH-01-017     | 1.104496646  | -1.032280101 |
| 1181 | C24H33ClN2O2  | 416.984  | SHH-01-018     | 1.11616965   | -1.134405363 |
| 1182 | C19H26N2O     | 298.423  | SHH-01-022     | -1.281659356 | -1.215409017 |
| 1183 | C19H26N2O     | 298.423  | SHH-01-023     | -1.071850594 | 1.13193946   |
| 1185 | C15H22N2O     | 246.348  | SHH-01-024     | -1.021922891 | -1.06262349  |
| 1186 | C15H22N2O     | 246.348  | SHH-01-025     | 1.020573178  | -1.047383389 |
| 1188 | C25H36N2O2    | 396.566  | SHH-01-027     | -1.120954514 | -1.231913944 |
| 1189 | C24H40N2O2    | 388.587  | SHH-01-028     | 1.318993278  | 1.030053237  |
| 1190 | C18H30N2O2    | 306.443  | SHH-01-030     | 1.240213444  | 1.024388048  |
| 1192 | C20H36N4O     | 348.526  | LH-20          | -1.053717279 | 1.017937498  |
| 1193 | C20H34N4O     | 346.51   | LH-21          | 1.008547893  | -1.117553958 |
| 1194 | C20H36N4O2    | 364.525  | LH-22          | -1.204485692 | -1.145369407 |
| 1195 | C41H60N8O13   | 872.961  | PW-01--Tb      | 1.123133845  | -1.127646153 |
| 1196 | C41H60N8O13Tb | 1,031.89 | PW-01--Tb      | -1.082270864 | -1.068020943 |
| 1197 | C17H20N2O     | 268.354  | SHH-01-032     | 1.057721642  | 1.003341715  |
| 1198 | C17H20N2O     | 268.354  | SHH-01-033     | -1.035641315 | -1.275850715 |
| 1199 | C17H20N2O     | 268.354  | SHH-01-036     | 1.093177387  | -1.068230875 |
| 1200 | C17H20N2O     | 268.354  | SHH-01-033+036 | -1.012438483 | 1.025208889  |
| 1201 | C28H43NO4     | 457.645  | KIH-284-92     | -1.107288814 | -1.049009104 |
| 1202 | C24H41N3O3    | 419.601  | KIH 284-94     | -1.135546217 | 1.196925535  |
| 1203 | C28H43NO2     | 425.647  | KIH-284-95     | 1.221069386  | 1.037937725  |
| 1204 | C18H29NO2     | 291.428  | KIH-284-97     | 1.001618325  | -1.059643595 |
| 1205 | C22H33NO2     | 343.503  | KIH-284-98     | -1.018798822 | -1.100971207 |
| 1206 | C20H27NO      | 297.434  | KIH-320-02     | 1.066688098  | -1.184583235 |
| 1207 | C34H42N2O5    | 558.708  | KIH-320-04     | 1.071700506  | -1.172027252 |
| 1208 | C31H56N2O6    | 552.786  | KIH-320-05     | 1.093979896  | -1.0292499   |
| 1209 | C20H33NO3     | 335.481  | KIH-320-06     | -1.175836486 | 1.074724653  |
| 1210 | C17H28N2O2    | 292.416  | KIH-271-55A    | -1.020287389 | 1.168563955  |
| 1211 | C25H37NO2     | 383.567  | KIH-320-03     | 1.971205761  | -1.103630783 |
| 2014 | C17H28N2O2    | 292.416  |                |              |              |



|      |               |         |            |              |              |
|------|---------------|---------|------------|--------------|--------------|
| 1225 | C37H47N5O5    | 641.8   | CRI-37-12B | -1.174558007 | -1.252229237 |
| 1337 | C23H38N2O3    | 390.559 | KIH-271-00 | -1.215570436 | 1.203885904  |
| 1212 | C20H18BrNO3   | 400.266 | SHH-01-035 | 1.295306737  | -1.13694453  |
| 1213 | C21H19NO4     | 349.38  | SHH-01-039 | 1.128770163  | -1.233864128 |
| 1214 | C23H31BrN2O2  | 447.408 | SHH-01-43  | -1.058154138 | -1.097805272 |
| 1215 | C24H32N2O3    | 396.522 | SHH-01-046 | -1.096526869 | -1.148182688 |
| 1216 | C21H18N2O6    | 394.377 | SHH-01-057 | 1.110185901  | -1.054648742 |
| 1217 | C24H31N3O5    | 441.52  | SHH-01-060 | 1.067913156  | -1.096725013 |
| 1218 | C17H28N2O2    | 292.416 | SHH-01-061 | 1.073838669  | -1.308899452 |
| 1219 | C24H34N2O2    | 382.539 | SHH-01-062 | 1.125215395  | -1.059563433 |
| 1220 | C19H27CIN2O2  | 350.883 | PDJ-IV-52B | 1.247878542  | 1.108714092  |
| 1221 | C19H25CIN2O3  | 364.866 | PDJ-IV-53  | 5.926997215  | 1.167062618  |
| 1222 | C19H27CIN2O2  | 350.883 | PDJ-IV-56B | -1.19839121  | -1.176536413 |
| 1223 | C19H27CIN2O   | 334.883 | PDJ-IV-55  | 1.18473511   | -1.01345222  |
| 1224 | C19H29CIN2O   | 336.899 | PDJ-IV-62  | -1.393455103 | -1.210556433 |
| 1226 | C11H18N2O3    | 226.272 | BB-1       | -1.104755125 | -1.244700416 |
| 1227 | C11H18N2O2S   | 242.338 | BB-2       | 1.106595203  | -1.196716279 |
| 1228 | C10H16N2O3    | 212.246 | BB-3       | 1.018358378  | -1.038565087 |
| 1229 | C10H16N2O2S   | 228.311 | BB-4       | -1.077122955 | -1.117624185 |
| 1230 | C9H14N2O2S    | 214.285 | BB-5       | -1.038343641 | 1.065747287  |
| 1231 | C9H14N2O3     | 198.219 | BB-6       | -1.196447103 | 1.00462226   |
| 1232 | C8H12N2OS     | 184.259 | BB-7       | 1.042940103  | -1.07184001  |
| 1233 | C13H14N2OS    | 246.328 | BB-8       | -1.068579866 | 1.36362508   |
| 1234 | C13H14N2OS    | 246.328 | BB-9       | 1.060918966  | -1.003118713 |
| 1235 | C14H16N2O3    | 260.288 | BB-10      | -1.001594032 | -1.275860264 |
| 1236 | C14H16N2O2S   | 276.354 | BB-11      | 1.119234064  | 1.065247366  |
| 1237 | C24H32F2N2O2  | 418.52  | SHH-01-079 | 1.770728899  | 1.206829588  |
| 1238 | C23H38N2O2    | 374.56  | SHH-01-080 | -1.02093381  | -1.165399309 |
| 1239 | C18H30N2O2    | 306.443 | SHH-01-082 | -1.022341591 | 1.198200037  |
| 1240 | C24H32CIN2O2  | 451.429 | SHH-01-090 | -1.040082492 | 1.254290636  |
| 1241 | C25H36N2O2    | 396.566 | SHH-01-091 | -1.016065751 | -1.220486378 |
| 1242 | C27H38F2N2O3  | 476.599 | SHH-01-095 | -1.012001169 | -1.018893528 |
| 1243 | C27H38F2N2O3  | 476.599 | SHH-01-096 | 1.196288201  | 1.25505974   |
| 1244 | C24H33BrN2O2  | 461.435 | SHH-01-098 | 1.187341408  | 1.155880953  |
| 1245 | C24H33CIN2O2  | 416.984 | SHH-01-099 | 1.311265793  | 1.132357509  |
| 1246 | C26H36F2N2O4  | 478.572 | SHH-02-006 | 1.259546479  | -1.052551745 |
| 1247 | C26H36F2N2O4  | 478.572 | SHH-02-007 | 1.481395702  | 1.159547379  |
| 1248 | C24H33BrN2O2  | 461.435 | SHH-02-009 | 1.03910905   | 1.19951826   |
| 1249 | C24H37N3O2    | 399.569 | JRS-06     | -1.08805528  | -1.154784681 |
| 1250 | C16H24N2O     | 260.375 | JRS-07     | 1.047222282  | -1.015178219 |
| 1251 | C16H24N2O     | 260.375 | JRS-08     | -1.13019516  | -1.097062331 |
| 1252 | C14H14CIN3O2S | 323.798 | WY14643    | 1.086140546  | -1.066038971 |
| 1253 | C29H46N2O3S   | 502.752 | GW 7647    | 1.495684427  | 1.003802651  |
| 1254 | C15H22N4O     | 274.361 | PDJ-4-95   | -1.048247694 | 1.01655681   |
| 1255 | C18H28N4O     | 316.441 | PDJ-4-96   | -1.154282466 | -1.046711024 |

|      |              |         |             |              |              |
|------|--------------|---------|-------------|--------------|--------------|
| 1256 | C22H28N4O    | 364.484 | PDJ-4-87    | 1.028930526  | -1.02395155  |
| 1257 | C19H26N2O2   | 314.422 | PDJ-4-79    | 1.116602617  | -1.014788322 |
| 1258 | C27H28N2O3   | 428.523 | PDJ-4-77    | -1.256670908 | -1.083299454 |
| 1259 | C17H30N3O+   | 292.439 | pdj-iv-97   | 1.035622863  | -1.031923884 |
| 1260 | C24H35N3O    | 381.554 | pdj-v-2     | 1.079523674  | -1.146746047 |
| 1261 | C21H35N3O2   | 361.522 | pdj-v-5     | 1.139884503  | -1.09199497  |
| 1262 | C24H33N3O2   | 395.538 | pdj-v-3     | 1.094425982  | -1.012362498 |
| 1263 | C20H35N3O    | 333.511 | pdj-v-11    | -1.073813317 | -1.06755894  |
| 1264 | C24H35N3O    | 381.554 | pdj-v-7     | -1.04053958  | -1.133714031 |
| 1265 | C17H29N3O    | 291.432 | pdj-v-4     | 1.023670355  | 1.03252462   |
| 1266 | C29H45NO2    | 439.673 | KIH 320-11  | 1.095649746  | -1.137723944 |
| 1267 | C17H26N2O2   | 290.401 | KIH 320-12  | 1.124102471  | -1.122571446 |
| 1268 | C18H27NO2    | 289.412 | KIH 320-13  | 1.153727381  | -1.01957537  |
| 1269 | C22H40N2O4   | 396.564 | KIH 320-29  | -1.012645653 | 1.121720949  |
| 1270 | C24H35N3O3   | 413.553 | KIH 320-32  | 1.023479488  | -1.113499078 |
| 1271 | C23H42N2O4   | 410.591 | KIH 320-31  | -1.137546854 | 1.054113722  |
| 1272 | C23H41N3O4S  | 455.654 | KIH 320-20  | 1.136764828  | -1.092874193 |
| 1273 | C23H39N3O3   | 405.574 | KIH 320-36  | -1.16549873  | 1.004607046  |
| 1274 | C23H40N4O3   | 420.589 | KIH 320-35  | 1.007683848  | -1.199125743 |
| 1275 | C20H24N4O    | 336.431 | KIH 320-37  | 1.095614304  | -1.174572438 |
| 1276 | C23H31FN2O2  | 386.503 | SHH02-033   | 1.076143047  | -1.27166656  |
| 1277 | C23H31FN2O2  | 386.503 | SHH02-034   | 1.15208832   | -1.04423839  |
| 1278 | C23H32N3O4   | 414.518 | SHH02-035   | -1.028791188 | -1.142940461 |
| 1279 | C24H34N2O3   | 398.538 | SHH02-036   | 1.193977907  | 1.101653815  |
| 1280 | C13H24N2O3   | 256.341 | SHH02-037   | 1.059211882  | 1.114616952  |
| 1281 | C23H32N3O4   | 414.518 | SHH02-043   | 1.2486294    | -1.01332511  |
| 1282 | C23H30F2N2O2 | 404.493 | SHH02-044   | 1.040557639  | -1.220369997 |
| 1283 | C17H27NO2    | 277.402 | SHH02-048   | 1.029443695  | -1.009553064 |
| 1284 | C25H33F3N2O2 | 450.537 | SHH02-054   | -1.058596063 | -1.04444089  |
| 1285 | C25H33F3N2O3 | 466.536 | SHH02-055   | -1.148250116 | -1.189318712 |
| 1286 | C24H34N2O3   | 398.538 | SHH02-063   | -1.002189327 | -1.02522268  |
| 1287 | C23H30F2N2O2 | 404.493 | SHH02-064   | -1.312613009 | -1.050271055 |
| 1288 | C20H22F2N2O2 | 360.398 | SHH02-065   | -1.031543602 | -1.009615071 |
| 1289 | C20H22F2N2O2 | 360.398 | SHH02-065_2 | 1.056978548  | -1.163323475 |
| 1290 | C25H33F2NO2  | 417.532 | SHH02-066   | 2.292773956  | 1.042163427  |
| 1291 | C24H33FN2O2  | 400.529 | SHH02-067   | 1.05074395   | 1.076710236  |
| 1292 | C16H27N3O    | 277.405 | pdj-v-24    | -1.092663052 | -1.149629    |
| 1293 | C18H31N3O    | 305.458 | pdj-v-43    | -1.064117952 | 1.069944379  |
| 1294 | C18H29N3O2   | 319.442 | pdj-v-44    | -1.136170474 | -1.141168205 |
| 1295 | C19H33N3O    | 319.485 | pdj-v-42    | -1.102202173 | 1.014890849  |
| 1296 | C19H33N3O    | 319.485 | pdj-v-46    | -1.005855478 | -1.05675454  |
| 1297 | C19H31N3O2   | 333.468 | pdj-v-40    | 1.075085425  | 1.093586737  |
| 1298 | C20H33N3O2   | 347.495 | pdj-v-45    | 1.011772825  | 1.474821004  |
| 1299 | C23H33N3O    | 367.528 | pdj-v-27    | 1.150844286  | -1.026087007 |
| 1300 | C23H31N3O2   | 381.511 | pdj-v-26    | -1.057618042 | -1.233576394 |

|      |              |         |              |              |              |
|------|--------------|---------|--------------|--------------|--------------|
| 1301 | C20H35N3O    | 333.511 | pdj-v-52     | -1.003844242 | 1.208531274  |
| 1302 | C21H37N3O    | 347.538 | pdj-v-53     | -1.021916245 | -1.170912989 |
| 1303 | C20H33N3O2   | 347.495 | pdj-v-54     | 1.031037234  | 1.074798821  |
| 1304 | C19H31N3O2   | 333.468 | pdj-v-52     | -1.029013062 | 1.088876869  |
| 1305 | C28H34N2O3   | 446.581 | KIH-320-44   | -1.068512547 | 1.257630011  |
| 1306 | C24H34N4O3   | 426.552 | KIH-320-57   | 1.265437734  | 1.160210389  |
| 1307 | C25H36N4O3   | 440.578 | KIH-320-58   | 1.126212718  | 1.12625124   |
| 1308 | C21H29N3O2   | 355.474 | KIH-320-40   | 1.006490802  | -1.026043405 |
| 1309 | C27H44N4O3   | 472.663 | KIH-320-42   | 1.123320762  | -1.082676613 |
| 1310 | C20H33N3O2   | 347.495 | KIH-320-46   | -1.068278105 | -1.080382974 |
| 1311 | C15H24N2O2   | 264.363 | KIH-320-55   | -1.205531543 | 1.157867148  |
| 1312 | C23H41N4O4   | 395.576 | KIH-320-26   | -1.126614967 | -1.122864531 |
| 1313 | C22H40N2O4   | 396.564 | KIH-320-50   | 1.210319146  | 1.019799042  |
| 1314 | C18H28N2O3   | 320.427 | PAW-01-76    | 1.013398977  | 1.040318426  |
| 1315 | C20H33N3O3   | 363.494 | PAW-01-78    | 1.119034612  | 1.076340406  |
| 1316 | C16H28CIN3O  | 313.866 | pdj-v-68b    | -1.018551992 | 1.003900161  |
| 1317 | C18H22N2O3   | 314.379 | PAW-02-11-1M | 1.261096547  | 1.179308815  |
| 1318 | C18H22N2O3   | 314.379 | PAW-02-11-1P | 1.379763059  | -1.221518771 |
| 1319 | C19H24N2O3   | 328.405 | PAW-02-11-2P | -1.160304098 | 1.048730245  |
| 1320 | C22H29N3O3   | 383.484 | KIH 320-45   | 1.125792547  | -1.018146544 |
| 1321 | C27H38N4O3   | 466.616 | KIH 320-49   | 1.018266248  | -1.212623672 |
| 1322 | C18H22N2O3   | 314.379 | KIH 320-43   | -1.03800874  | 1.396901248  |
| 1323 | C31H32N2O3   | 480.597 | KIH 320-48   | 1.041855366  | 1.014949464  |
| 1324 | C17H22N2O2   | 286.369 | KIH 284-80A  | 1.039547737  | 1.132659411  |
| 1325 | C21H28N2O4   | 372.458 | KIH 320-51   | 1.313183392  | -1.156006723 |
| 1326 | C19H24N2O4   | 344.405 | KIH 320-51B  | 1.014745786  | 1.185121269  |
| 1327 | C22H30N2O4   | 386.485 | KIH 320-52   | 1.248558065  | 1.296423229  |
| 1328 | C20H26N2O4   | 358.431 | KIH 320-52B  | 1.013095635  | -1.091245471 |
| 1329 | C7H10N2      | 122.168 | KIH 320-59B  | -1.151994127 | 1.214966029  |
| 1330 | C17H21CIN2O2 | 320.814 | TK 1         | 1.891424053  | -1.233863769 |
| 1331 | C18H24N2O2   | 300.395 | TK 2         | 1.208721275  | 1.212178969  |
| 1332 | C18H24N2O3   | 316.395 | TK 3         | 1.126929485  | 1.043574727  |
| 1333 | C19H24N2O2   | 312.406 | TK 4         | -1.312311112 | 1.132145966  |
| 1334 | C19H24N2O3   | 328.405 | TK 5         | 1.269838331  | 1.176545729  |
| 1335 | C20H26N2O3   | 342.432 | TK 6         | -1.067330039 | 1.152164574  |
| 1336 | C23H26N2O2   | 362.465 | TK 7         | 1.79686602   | 1.017665323  |
| 1338 | C22H39N3O3   | 393.563 | KIH 320-66   | -1.025066437 | 1.066482274  |
| 1339 | C23H33N3O3   | 399.526 | KIH 320-63   | -1.070635939 | -1.123381318 |
| 1340 | C24H34N4O2   | 410.552 | KIH 320-67   | 1.154454357  | -1.004603372 |
| 1341 | C25H36N4O3   | 440.578 | KIH 320-68   | 1.294835849  | 1.146664561  |
| 1342 | C23H32N4O2   | 396.526 | KIH 320-59   | -1.00574287  | -1.184276886 |
| 1343 | C22H30N4O2   | 382.499 | pdj-v-73b    | -1.193348711 | 1.186261895  |
| 1344 | C25H33N3O4   | 439.547 | pdj-v-77b    | 1.099977817  | 1.018479507  |
| 1345 | C25H33N3O4   | 439.547 | pdj-v-82b    | -1.096148969 | -1.091168273 |
| 1346 | C25H33N3O4   | 439.547 | pdj-v-76     | -1.076499364 | -1.177105119 |

|      |               |         |              |              |              |
|------|---------------|---------|--------------|--------------|--------------|
| 1347 | C21H33N3O4    | 391.504 | pdj-v-80b    | -1.18828334  | -1.159794648 |
| 1348 | C22H35N3O4    | 405.531 | pdj-v-79b    | 1.061530496  | 1.059495117  |
| 1349 | C23H32N4O2    | 396.526 | pdj-v-73     | 1.006305829  | -1.087734274 |
| 1350 | C22H35N3O4    | 405.531 | pdj-v-80a    | 1.054849044  | 1.049017287  |
| 1351 | C26H35N3O4    | 453.574 | pdj-v-82a    | 1.070132371  | 1.009387876  |
| 1352 | C26H35N3O4    | 453.574 | pdj-v-77a    | 1.043141918  | 2.22070442   |
| 1353 | C26H35N3O4    | 453.574 | pdj-v-74     | -1.081070663 | 1.015864346  |
| 1354 | C23H37N3O4    | 419.558 | pdj-v-79a    | 1.083719248  | 1.081134891  |
| 1355 | C17H28N2O3    | 308.416 | CRI-07-12C   | 1.484766946  | -1.025019278 |
| 1356 | C19H32N2O3    | 336.469 | CRI-70-12A   | -2.696325713 | -1.655563147 |
| 1357 | C23H43N3O     | 377.607 | CRI-70-12C   | -1.069756394 | 1.138644415  |
| 1359 | C19H24N2O2    | 312.406 | TK8          | 2.314929472  | 1.334720755  |
| 1360 | C24H26N2O2    | 374.475 | TK9          | 4.223293392  | 1.034990031  |
| 1376 | C21H36N2O3    | 364.522 | KIH-271-74   | 1.633148242  | 1.011382792  |
| 1361 | C24H26N2O2    | 374.475 | TK10         | 4.982256987  | 1.004325315  |
| 1362 | C19H24N2O3    | 328.405 | TK11         | 1.028302442  | 1.053736011  |
| 1363 | C20H26N2O3    | 342.432 | TK12         | -1.004283495 | 1.067430642  |
| 1364 | C24H26N2O3    | 390.475 | TK13         | 1.495689133  | 1.012998487  |
| 1365 | C20H26N2O3    | 342.432 | PAW-02-11-3P | -1.445190497 | -1.358095246 |
| 1366 | C21H28N2O3    | 356.459 | PAW-02-11-4P | -2.809935167 | -3.255034425 |
| 1367 | C19H24N2O3    | 328.405 | PAW-02-11-2M | -1.020274347 | -1.007223805 |
| 1368 | C20H26N2O3    | 342.432 | PAW-02-11-3M | 1.029697642  | -1.100904262 |
| 1369 | C22H27NO2     | 337.455 | HHZ-001      | 2.137610951  | -1.017569394 |
| 1370 | C20H23NO2     | 309.402 | HHZ-002      | 3.525679557  | 1.2019929    |
| 1371 | C19H21NO2     | 295.376 | HHZ-003      | 1.557784919  | -1.172462829 |
| 1372 | C21H25NO2     | 323.429 | HHZ-004      | 5.67212374   | 1.125217497  |
| 1373 | C23H29NO2     | 351.482 | HHZ-005      | 3.360353135  | 1.216404436  |
| 1374 | C21H25NO2     | 323.429 | HHZ-006      | 2.805681986  | 1.175910833  |
| 1377 | C17H25FN2O2   | 308.391 | SHH-CC-1-1   | -1.25411461  | 1.100660058  |
| 1378 | C19H20F2N2O2  | 346.371 | SHH-CC-1-2   | 1.199436308  | -1.266490166 |
| 1379 | C19H20F2N2O2  | 346.371 | SHH-CC-1-3   | 5.779660333  | -1.079110574 |
| 1380 | C20H20F4N2O2  | 396.379 | SHH-CC-4-1   | 1.431933504  | -1.038881016 |
| 1381 | C20H20F4N2O2  | 396.379 | SHH-CC-1-5   | 7.234719909  | 1.139558246  |
| 1382 | C23H23FN2O2   | 378.439 | SHH-CC-1-6   | 1.680082299  | 1.021464834  |
| 1383 | C19H21FN2O2   | 328.381 | SHH-CC-1-7   | -1.217191952 | 1.013978174  |
| 1384 | C20H23FN2O2   | 342.407 | SHH-CC-1-8   | -1.225569473 | -1.126167479 |
| 1385 | C20H20F4N2O2  | 396.379 | SHH-CC-1-9   | 6.210013864  | 1.026164292  |
| 1386 | C20H23FN2O2   | 342.407 | SHH-CC-1-10  | 1.25268724   | 1.107463983  |
| 1387 | C20H23FN2O2   | 342.407 | SHH-CC-1-11  | 1.074820848  | -1.023937121 |
| 1388 | C19H20CIFN2O2 | 362.826 | SHH-CC-1-12  | -1.035049546 | -1.16560352  |
| 1389 | C21H25FN2O2   | 356.434 | SHH-CC-1-13  | 1.039929322  | -1.066446975 |
| 1390 | C20H23FN2O3   | 358.407 | SHH-CC-1-14  | 1.083607463  | -1.215127299 |
| 1391 | C19H20FN3O4   | 373.378 | SHH-CC-1-15  | 1.545217553  | -1.183535648 |
| 1392 | C19H20FN3O4   | 373.378 | SHH-CC-1-16  | 5.341912627  | 1.051383621  |
| 1393 | C19H20FN3O4   | 373.378 | SHH-CC-1-17  | 3.832064612  | -1.025723275 |

|      |                |         |             |              |              |
|------|----------------|---------|-------------|--------------|--------------|
| 1394 | C19H19F3N2O2   | 364.362 | SHH-CC-1-18 | 1.046554919  | -1.066334604 |
| 1395 | C19H20BrFN2O2  | 407.277 | SHH-CC-1-19 | 1.083249304  | -1.171633082 |
| 1396 | C20H23FN2O3    | 358.407 | SHH-CC-1-20 | 1.141083097  | -1.211902332 |
| 1397 | C20H23FN2O3    | 358.407 | SHH-CC-1-21 | 1.366069344  | 1.124961788  |
| 1398 | C19H20CIFN2O2  | 362.826 | SHH-CC-1-22 | 6.115272273  | 1.194086304  |
| 1399 | C20H20F4N2O3   | 412.378 | SHH-CC-1-23 | 1.305437945  | 1.099814766  |
| 1400 | C20H20F4N2O3   | 412.378 | SHH-CC-1-24 | 8.397600204  | 1.400264553  |
| 1401 | C19H20BrFN2O2  | 407.277 | SHH-CC-1-25 | 1.740197603  | 1.149722687  |
| 1402 | C19H19Cl2FN2O2 | 397.271 | SHH-CC-1-26 | 1.083876398  | 1.041811889  |
| 1403 | C19H20CIFN2O2  | 362.826 | SHH-CC-1-27 | 2.622255033  | 1.002901999  |
| 1404 | C19H20BrFN2O2  | 407.277 | SHH-CC-1-28 | 5.289507476  | -1.060664981 |
| 1405 | C23H31FN2O2    | 386.503 | SHH-CC-1-29 | 1.576983489  | 1.142565609  |
| 1406 | C25H33FN2O2    | 412.54  | SHH-CC-1-30 | 1.01973248   | 1.027631732  |
| 1407 | C21H25FN2O2    | 356.434 | SHH-CC-1-31 | 1.186953891  | -1.047167429 |
| 1408 | C23H23FN2O2    | 378.439 | SHH-CC-1-32 | 1.014241018  | 1.04001178   |
| 1409 | C19H20FIN2O2   | 454.277 | SHH-CC-1-33 | 2.224984696  | 1.121280884  |
| 1410 | C20H23FN2O2S   | 374.472 | SHH-CC-1-34 | 1.557342137  | -1.019163869 |
| 1411 | C26H25FN2O2    | 416.487 | SHH-CC-1-35 | -1.070927538 | 1.148181665  |
| 1412 | C26H27FN2O2    | 418.503 | SHH-CC-1-36 | 1.284275233  | 1.267578623  |
| 1413 | C18H25FN2O2    | 320.402 | SHH-CC-1-37 | 1.05622662   | 1.04343067   |
| 1414 | C22H27FN2O2    | 370.46  | SHH-CC-1-38 | 2.170420917  | 1.062028796  |
| 1415 | C20H29FN2O2    | 348.455 | SHH-CC-1-39 | 2.366900928  | -1.051350547 |
| 1416 | C21H31FN2O2    | 362.481 | SHH-CC-1-40 | 1.946950382  | 1.116452615  |
| 1417 | C25H39FN2O2    | 418.588 | SHH-CC-1-41 | -1.065175223 | -1.10343787  |
| 1418 | C19H20FIN2O2   | 454.277 | SHH-CC-1-42 | 7.35858886   | 1.119135423  |
| 1419 | C19H20FIN2O2   | 454.277 | SHH-CC-1-43 | 1.566774423  | 1.053428857  |
| 1420 | C20H23FN2O2S   | 374.472 | SHH-CC-1-44 | 1.241750911  | 1.177930986  |
| 1421 | C19H27FN2O2    | 334.428 | SHH-CC-1-45 | 1.326452043  | 1.257002091  |
| 1422 | C19H20F2N2O2   | 346.371 | SHH-CC-1-46 | 1.071975987  | -1.085319678 |
| 1423 | C20H23FN2O2S   | 374.472 | SHH-CC-1-47 | 3.730999461  | -1.031523519 |
| 1424 | C20H23FN2O2    | 342.407 | SHH-CC-1-48 | 1.103212786  | 1.058170639  |
| 1426 | C20H21F3N2O2   | 378.388 | SHH-CC-2-2  | -1.112399166 | 1.242667576  |
| 1427 | C20H21F3N2O2   | 378.388 | SHH-CC-2-3  | 1.066667186  | 1.008014965  |
| 1428 | C21H21F5N2O2   | 428.396 | SHH-CC-2-4  | -1.133497722 | -1.143685602 |
| 1429 | C21H21F5N2O2   | 428.396 | SHH-CC-2-5  | 2.596539678  | -1.053861812 |
| 1430 | C24H24F2N2O2   | 410.456 | SHH-CC-2-6  | 1.276554688  | 1.08701645   |
| 1431 | C20H22F2N2O2   | 360.398 | SHH-CC-2-7  | 1.060379842  | -1.127165297 |
| 1432 | C21H24F2N2O2   | 374.424 | SHH-CC-2-8  | 1.059960178  | 1.152889488  |
| 1433 | C21H21F5N2O2   | 428.396 | SHH-CC-2-9  | 1.067986559  | -1.06825476  |
| 1434 | C21H24F2N2O2   | 374.424 | SHH-CC-2-10 | 1.191652714  | 1.411324802  |
| 1435 | C21H24F2N2O2   | 374.424 | SHH-CC-2-11 | 1.114150701  | 1.196266333  |
| 1436 | C20H21CIF2N2O2 | 394.843 | SHH-CC-2-12 | -1.016480141 | -1.226011006 |
| 1437 | C22H26F2N2O2   | 388.451 | SHH-CC-2-13 | -1.020161515 | -1.074582968 |
| 1438 | C21H24F2N2O3   | 390.424 | SHH-CC-2-14 | 1.124007759  | 1.012018252  |
| 1439 | C20H21F2N3O4   | 405.395 | SHH-CC-2-15 | -1.060673269 | 1.109837796  |

|      |                 |         |             |              |              |
|------|-----------------|---------|-------------|--------------|--------------|
| 1440 | C20H21F2N3O4    | 405.395 | SHH-CC-2-16 | 1.121695294  | 1.356324634  |
| 1441 | C20H21F2N3O4    | 405.395 | SHH-CC-2-17 | 1.010556767  | -1.122200661 |
| 1442 | C20H20F4N2O2    | 396.379 | SHH-CC-2-18 | 1.067048878  | -1.109691238 |
| 1443 | C20H21BrF2N2O2  | 439.294 | SHH-CC-2-19 | 1.156637712  | -1.0059609   |
| 1444 | C21H24F2N2O3    | 390.424 | SHH-CC-2-20 | 1.088163324  | -1.043585889 |
| 1445 | C21H24F2N2O3    | 390.424 | SHH-CC-2-21 | 5.307618248  | -1.054244921 |
| 1446 | C20H21ClF2N2O2  | 394.843 | SHH-CC-2-22 | 1.563230782  | -1.074299051 |
| 1447 | C21H21F5N2O3    | 444.395 | SHH-CC-2-23 | 1.029481651  | 1.148380076  |
| 1448 | C21H21F5N2O3    | 444.395 | SHH-CC-2-24 | 1.227781741  | -1.013717259 |
| 1449 | C20H21BrF2N2O2  | 439.294 | SHH-CC-2-25 | 1.042892791  | 1.101400657  |
| 1450 | C20H20Cl2F2N2O2 | 429.288 | SHH-CC-2-26 | -1.0809353   | 1.250488668  |
| 1451 | C20H21ClF2N2O2  | 394.843 | SHH-CC-2-27 | 1.021163861  | -1.207467371 |
| 1452 | C20H21BrF2N2O2  | 439.294 | SHH-CC-2-28 | 1.610574847  | -1.212634414 |
| 1454 | C26H34F2N2O2    | 444.557 | SHH-CC-2-30 | -1.141661754 | -1.108653273 |
| 1455 | C22H26F2N2O2    | 388.451 | SHH-CC-2-31 | 1.067411206  | 1.005041573  |
| 1456 | C24H24F2N2O2    | 410.456 | SHH-CC-2-32 | 2.665671281  | -1.01646597  |
| 1457 | C20H21F2IN2O2   | 486.294 | SHH-CC-2-33 | 1.000747668  | 1.024328145  |
| 1458 | C21H24F2N2O2S   | 406.489 | SHH-CC-2-34 | 1.091548287  | 1.207571238  |
| 1459 | C27H26F2N2O2    | 448.504 | SHH-CC-2-35 | 1.088107133  | 1.716534127  |
| 1460 | C27H28F2N2O2    | 450.52  | SHH-CC-2-36 | -1.267678346 | -1.022093791 |
| 1462 | C23H28F2N2O2    | 402.477 | SHH-CC-2-38 | -1.051145522 | -1.060688447 |
| 1466 | C20H21F2IN2O2   | 486.294 | SHH-CC-2-42 | 1.332030255  | 1.034791751  |
| 1467 | C20H21F2IN2O2   | 486.294 | SHH-CC-2-43 | -1.053675396 | -1.146874027 |
| 1468 | C21H24F2N2O2S   | 406.489 | SHH-CC-2-44 | -1.025402724 | -1.068688513 |
| 1469 | C20H28F2N2O2    | 366.445 | SHH-CC-2-45 | 1.139512884  | -1.086852918 |
| 1471 | C21H24F2N2O2S   | 406.489 | SHH-CC-2-47 | -1.086789265 | -1.139279263 |
| 1472 | C21H24F2N2O2    | 374.424 | SHH-CC-2-48 | 1.067505027  | 1.43458649   |
| 1474 | C21H23FN4O3S    | 430.496 | SHH-CC-3-2  | -1.445710033 | -1.194691455 |
| 1475 | C21H23FN4O3S    | 430.496 | SHH-CC-3-3  | -1.250373784 | -1.243797009 |
| 1476 | C22H23F3N4O3S   | 480.503 | SHH-CC-3-4  | -1.107381334 | -1.032169574 |
| 1477 | C22H23F3N4O3S   | 480.503 | SHH-CC-3-5  | -1.506994728 | 1.008903903  |
| 1478 | C25H26N4O3S     | 462.564 | SHH-CC-3-6  | -1.174004616 | 1.023983353  |
| 1479 | C21H24N4O3S     | 412.505 | SHH-CC-3-7  | -1.993178427 | -1.015448565 |
| 1480 | C22H26N4O3S     | 426.532 | SHH-CC-3-8  | -1.292392704 | -1.114879853 |
| 1481 | C22H23F3N4O3S   | 480.503 | SHH-CC-3-9  | -1.034726997 | 1.045671346  |
| 1482 | C22H26N4O3S     | 426.532 | SHH-CC-3-10 | -1.320798115 | 1.029130354  |
| 1483 | C22H26N4O3S     | 426.532 | SHH-CC-3-11 | 1.009598125  | -1.132022376 |
| 1484 | C21H23ClN4O3S   | 446.95  | SHH-CC-3-12 | 1.184417306  | -1.072723238 |
| 1485 | C23H28N4O3S     | 440.558 | SHH-CC-3-13 | 1.022364557  | 1.040198162  |
| 1486 | C22H26N4O4S     | 442.531 | SHH-CC-3-14 | -1.463367294 | -1.097238005 |
| 1487 | C21H23N5O5S     | 457.503 | SHH-CC-3-15 | -1.700395852 | -1.06090815  |
| 1489 | C21H23N5O5S     | 457.503 | SHH-CC-3-17 | -1.594969996 | 1.079458676  |
| 1490 | C21H22F2N4O3S   | 448.486 | SHH-CC-3-18 | -1.128323947 | 1.056593164  |
| 1491 | C21H23BrN4O3S   | 491.401 | SHH-CC-3-19 | -1.419083522 | -1.163117126 |
| 1492 | C22H26N4O4S     | 442.531 | SHH-CC-3-20 | -1.415039914 | 1.076568728  |

|      |                |         |                                       |              |              |
|------|----------------|---------|---------------------------------------|--------------|--------------|
| 1494 | C21H23CIN4O3S  | 446.95  | SHH-CC-3-22                           | -1.751340613 | 1.190846315  |
| 1495 | C22H23F3N4O4S  | 496.503 | SHH-CC-3-23                           | -1.369783583 | 1.090918094  |
| 1496 | C22H23F3N4O4S  | 496.503 | SHH-CC-3-24                           | 1.038378023  | -1.014862779 |
| 1497 | C21H23BrN4O3S  | 491.401 | SHH-CC-                               | -1.344382599 | -1.017779881 |
| 1498 | C21H22Cl2N4O3S | 481.395 | SHH-CC-3-26                           | -1.336004355 | -1.024508789 |
| 1499 | C21H23CIN4O3S  | 446.95  | SHH-CC-3-27                           | -1.543007804 | 1.346911365  |
| 1500 | C21H23BrN4O3S  | 491.401 | SHH-CC-3-28                           | -1.748260677 | 1.009126042  |
| 1501 | C25H34N4O3S    | 470.627 | SHH-CC-3-29                           | -1.462062205 | 1.034599279  |
| 1502 | C27H36N4O3S    | 496.665 | SHH-CC-3-30                           | 2.329171392  | 1.148117721  |
| 1503 | C23H28N4O3S    | 440.558 | SHH-CC-3-31                           | -1.093157485 | 1.157586371  |
| 1504 | C25H26N4O3S    | 462.564 | SHH-CC-3-32                           | -1.461903545 | -1.124485293 |
| 1505 | C21H23IN4O3S   | 538.402 | SHH-CC-3-33                           | -1.572134293 | -1.139463664 |
| 1506 | C22H26N4O3S2   | 458.597 | SHH-CC-3-34                           | -1.457058104 | -1.165361148 |
| 1507 | C28H28N4O3S    | 500.612 | SHH-CC-3-35                           | -1.028590584 | 2.452243517  |
| 1508 | C28H30N4O3S    | 502.628 | SHH-CC-3-36                           | 1.778934563  | 1.103507025  |
| 1509 | C20H28N4O3S    | 404.526 | SHH-CC-3-37                           | -1.330195279 | 1.055871618  |
| 1510 | C24H30N4O3S    | 454.585 | SHH-CC-3-38                           | -1.251025026 | -1.028075592 |
| 1511 | C22H32N4O3S    | 432.579 | SHH-CC-3-39                           | -1.115733149 | 1.283140256  |
| 1512 | C23H34N4O3S    | 446.606 | SHH-CC-3-40                           | -1.147423596 | 1.196061358  |
| 1513 | C27H42N4O3S    | 502.712 | SHH-CC-3-41                           | 1.44387328   | -1.005777889 |
| 1514 | C21H23IN4O3S   | 538.402 | SHH-CC-3-42                           | -1.972507808 | 1.015754067  |
| 1515 | C21H23IN4O3S   | 538.402 | SHH-CC-3-43                           | -1.759836427 | -1.026938726 |
| 1516 | C22H26N4O3S2   | 458.597 | SHH-CC-3-44                           | -1.508211851 | 1.083978847  |
| 1517 | C21H30N4O3S    | 418.553 | SHH-CC-3-45                           | -1.147475939 | -1.078477876 |
| 1518 | C21H23FN4O3S   | 430.496 | SHH-CC-3-46                           | -1.00360043  | -1.205814997 |
| 1519 | C22H26N4O3S2   | 458.597 | SHH-CC-3-47                           | -1.28041064  | 1.026360951  |
| 1520 | C22H26N4O3S    | 426.532 | SHH-CC-3-48                           | -1.343123692 | -1.017727412 |
| 1521 | C13H20N2O      | 220.311 | SHH-CC-4-1                            | 1.071526518  | 1.043599074  |
| 1522 | C15H15FN2O     | 258.291 | SHH-CC-4-2                            | 1.079437377  | -1.160302976 |
| 1523 | C15H15FN2O     | 258.291 | SHH-CC-4-3                            | -1.13237529  | 1.195860235  |
| 1524 | C16H15F3N2O    | 308.298 | SHH-CC-4-4                            | -1.070384773 | -1.086917174 |
| 1525 | C16H15F3N2O    | 308.298 | SHH-CC-4-5                            | 2.352970026  | -1.278907078 |
| 1526 | C19H18N2O      | 290.359 | SHH-CC-4-6                            | 1.403117516  | 1.179205893  |
| 1527 | C15H16N2O      | 240.3   | SHH-CC-4-7                            | -1.013864376 | 1.09919449   |
| 1528 | C16H18N2O      | 254.327 | SHH-CC-4-8                            | -1.140181635 | -1.011471447 |
| 1529 | C16H15F3N2O    | 308.298 | SHH-CC-4-9                            | 3.096545492  | 1.319662786  |
| 1530 | C16H18N2O      | 254.327 | SHH-CC-4-10                           | 1.111832232  | 1.135755389  |
| 1531 | C16H18N2O      | 254.327 | SHH-CC-4-11                           | 1.014560936  | 1.125520753  |
| 1532 | C15H15CIN2O    | 274.745 | SHH-CC-4-12                           | -1.196777907 | -1.008404672 |
| 2124 | C18H28N2O3     | 320.427 | Benzene hexachloride -<br>Chemservice | 1.263341146  | -1.116924746 |
| 2125 | C17H14N2O4S    | 342.369 | Lindane - Chemservice                 | 5.263558618  | 1.069379671  |
| 2126 | C21H20N2O4S    | 396.459 | Chlorodane - Chemservice              | 1.386075685  | 1.14935124   |
| 2127 | C19H18N2O4S    | 370.422 | Endrin - Chemservice                  | 8.324802718  | 1.292042836  |
| 2128 | C6H7NO2S       | 157.19  | Toxaphene - Chemservice               | 1.116296056  | 1.030572647  |

|      |               |         |                                             |              |              |
|------|---------------|---------|---------------------------------------------|--------------|--------------|
| 2130 | C24H27N3O3S   | 437.554 | Thiodan - Chemservice                       | 1.726321311  | 1.15178904   |
| 2131 | C28H32N4O3S   | 504.644 | 4,4'-Dichloro-a-(trichloromethyl)benzhydryl | 12.3446442   | -1.018845312 |
| 2132 | C25H21F3N4O3S | 514.519 | Methoxychlor - Chemservice                  | 4.509423196  | -1.147784607 |
| 2133 | C27H25F3N4O3S | 542.573 | Baythroid - Chemservice                     | -1.016007399 | -1.024107116 |
| 2134 | C27H23N3O4S   | 485.554 | a-Cypermethrin                              | 1.070259756  | -1.203505542 |
| 2135 | C17H14F3N3O2S | 381.372 | d-(cis/trans)phenothrin                     | 3.715540558  | 1.059913216  |
| 1533 | C17H20N2O     | 268.354 | SHH-CC-4-13                                 | -1.110153519 | -1.074148905 |
| 1534 | C16H18N2O2    | 270.326 | SHH-CC-4-14                                 | -1.118093402 | -1.135507431 |
| 1535 | C15H15N3O3    | 285.298 | SHH-CC-4-15                                 | -1.016552016 | 1.179019105  |
| 1536 | C15H15N3O3    | 285.298 | SHH-CC-4-16                                 | 1.065212482  | 1.044339402  |
| 1537 | C15H15N3O3    | 285.298 | SHH-CC-4-17                                 | 1.21186093   | 1.063110747  |
| 1538 | C15H14F2N2O   | 276.281 | SHH-CC-4-18                                 | 1.150942126  | -1.01225423  |
| 1539 | C15H15BrN2O   | 319.196 | SHH-CC-4-19                                 | -1.407120176 | -1.044879117 |
| 1540 | C16H18N2O2    | 270.326 | SHH-CC-4-20                                 | -1.028391363 | -1.188836523 |
| 1541 | C16H18N2O2    | 270.326 | SHH-CC-4-21                                 | -1.046225447 | -1.020360544 |
| 1542 | C15H15ClN2O   | 274.745 | SHH-CC-4-22                                 | 1.135094971  | 1.073319893  |
| 1543 | C16H15F3N2O2  | 324.298 | SHH-CC-4-23                                 | 1.07804263   | 1.030458565  |
| 1544 | C16H15F3N2O2  | 324.298 | SHH-CC-4-24                                 | 1.928819384  | -1.038309977 |
| 1545 | C15H15BrN2O   | 319.196 | SHH-CC-4-25                                 | -1.031956574 | 1.015548374  |
| 1546 | C15H14Cl2N2O  | 309.19  | SHH-CC-4-26                                 | -1.001936636 | 1.012084699  |
| 1547 | C15H15ClN2O   | 274.745 | SHH-CC-4-27                                 | -1.012440689 | -1.011050653 |
| 1548 | C15H15BrN2O   | 319.196 | SHH-CC-4-28                                 | -1.019573703 | -1.119340442 |
| 1549 | C19H26N2O     | 298.423 | SHH-CC-4-29                                 | -1.015393603 | -1.02270883  |
| 1550 | C21H28N2O     | 324.46  | SHH-CC-4-30                                 | -1.160721662 | -1.18665337  |
| 1551 | C17H20N2O     | 268.354 | SHH-CC-4-31                                 | 1.072143139  | 1.021870501  |
| 1552 | C19H18N2O     | 290.359 | SHH-CC-4-32                                 | 1.484037613  | 1.045301677  |
| 1553 | C15H15IN2O    | 366.197 | SHH-CC-4-33                                 | 1.35982327   | 1.109359477  |
| 1554 | C16H18N2OS    | 286.392 | SHH-CC-4-34                                 | 1.007821622  | 1.091216404  |
| 1555 | C22H20N2O     | 328.407 | SHH-CC-4-35                                 | -1.212656384 | 1.124377321  |
| 1556 | C22H22N2O     | 330.423 | SHH-CC-4-36                                 | -1.232989135 | -1.029712165 |
| 1557 | C14H20N2O     | 232.321 | SHH-CC-4-37                                 | -1.035452693 | 1.15726655   |
| 1558 | C18H22N2O     | 282.38  | SHH-CC-4-38                                 | -1.165559904 | -1.007038917 |
| 1559 | C16H24N2O     | 260.375 | SHH-CC-4-39                                 | 1.105960001  | 1.187139273  |
| 1560 | C17H26N2O     | 274.401 | SHH-CC-4-40                                 | -1.07422359  | -1.045628954 |
| 1562 | C15H15IN2O    | 366.197 | SHH-CC-4-42                                 | -1.065495276 | 1.105861521  |
| 1563 | C15H15IN2O    | 366.197 | SHH-CC-4-43                                 | -1.132514542 | 1.049053333  |
| 1564 | C16H18N2OS    | 286.392 | SHH-CC-4-44                                 | -1.094910631 | 1.337878973  |
| 1566 | C15H15FN2O    | 258.291 | SHH-CC-4-46                                 | 1.041069445  | 1.073218306  |
| 1567 | C16H18N2OS    | 286.392 | SHH-CC-4-47                                 | 1.041128123  | -1.087909355 |
| 1568 | C16H18N2O     | 254.327 | SHH-CC-4-48                                 | 1.115486281  | 1.147202255  |
| 1569 | C39H43N5O5    | 661.789 | Cri-02-13                                   | 1.055465427  | -1.203907547 |
| 1578 | C22H30N4O2    | 382.499 | pdj-vi-12b                                  | 1.368067946  | 1.100588254  |
| 1579 | C22H30N4O2    | 382.499 | pdj-vi-12a                                  | 1.05303599   | 1.01299917   |



|      |              |         |               |              |              |
|------|--------------|---------|---------------|--------------|--------------|
| 1580 | C23H32N4O2   | 396.526 | pdj-vi-13b    | -1.010166614 | -1.09843639  |
| 1581 | C23H32N4O2   | 396.526 | pdj-vi-13a    | -1.083464279 | -1.090862531 |
| 1582 | C31H38N2O3   | 486.645 | KIH-320-73    | -1.113181717 | 1.144554822  |
| 1583 | C34H46N2O6   | 578.739 | KIH-320-80B   | 1.235896164  | -1.047163771 |
| 1584 | C27H40N2O5   | 472.617 | KIH-320-85B   | -1.523149491 | 1.130366032  |
| 1585 | C28H34N4O3   | 474.595 | KIH-320-54    | 1.153011805  | 1.100508595  |
| 1586 | C28H34N2O4   | 462.581 | KIH-320-69    | 1.298094884  | -1.115550617 |
| 1587 | C21H28N2O4   | 372.458 | KIH-320-69B   | 1.074752279  | 1.088011628  |
| 1588 | C21H26F2N2O4 | 408.439 | KIH-320-74    | 3.697899532  | 1.100796036  |
| 1589 | C19H22F2N2O4 | 380.386 | KIH-320-74B   | 1.102512087  | 1.060171905  |
| 1590 | C21H26N2O4   | 370.442 | KIH-320-83    | 5.054372041  | 1.132781729  |
| 1591 | C17H21CIN2O2 | 320.814 | KIH-320-64    | 1.743822095  | 1.072815293  |
| 1592 | C23H32CIN3O3 | 433.971 | KIH-320-64B   | -1.007287448 | -1.061311207 |
| 1593 | C23H32CIN3O3 | 433.971 | KIH-320-65B   | -1.429765929 | -1.161629615 |
| 1594 | C19H34N2O2   | 322.485 | KIH-320-84A   | -1.329331027 | -1.075579359 |
| 1595 | C20H36N2O2   | 336.512 | KIH-320-84-2  | -1.126077421 | 1.236813806  |
| 1596 | C21H38N2O2   | 350.539 | KIH-320-84-1  | -1.000082734 | 1.053005904  |
| 1597 | C21H27NO3    | 341.444 | KIH-320-86A   | 1.485055988  | 1.334108348  |
| 1598 | C19H23NO3    | 313.391 | KIH-320-86B   | 1.67691994   | 1.004398103  |
| 1599 | C18H23NO2    | 285.381 | KIH-320-87    | 1.010253569  | -1.150734123 |
| 1600 | C18H22N2O3   | 314.379 | KIH-320-43-Re | -1.034767808 | 1.182277871  |
| 1601 | C24H31NO2    | 365.508 | HHZ-007       | 1.574241179  | 1.027257744  |
| 1602 | C22H27NO2    | 337.455 | HHZ-008       | 1.210582732  | 1.251419596  |
| 1603 | C15H15NO2    | 241.285 | HHZ-009       | 1.081219561  | 1.291817587  |
| 1604 | C17H19NO2    | 269.338 | HHZ-010       | -1.319098701 | -1.083927415 |
| 1605 | C19H23NO2    | 297.391 | HHZ-011       | 1.810433476  | 1.061694253  |
| 1606 | C25H19NO2    | 365.424 | HHZ-012       | 1.694269629  | -1.011131454 |
| 1607 | C20H17NO2    | 303.354 | HHZ-013       | 1.589138732  | -1.01597803  |
| 1608 | C17H19NO2    | 269.338 | HHZ-014       | 1.257452983  | 1.003337284  |
| 1609 | C19H23NO2    | 297.391 | HHZ-015       | 3.296109735  | 1.303495699  |
| 1610 | C21H27NO2    | 325.445 | HHZ-016       | 2.798035115  | 1.100697705  |
| 1611 | C27H23NO2    | 393.477 | HHZ-017       | -1.155683387 | -1.053577797 |
| 1612 | C22H21NO2    | 331.408 | HHZ-018       | 4.638603542  | -1.0157475   |
| 1613 | C28H31NO3    | 429.551 | HHZ-019       | 1.707947326  | 1.044648298  |
| 1614 | C26H36N2O4   | 440.575 | SHH02-084     | 1.270021243  | 1.36174017   |
| 1615 | C26H36N2O4   | 440.575 | SHH02-085     | 1.245621058  | -1.000297259 |
| 1616 | C24H32N2O4   | 412.522 | SHH02-090     | 1.080008554  | 1.046711521  |
| 1643 | C21H17F2NO2  | 353.362 | HHZ-020       | -1.160437512 | 1.06709958   |
| 1648 | C22H35N3O4   | 405.531 | PDJ-vi-29a    | 1.081750446  | 1.04468234   |
| 1649 | C21H33N3O4   | 391.504 | PDJ-vi-29b    | -1.08271924  | 1.28629387   |
| 1650 | C21H33N3O4   | 391.504 | PDJ-vi-27     | -1.013569154 | -1.145381391 |
| 1651 | C20H31N3O4   | 377.478 | PDJ-vi-28     | 1.027637208  | 1.118489607  |
| 1652 | C25H33N3O4   | 439.547 | PDJ-vi-31b    | -1.019700258 | 1.024217099  |
| 1653 | C24H31N3O4   | 425.521 | PDJ-vi-31a    | -1.068222167 | 1.307637986  |
| 1654 | C25H33N3O4   | 439.547 | PDJ-vi-30b    | -1.023846859 | -1.049013834 |

|      |               |         |                 |              |              |
|------|---------------|---------|-----------------|--------------|--------------|
| 1655 | C24H31N3O4    | 425.521 | PDJ-vi-30a      | -1.017890583 | 1.177251533  |
| 1656 | C6H7NO        | 109.126 | SHH-pyr-001     | 1.000730571  | 1.061960816  |
| 1657 | C6H4F3NO      | 163.097 | SHH-pyr-002     | 1.010737576  | -1.053696835 |
| 1658 | C6H7NO2       | 125.125 | SHH-pyr-003     | -1.061390328 | -1.002315383 |
| 1659 | C10H6F3NO     | 213.156 | SHH-Ind-002     | 1.140037514  | -1.257007543 |
| 1660 | C10H9NO2      | 175.184 | SHH-Ind-003     | 1.237355885  | -1.11673153  |
| 1661 | C23H30F3N3O2  | 437.498 | SHH-02-095      | 1.83936621   | 1.100690515  |
| 1662 | C19H20CIFN2O2 | 362.826 | SHH-02-093_Cl   | 1.105161198  | 1.036772366  |
| 1663 | C20H29FN2O2   | 348.455 | SHH-02-093_cHep | 2.495529055  | 1.014583914  |
| 1664 | C19H20BrFN2O2 | 407.277 | SHH-02-093_Br   | -1.097512456 | -1.036424559 |
| 1665 | C20H20F4N2O2  | 396.379 | SHH-02-093_CF3  | 7.230142519  | 1.381797427  |
| 1666 | C19H20FIN2O2  | 454.277 | SHH-02-093_I    | 1.09895193   | -1.162244937 |
| 1667 | C20H20F4N2O3  | 412.378 | SHH-02-093_OCF3 | 10.79360855  | 1.148394299  |
| 1668 | C19H28N2O     | 300.438 | JRS-prop-1      | 1.109361125  | -1.024514272 |
| 1669 | C20H39N5O     | 365.557 | CRI-05-13A      | 1.621186128  | 1.124428067  |
| 1670 | C25H33N3O4    | 439.547 | pdj-vi-32b      | 1.049997107  | 1.057790966  |
| 1671 | C24H31N3O4    | 425.521 | pdj-vi-32a      | 1.04061365   | 1.060625141  |
| 1686 | C19H23NO3     | 313.391 | KIH-320-86B     | 1.510322111  | 1.352322544  |
| 1697 | C14H25N5O     | 279.381 | CRI-05-13B      | -1.089309701 | 1.09220729   |
| 1698 | C18H37N3O     | 311.506 | CRI-08-13-A1    | -1.144983633 | -1.006864246 |
| 1699 | C17H31N3O3    | 325.446 | CRI-08-13-B1    | 1.120761856  | -1.049572649 |
| 1701 | C21H33N3O     | 343.506 | CRI-08-13-C     | 1.367823033  | -1.135137669 |
| 1702 | C15H19N3O     | 257.331 | CRI-08-13-D     | 1.282102923  | -1.029771972 |
| 1703 | C15H18F3N3O3  | 345.317 | PDJ-6-41        | -1.020304476 | -1.013336051 |
| 1704 | C19H28F3N3O2  | 387.44  | PDJ-vi-42-2     | -1.059861927 | 1.02192971   |
| 1705 | C19H16N2O2    | 304.343 | HHZ-021         | 1.164151392  | 1.097808353  |
| 1706 | C21H20N2O2    | 332.396 | HHZ-022         | 1.020443028  | 1.215393721  |
| 1707 | C19H16N2O2    | 304.343 | HHZ-023         | 1.001774408  | 1.012676737  |
| 1766 | C30H38N4O3    | 502.648 | KIH-320-91      | 2.732659333  | -1.107012535 |
| 1708 | C21H20N2O2    | 332.396 | HHZ-024         | 1.826093807  | 1.036232345  |
| 1709 | C17H17NO3     | 283.322 | HHZ-025         | -1.022234621 | -1.038417967 |
| 1710 | C18H19NO3     | 297.348 | HHZ-026         | 2.62370499   | 1.475301208  |
| 1711 | C20H15F2NO2   | 339.335 | HHZ-027         | -1.00258872  | -1.045986988 |
| 1712 | C17H26N2O2    | 290.401 | SHH-03-001      | 1.01722299   | -1.091590311 |
| 1713 | C24H36N2O5    | 432.553 | SHH-03-001      | -1.052964057 | -1.019318694 |
| 1714 | C23H30F3N3O2  | 437.498 | SHH-03-000      | 1.040366272  | -1.001754403 |
| 1716 | C20H32N4O     | 344.494 | CRI-12-13-A     | 1.168043695  | -1.04826692  |
| 1717 | C14H18N4O     | 258.319 | CRI-12-13-B     | 1.480691181  | 1.063183961  |
| 1718 | C13H16F3N3O2  | 303.28  | PDJ-vi-40B      | 1.10501681   | 1.061941435  |
| 1719 | C16H27N3O     | 277.405 | PDJ-iv-1A       | -1.104823497 | 1.156030309  |
| 1881 | C19H21NO2     | 295.376 | HHZ-031         | 1.148343521  | 1.003804018  |
| 1720 | C22H19F2NO2   | 367.389 | HHZ-028         | 4.563870896  | 1.084617745  |
| 1738 | C18H26F3N3O2  | 373.413 | pdj-vi-51       | -1.021277569 | 1.185092771  |
| 1739 | C15H15F6N3O3  | 399.288 | pdj-vi-53       | 1.048139699  | 1.197109194  |
| 1747 | C19H24N2O3    | 328.405 | CRI-13-13-A1    | 1.496605191  | 1.129917099  |

|      |              |         |              |              |              |
|------|--------------|---------|--------------|--------------|--------------|
| 1748 | C18H22N2O3   | 314.379 | CRI-13-13-A2 | -1.061199991 | 1.039319453  |
| 1749 | C17H29N3O    | 291.432 | CRI-13-13-B  | 1.045962785  | -1.287455431 |
| 1750 | C12H23N3O    | 225.331 | CRI-08-13-B3 | 1.086899477  | 1.128080545  |
| 1751 | C18H29N3O2   | 319.442 | pdj-vi-62    | -1.0577884   | 1.786315417  |
| 1752 | C11H24Cl2N4O | 299.24  | pdj-vi-56-1  | 1.01364379   | -1.041178041 |
| 1753 | C25H30N4O3   | 434.531 | pdji-vi-57   | 1.121815462  | -1.079644276 |
| 1754 | C18H26F3N3O2 | 373.413 | pdj-vi-54    | 1.035398715  | 1.167141401  |
| 1755 | C17H29N3O    | 291.432 | pdj-vi-1b-fb | 1.056261812  | -1.143914055 |
| 1756 | C19H20FN3O4  | 373.378 | SHH-030311   | 4.835570919  | 1.106471271  |
| 1757 | C21H23FN2O4  | 386.417 | SHH-03014    | -1.003513955 | -1.016732619 |
| 1758 | C20H21FN2O4  | 372.39  | SHH-03016    | 4.539937841  | -1.071983942 |
| 1759 | C26H36N2O4   | 440.575 | SHH-03023    | 1.021581204  | -1.086898638 |
| 1760 | C23H25F3N2O5 | 466.45  | SHH-03024    | 5.873042887  | -1.109697889 |
| 1761 | C24H28N2O6   | 440.489 | SHH-03025    | 1.07710062   | 1.104462269  |
| 1762 | C27H36N2O6   | 484.585 | SHH-03026    | -1.120612767 | -1.254753958 |
| 1763 | C24H25F3N2O7 | 510.46  | SHH-03027    | 5.761529818  | -1.018977216 |
| 1764 | C25H28N2O8   | 484.498 | SHH-03028    | 1.256709983  | 1.004008052  |
| 1765 | C16H29N3O    | 279.421 | CRI-13-13E   | -1.035359965 | -1.255318223 |
| 1767 | C23H40N2O4   | 408.575 | KIH-320-88   | -1.698228221 | 1.154529671  |
| 1768 | C24H42N2O4   | 422.601 | KIH-320-99   | -1.352154505 | -1.09920318  |
| 1769 | C23H38F2N2O4 | 444.556 | KIH-320-96   | -1.536117534 | -1.013101101 |
| 1770 | C23H31F3N2O4 | 456.498 | KIH-320-93   | 1.433461242  | -1.311755753 |
| 1771 | C18H21FN2O3  | 332.369 | KIH-320-89   | 1.102943136  | 1.690078181  |
| 1772 | C19H22FNO3   | 331.381 | KIH-320-90   | 1.228044127  | 1.481875096  |
| 1773 | C18H22N2O3   | 314.379 | KIH-320.95   | -1.125720371 | 1.494089883  |
| 1789 | C18H28N2O2   | 304.427 | PDJ-VI-74B   | -1.039975225 | 1.120929927  |
| 1790 | C19H30N2O2   | 318.454 | PDJ-VI-74A   | -1.164792983 | 1.189404532  |
| 1791 | C18H25F3N2O2 | 358.399 | PDJ-VI-73B   | 1.0671605    | 1.067992735  |
| 1792 | C19H27F3N2O2 | 372.425 | PDJ-VI-73A   | -1.068171711 | -1.020816901 |
| 1793 | C15H27N3O2   | 281.394 | PDJ-VI-77    | 1.176338925  | 1.095212955  |
| 1794 | C24H26N2O3   | 390.475 | TK-14        | 1.067900013  | -1.05087727  |
| 1795 | C18H24N2O2   | 300.395 | TK-15        | -1.113918442 | 1.243064874  |
| 1796 | C18H21F3N2O2 | 354.367 | TK-16        | 4.585799921  | 1.180134051  |
| 1797 | C18H22F2N2O2 | 336.376 | TK-17        | 2.221156755  | 1.197730781  |
| 1798 | C19H22F4N2O2 | 386.384 | TK-18        | 2.479665621  | 1.689557588  |
| 1799 | C18H21F3N2O  | 338.367 | TK-19        | 2.958799057  | 1.006669868  |
| 1800 | C19H23F3N2O2 | 368.393 | TK-20        | 2.432149769  | 1.038356387  |
| 1801 | C18H22N2O3   | 314.379 | TK-22        | 1.011748652  | 1.157211022  |
| 1802 | C15H20N2O3   | 276.331 | TK-23        | -1.049285468 | 1.16614582   |
| 1803 | C15H11F3N2O3 | 324.255 | TK-24        | 1.293402778  | 1.19265854   |
| 1804 | C19H24N2O3   | 328.405 | TK-25        | 1.834700451  | 1.053283884  |
| 1805 | C16H22N2O3   | 290.357 | TK-26        | 1.258667096  | 1.168693472  |
| 1806 | C16H13F3N2O3 | 338.281 | TK-27        | -1.042378376 | 1.175552224  |
| 1807 | C21H40N2O3   | 368.554 | TK-28        | -1.205873036 | 1.051676436  |
| 1808 | C25H48N2O3   | 424.66  | TK-29        | 1.026992521  | 1.004789215  |

|      |              |         |                    |              |              |
|------|--------------|---------|--------------------|--------------|--------------|
| 1809 | C20H29F3N2O3 | 402.451 | TK-30              | 1.055312167  | -1.049436288 |
| 1810 | C24H37F3N2O3 | 458.557 | TK-31              | 1.193678613  | 1.237141178  |
| 1811 | C20H29F3N2O4 | 418.45  | TK-32              | 1.067257987  | -1.045237908 |
| 1812 | C24H37F3N2O4 | 474.557 | TK-33              | 1.116913053  | 1.03547384   |
| 1813 | C19H24N2O3   | 328.405 | TK-34              | 1.281977841  | 1.060449442  |
| 1814 | C20H26N2O3   | 342.432 | TK-35              | 1.11958793   | 1.219961857  |
| 1815 | C20H26N2O3   | 342.432 | TK-36              | -1.931677019 | -1.334067452 |
| 1816 | C21H28N2O3   | 356.459 | TK-37              | -1.215107595 | -1.455046347 |
| 1817 | C16H13F3N2O4 | 354.281 | TK-38              | 5.644724765  | 1.213498421  |
| 1818 | C15H11F3N2O4 | 340.254 | TK-39              | 1.202533709  | -1.169633757 |
| 1819 | C19H24N2O4   | 344.405 | TK-40              | 4.895920989  | 1.053415796  |
| 1820 | C18H22N2O4   | 330.378 | TK-41              | -1.014948942 | 1.013886966  |
| 1821 | C25H28N2O2   | 388.502 | TK-42              | 2.919617775  | 1.246218734  |
| 1822 | C21H25FN2O2  | 356.434 | SHH-03-047         | 1.002348723  | -1.013617117 |
| 1823 | C24H32N2O4   | 412.522 | SHH-03-042         | -1.051190102 | -1.047038165 |
| 1824 | C21H22N2O6   | 398.409 | SHH-03-044         | -1.037321657 | -1.047415915 |
| 1825 | C24H31FN2O   | 382.514 | SHH-03-032         | 1.062535577  | -1.097004537 |
| 1826 | C24H33FN2O   | 384.53  | SHH-03-040         | 1.255760921  | 1.050221571  |
| 1827 | C21H23FN2O4  | 386.417 | SHH-03-014         | 3.482612015  | 1.033993636  |
| 1828 | C24H32FNO2   | 385.515 | SHH-03-035         | 3.082995843  | 1.1549126    |
| 1829 | C20H21FN2O4  | 372.39  | SHH-03-016         | 1.093966071  | -1.026394355 |
| 1830 | C16H22N2O3   | 290.357 | SHH-03-033         | 1.105872355  | 1.234065063  |
| 1831 | C9H8F2O4     | 218.154 | SHH-03-057_MOM     | -1.240493882 | 1.16480757   |
| 1832 | C21H23FN2O4  | 386.417 | SHH-03-039         | 2.271740741  | -1.148309662 |
| 1833 | C14H20N2O    | 232.321 | SHH-03-029         | 1.075555175  | -1.068645401 |
| 1834 | C21H21F3N2O5 | 438.397 | SHH-03-043         | 1.573809732  | -1.02844308  |
| 1835 | C20H21FN2O4  | 372.39  | SHH-03-046         | 1.090162152  | 1.147703846  |
| 1836 | C15H28N2O    | 252.396 | SHH-03-056_cHep    | 1.133146327  | 1.170222307  |
| 1837 | C15H26N2O2   | 266.379 | SHH-03-049         | -1.038160989 | 1.097156572  |
| 1838 | C13H10Br2N2O | 370.039 | SHH-03-056_Br      | -1.241900509 | 1.199599546  |
| 1839 | C21H20N2O9   | 444.392 | SHH-03-056_mpCO2Me | -1.111383749 | -1.184118066 |
| 1840 | C13H10I2N2O  | 464.04  | SHH-03-056_I       | -1.170364638 | -1.106211642 |
| 1841 | C17H16N2O5   | 328.319 | SHH-03-056_pCO2Me  | 1.046166091  | -1.117407048 |
| 1842 | C13H10Cl2N2O | 281.137 | SHH-03-056_Cl      | 1.083541573  | -1.020894749 |
| 1843 | C17H16N2O5   | 328.319 | SHH-03-056_MCO2Me  | 1.242029773  | 1.086406288  |
| 1844 | C15H10F6N2O  | 348.243 | SHH-03-056_CF3     | 9.443480774  | 2.479402028  |
| 1845 | C23H25FN2O6  | 444.453 | SHH-03-038         | 1.448766944  | -1.166936359 |
| 1846 | C15H10F6N2O3 | 380.242 | SHH-03-056_OCF3    | 6.269757144  | -1.204749464 |
| 1847 | C21H21FN2O6  | 416.4   | SHH-03-045         | 1.061523448  | -1.020075785 |
| 1848 |              |         | Cri-26-13A         | -1.075568591 | -1.116127603 |
| 1849 | C17H29N3O3S  | 355.495 | PDJ-VI-87          | -1.035990988 | 1.04437022   |
| 1850 | C18H29N3O3   | 335.441 | PDJ-VI-89          | 1.092455292  | -1.049064062 |
| 1851 | C21H22N2O6   | 398.409 | SHH-03-044         | -1.007068397 | -1.01218315  |
| 1852 | C17H12N2O9   | 388.285 | SHH-03-060         | 1.093397001  | -1.015280555 |
| 1853 | C23H32FN3O   | 385.518 | SHH-03-022         | 1.026011271  | -1.280514771 |

|      |                |         |                  |              |              |
|------|----------------|---------|------------------|--------------|--------------|
| 1854 | C15H12N2O5     | 300.266 | SHH-03-058       | -1.145666835 | -1.041686679 |
| 1855 | C21H29FN2O2    | 360.466 | SHH-03-062       | 1.297735426  | 1.021773875  |
| 1856 | C15H12N2O5     | 300.266 | SHH-03-058       | -1.193928331 | -1.026608182 |
| 1857 | C14H18F3N3O4S  | 381.371 | PDJ-VII-3b       | 1.02788663   | -1.010925584 |
| 1858 | C25H27F3N4O4S  | 536.566 | PDJ-VII-5        | 10.53892076  | 1.133760354  |
| 1859 | C20H22F3N3O4S  | 457.467 | PDJ-VII-3a       | 5.370647683  | 1.038000283  |
| 1860 | C15H18F3N3O3   | 345.317 | PDJ-VII-4        | 1.122095152  | 1.140540549  |
| 1861 | C19H30N2O      | 302.454 | JRS-Pr-2         | 1.054475475  | -1.062380532 |
| 1862 | C25H42N2O      | 386.614 | JRS-Pr-4         | -1.169487886 | 1.01242085   |
| 1863 | C25H44N2O      | 388.63  | JRS-Pr-7         | -1.157625413 | 1.000676843  |
| 1864 | C22H26N2O3     | 366.453 | JRS-Pr-3         | 1.049677649  | -1.186478176 |
| 1865 | C22H28N2O3     | 368.469 | JRS-Pr-6         | 1.072753027  | 1.240800507  |
| 1866 | C20H22N2O3     | 338.4   | JRS-Pr-5         | 1.32250906   | 1.14266384   |
| 1867 | C20H24N2O3     | 340.416 | JRS-Pr-8         | 1.068717666  | 1.173738303  |
| 1868 | C23H25FN2O2    | 380.455 | SHH-03_070       | 3.878358764  | -1.003699008 |
| 1869 | C10H9NO2       | 175.184 | SHH-In-3-OAc     | 1.325079109  | 1.165543445  |
| 1870 | C9H7NO         | 145.158 | SHH-In-3-CHO     | -1.007277482 | 1.063752433  |
| 1871 | C17H25NO3      | 291.385 | Capsaicin        | 1.163490501  | 1.086474272  |
| 1872 | C19H21CIN2O2S  | 376.9   | capsazepine      | 1.137033356  | 1.064803125  |
| 1873 | C9H7NO2        | 161.157 | 5-methylisatin   | 1.066683832  | -1.038276207 |
| 1874 | CH3N5          | 85.068  | 5-aminotetrazole | 1.039380372  | 1.075898842  |
| 1875 | C8H9N5         | 175.191 | SHH-03-084       | -1.044420939 | -1.052595083 |
| 1876 | C21H21F3N2O5   | 438.397 | SHH-03-078       | 1.128544633  | 1.125369111  |
| 1877 | C20H20F4N2O3   | 412.378 | SHH-03-079       | 1.649356838  | 1.326184427  |
| 1878 | C19H19Cl2FN2O2 | 397.271 | SHH-03-080       | 1.306339773  | 1.092044373  |
| 1879 | C24H30FN2O2    | 397.506 | SHH-03-081       | 1.00601907   | -1.048080047 |
| 1880 | C21H25FN2O2    | 356.434 | SHH-03-082       | 1.049944908  | -1.064635989 |
| 1882 | C19H29N3O      | 315.453 | HHZ-032          | 1.014121362  | 1.025200345  |
| 1884 | C16H19N3O2     | 285.341 | HHZ-034          | -1.009469087 | 1.071031352  |
| 1885 | C17H21N3O2     | 299.368 | HHZ-035          | 1.034636519  | -1.126572055 |
| 1886 | C18H23N3O2     | 313.394 | HHZ-036          | 1.004450475  | -1.106690194 |
| 1887 | C19H25N3O2     | 327.421 | HHZ-037          | 1.026257125  | 1.03740778   |
| 1888 | C18H23N3O      | 297.395 | HHZ-038          | -1.025848122 | -1.137964262 |
| 1889 | C18H23N3O      | 297.395 | HHZ-039          | -1.171575071 | -1.241852071 |
| 1890 | C16H18N2O2     | 270.326 | HHZ-040          | 1.067056081  | -1.089207945 |
| 1891 | C14H27N3O3S    | 317.447 | PDJ-vii-45       | 1.060032349  | -1.001813407 |
| 1892 | C22H22F3N3O5   | 465.422 | PDJ-vii-42e      | 1.011624883  | -1.229932606 |
| 1893 | C18H22F3N3O5   | 417.38  | PDJ-vii-50       | 1.028838928  | 1.034020095  |
| 1894 | C22H22F3N3O5   | 465.422 | PDJ-vii-42c      | -1.070440081 | -1.131000082 |
| 1895 | C22H22F3N3O5   | 465.422 | PDJ-vii-42d      | -1.142801417 | 1.101927241  |
| 1896 | C18H22F3N3O5   | 417.38  | PDJ-vii_42a      | -1.118577775 | 1.094262097  |
| 1897 | C21H20F3N3O5   | 451.396 | PDJ-vii-46d      | 1.060784665  | -1.129121825 |
| 1898 | C17H20F3N3O5   | 403.353 | PDJ-vii-49a      | -1.156760423 | 1.082789574  |
| 1899 | C19H24F3N3O5   | 431.406 | PDJ-vii-42b      | -1.035072498 | -1.085114858 |
| 1900 | C21H20F3N3O5   | 451.396 | PDJ-vii-46e      | -1.038033292 | 1.104452579  |

|      |               |         |              |              |              |
|------|---------------|---------|--------------|--------------|--------------|
| 1901 | C21H20F3N3O5  | 451.396 | PDJ-vii-49b  | -1.140933323 | 1.018952232  |
| 1902 | C23H31FN2O2   | 386.503 | SHH-03-091   | -1.091009329 | -1.152665195 |
| 1903 | C25H34N2O4    | 426.548 | SHH-03-093   | 1.080910863  | -1.185526051 |
| 1904 | C24H32N2O4    | 412.522 | SHH-04-002   | 1.113375236  | -1.118538755 |
| 1905 | C21H21F3N2O5  | 438.397 | SHH-03-097   | 1.517212134  | -1.076333662 |
| 1906 | C24H32F2N2O2  | 418.52  | SHH-03-086   | 1.007666139  | -1.049672603 |
| 1907 | C25H32N2O     | 376.534 | PR-9         | -1.030597714 | 1.181715184  |
| 1908 | C25H36N2O     | 380.566 | PR-10        | -2.489051245 | -2.340273995 |
| 1909 | C19H20F3N3O4S | 443.44  | PDJ-vii-61   | 1.894760818  | -1.050831956 |
| 1910 | C14H21N3O3S   | 311.4   | PDJ-vii-71-1 | 1.340151096  | -1.331756823 |
| 1911 | C15H23N3O3S   | 325.426 | PDJ-vii-74   | 1.063003404  | -1.017008131 |
| 1912 | C12H17N3O3S   | 283.347 | PDJ-vii-76   | -1.018091964 | -1.087882881 |
| 1913 | C16H20F3N3O3  | 359.344 | PDJ-vii-58a  | -1.099682501 | 1.010006881  |
| 1914 | C17H22F3N3O3  | 373.37  | PDJ-vii-58B  | -1.066456491 | 1.080791728  |
| 1915 | C19H16CINO4   | 357.788 | Indometacin  | -1.021726514 | 1.015758794  |
| 1916 | C14H14O3      | 230.259 | Naproxen     | -1.718727754 | -1.165457327 |
| 1917 | C16H13F3N2O5  | 370.28  | TK-43        | 4.639903786  | -1.179978498 |
| 1918 | C15H11F3N2O5  | 356.253 | TK-44        | -1.119002843 | -1.115806135 |
| 1919 | C17H22N2O     | 270.369 | TK-45        | 1.133990699  | 1.073651783  |
| 1920 | C17H22N2O2    | 286.369 | TK-46        | -1.157734605 | -1.131176723 |
| 1921 | C17H22N2O2    | 286.369 | TK-47        | 1.17047399   | 1.006716398  |
| 1922 | C18H24N2O     | 284.396 | TK-48        | -1.151809467 | 1.060611855  |
| 1923 | C23H26N2O2    | 362.465 | TK-49        | 3.605833779  | 1.012104182  |
| 1924 | C18H24N2O2    | 300.395 | TK-50        | 1.116578876  | -1.16926604  |
| 1925 | C22H30N2O3    | 370.485 | TK-51        | -1.741887092 | -3.926142526 |
| 1926 | C21H28N2O3    | 356.459 | TK-52        | -2.395639491 | -2.69492617  |
| 1927 | C29H52N2O3    | 476.735 | KIH-354-04-1 | -1.081227807 | 1.231158235  |
| 1928 | C28H50N2O3    | 462.708 | KIH-354-04-3 | 1.172162049  | 1.173190625  |
| 1929 | C23H32N2O3    | 384.512 | KIH-354-11   | -1.550636933 | -1.469163598 |
| 1930 | C30H44N2O5    | 512.681 | KIH-354-08   | -1.030732571 | 1.029532151  |
| 1931 | C25H28N2O3    | 404.501 | KIH-354-06   | 5.224484965  | 1.241008156  |
| 1932 | C29H40N2O5    | 496.638 | KIH-354-10   | -1.008176553 | -1.030587481 |
| 1933 | C37H50N2O6    | 618.803 | KIH-354-09   | -1.006932692 | 1.058020752  |
| 1934 | C25H34N2O3    | 410.549 | KIH-354-07   | -4.189449044 | -2.345746448 |
| 1935 | C26H30N2O3    | 418.528 | KIH-354-13   | 1.561998058  | 1.016003733  |
| 1936 | C18H24N2O2    | 300.395 | KIH-354-18   | 1.256772614  | -1.308724714 |
| 1937 | C20H29F3N2O4  | 418.45  | KIH-354-15   | -1.064305255 | 1.065246751  |
| 1938 | C18H24N2O5    | 316.461 | KIH-354-20   | 1.579441209  | 1.336372104  |
| 1939 | C19H24N2O4    | 344.405 | KIH-354-25   | -2.686020035 | -1.727273713 |
| 1940 | C19H24N2O3    | 328.405 | KIH-354-17   | 2.535349333  | 1.141469015  |
| 1941 | C18H22N2O4    | 330.378 | KIH-354-26   | -1.033227903 | -1.027121351 |
| 1942 | C22H32N2O2    | 356.502 | KIH-354-14   | -2.529979032 | -1.976612409 |
| 1943 | C19H25N3O2    | 327.421 | KIH-354-22   | 1.243996396  | 1.171775966  |
| 1944 | C29H56N2O2    | 464.767 | KR-I-88-22   | 1.003581934  | -1.039295248 |
| 1945 | C29H50N2O2    | 458.719 | KR-I-77-22   | -1.249951104 | 1.005735285  |

|      |              |         |              |              |              |
|------|--------------|---------|--------------|--------------|--------------|
| 1946 | C29H56N2O3   | 480.767 | KR-I-104-28  | -1.237230971 | -1.664456447 |
| 1947 | C19H36N2O3   | 340.501 | KR-I-58-23   | -1.111194593 | -1.122828453 |
| 1948 | C23H32N2O    | 352.513 | JRS-PR-11    | 2.622357715  | 1.048920791  |
| 1949 | C24H39N3O3   | 417.585 | JRS-PR-12    | 1.227108929  | -1.073765392 |
| 1950 | C22H28N2O3   | 368.469 | JRS-PR-13    | -1.834105805 | -1.116842215 |
| 1951 | C25H42N2O3   | 418.613 | JRS-PR-14    | -1.145264085 | 1.230109025  |
| 1952 | C25H38N4O2   | 426.595 | LH-23        | -1.052642791 | -1.094329172 |
| 1953 | C24H36N4O2   | 412.568 | LH-24        | 1.034395301  | 1.077575177  |
| 1954 | C29H44N4O4   | 512.684 | LH-25        | -1.02257619  | -1.17149013  |
| 1955 | C26H38N4O3   | 454.605 | LH-26        | -1.742293881 | -1.11438311  |
| 1956 | C25H38N4O2   | 426.595 | LH-27        | -2.610828287 | -1.368987286 |
| 1957 | C24H36N4O2   | 412.568 | LH-28        | -1.839935999 | -1.552096151 |
| 1958 | C29H44N4O4   | 512.684 | LH-29        | -2.182062496 | -1.537683367 |
| 1959 | C26H38N4O3   | 454.605 | LH-30        | -1.190376729 | -1.131525145 |
| 1960 | C25H38N4OR   | 410.595 | LH-31        | 1.050049308  | -1.268715377 |
| 1961 | C24H36N4OR   | 396.569 | LH-32        | -1.152740508 | -1.023552585 |
| 1962 | C29H44N4O3R  | 496.685 | LH-33        | -1.753114699 | -1.067085692 |
| 1963 | C26H38N4O2R  | 438.606 | LH-34        | -1.127978302 | -1.24350258  |
| 1964 | C26H40N4O2   | 440.621 | LH-35        | 1.031307525  | 1.086140588  |
| 1965 | C25H38N4O2   | 426.595 | LH-36        | -1.020938412 | 1.061252711  |
| 1966 | C30H46N4O4   | 526.711 | LH-37        | -1.7990689   | -2.062792758 |
| 1967 | C27H40N4O3   | 468.632 | LH-38        | 1.05529138   | 1.645097     |
| 1968 | C26H40N4O2   | 440.621 | LH-39        | 1.110364573  | 1.156900963  |
| 1969 | C25H38N4O2   | 426.595 | LH-40        | 1.139866767  | 1.061677334  |
| 1970 | C30H46N4O4   | 526.711 | LH-41        | -1.154007153 | -1.033304321 |
| 1971 | C27H40N4O3   | 468.632 | LH-42        | 1.085715408  | 1.178584477  |
| 1972 | C26H40N4O2   | 440.621 | LH-43        | -1.088357152 | 1.181735746  |
| 1973 | C25H38N4O2   | 426.595 | LH-44        | -1.182762695 | 1.14723139   |
| 1974 | C30H46N4O4   | 526.711 | LH-45        | -2.239725359 | -1.677848348 |
| 1975 | C27H40N4O3   | 468.632 | LH-46        | -2.283335954 | -1.078892562 |
| 1976 | C16H27N3O    | 277.405 | LH-47        | 1.066413656  | -1.072709364 |
| 1977 | C15H25N3O    | 263.378 | LH-48        | -1.005834742 | -1.025626577 |
| 1978 | C21H35N3O3   | 377.521 | LH-49        | 1.129931542  | 1.072427208  |
| 1979 | C16H27N3O    | 277.405 | LH-50        | -1.008418903 | -1.049345926 |
| 1980 | C18H23F3N2O3 | 372.382 | LH-51        | -1.335783728 | -1.064113212 |
| 1981 | C13H15F3N2O  | 272.266 | LH-52        | -1.333961928 | -1.016006828 |
| 1982 | C25H41N5O3   | 459.625 | LH-53        | -1.774933542 | -1.595728423 |
| 1983 | C30H49N5O5   | 559.741 | LH-54        | -2.002876132 | 1.012540611  |
| 1984 | C27H43N5O4   | 501.661 | LH-55        | -2.77738284  | -1.273368991 |
| 1985 | C19H30CIN3O2 | 367.913 | LH-56        | 1.361909874  | 1.001693802  |
| 1986 | C23H41N3O2   | 391.591 | TK-358-27-54 | -1.247545006 | -1.230437785 |
| 1987 | C23H41N3O3   | 407.59  | TK-358-32-55 | -1.058951031 | 1.001301269  |
| 1988 | C24H40N4O2   | 416.6   | TK-358-49-59 | -1.103966355 | -1.026818975 |
| 1989 | C19H24N2O3   | 328.405 | TK-358-39-56 | 1.079287069  | 1.075194509  |
| 1990 | C18H22N2O3   | 314.379 | TK-358-48-58 | -1.102307321 | 1.147958313  |

|      |               |         |                                        |              |              |
|------|---------------|---------|----------------------------------------|--------------|--------------|
| 1991 | C19H24N2O2    | 312.406 | TK-358-42-57                           | -1.103859822 | -1.012462648 |
| 1992 | C26H28N2O5    | 448.511 | TK-358-23-53                           | 3.122670195  | -1.129103957 |
| 1993 | C9H8O4        | 180.157 | Aspirin                                | 1.030765137  | 1.012158492  |
| 1994 | C14H26N2O     | 238.369 | MG-XXX-19A                             | 1.731957226  | -1.066111869 |
| 1995 | C13H17BrN2O   | 297.191 | MG-XXX-66A                             | 1.2038546    | 1.107376682  |
| 2136 | C18H29N3O2    | 319.442 | Resmethrin                             | 1.530277027  | -1.066053814 |
| 2137 | C15H18F3N3O3  | 345.317 | Bifenthrin                             | 1.192495912  | -1.027762911 |
| 2138 | C17H20F3N3O5  | 403.353 | Asana - Chemservice                    | 1.105372493  | 1.322594995  |
| 2139 | C23H37N3O3    | 403.558 | zeta-cypermethrin                      | 1.342053734  | -1.049490247 |
| 2140 | C17H28N2O2    | 292.416 | Deltamethrin                           | 1.130496821  | 1.06983749   |
| 2141 | C17H28N2O2    | 292.416 | Pyrethrum                              | 1.15544164   | -1.002966089 |
| 2142 | C26H36N2O4    | 440.575 | Pyrethrum                              | 2.412639306  | -1.08359278  |
| 2143 | C24H32N2O4    | 412.522 | Cypermethin (mix of isomers)           | -1.100819573 | 1.152749098  |
| 2144 | C24H31N3O2    | 393.522 | trans-Cypermethrin                     | 1.001953955  | -1.345085717 |
| 2145 | C21H21F3N2O5  | 438.397 | Sanmarton                              | 1.085579186  | -1.036045254 |
| 2146 | C21H21F3N2O5  | 438.397 | cis-cypermethrin                       | 1.132464107  | 1.166185452  |
| 2147 | C21H22N2O6    | 398.409 | Oxyfluorfen                            | 1.731710879  | 1.058056861  |
| 2148 | C23H32FN3O    | 385.518 | Diuron                                 | 1.085429054  | -1.108483072 |
| 2149 | C17H16N2O3S   | 328.386 | Diflubenzuron                          | -1.104256671 | 1.060960262  |
| 2150 | C16H14N2O     | 250.295 | Monuron - Chemservice                  | 1.086930963  | 1.096937949  |
| 2151 | C21H40N2O3    | 368.554 | Fenuron - Chemservice                  | 1.136908742  | -1.107353866 |
| 2152 | C19H36N2O2S   | 356.566 | 1-Naphthaleneacetamide                 | -1.059654859 | 1.006813616  |
| 2153 | C19H35NO4     | 341.486 | 1-Naphthaleneacetic acid               | 1.093155361  | -1.011896875 |
| 2154 | C22H36O3      | 348.519 | 1-Naphthaleneacetic acid, methyl ester | 1.053962576  | 1.015418372  |
| 2155 | C20H38N2O3    | 354.527 | Chloroacetic acid                      | 1.192895232  | -1.115444796 |
| 2156 | C19H35NO4     | 341.486 | 2,2-dichloropropionic acid             | 1.199096394  | -1.081786309 |
| 2158 | C19H28N2O2    | 316.438 | Trichloroacetic acid                   | 1.075011799  | -1.026530051 |
| 2159 | C14H9Cl2F3N2O | 349.135 | 2-Naphthoxyacetic acid                 | -1.054343146 | -1.126729638 |
| 2160 | C21H39O6P     | 418.505 | Phenoxyacetic acid                     | -1.012647339 | -1.136080688 |
| 2161 | C20H26F3N3O4  | 429.433 | 2-Phenoxypropionic acid                | 1.042690285  | -1.032278402 |
| 2162 | C17H22F3N3O4  | 389.369 | 3-Indolebutyric acid                   | 1.158738443  | 1.121639898  |
| 2163 | C19H30N2O2    | 318.454 | Gibberellic acid                       | -1.085533275 | 1.036890387  |
| 2164 | C21H39O6P     | 418.505 | N-m-Tolylphthalamic acid               | 1.310745126  | -1.027140067 |
| 2166 | C21H39O5P     | 402.505 | o-Dichlorobenzene                      | -1.022088173 | -1.141659986 |
| 2167 | C20H39O5P     | 390.494 | p-Dichlorobenzene                      | 1.097673863  | -1.057296673 |
| 2171 | C22H41FNaO6P  | 474.519 | Naphthalene                            | -1.023888916 | -1.04883344  |
| 2170 | C20H39ClNaO6P | 464.937 | 3,4,4'-trichlorocarbanilide            | 9.783635058  | 2.019966309  |
| 2172 | C20H40NaO7P   | 446.491 | 1-Nitronaphthalene                     | 1.075415001  | -1.169901509 |
| 2173 | C12H26O3S     | 250.398 | Siduron                                | -1.23382839  | 1.098371305  |
| 1994 | C14H26N2O     | 238.369 | CH223191                               | 1.015982956  | 1.181260321  |
| 1995 | C13H17BrN2O   | 297.191 | JRS-Pr-15                              | -1.115596653 | 1.02602009   |
| 1996 | C19H19N5O     | 333.387 | JRS                                    | -1.013667524 | -1.121843142 |
| 1997 | C20H30N2O3    | 346.464 | SHH-04-022                             | -1.058130688 | 1.008343899  |
| 1998 | C18H28N2O3    | 320.427 | SHH-04-029                             | -1.193670236 | -1.050766412 |



|      |               |         |                |              |              |
|------|---------------|---------|----------------|--------------|--------------|
| 1999 | C17H14N2O4S   | 342.369 | SHH-04-021     | -1.277480146 | -1.087673046 |
| 2000 | C21H20N2O4S   | 396.459 | MTPC           | -1.12973183  | 1.055296429  |
| 2001 | C19H18N2O4S   | 370.422 | SHH-04-024     | -1.21032182  | -1.096686901 |
| 2002 | C6H7NO2S      | 157.19  | SHH-04-037     | -1.045983589 | -1.103734586 |
| 2003 | C17H16N2O3S   | 328.386 | SHH-04-032I    | 1.313029291  | -1.09667029  |
| 2004 | C24H27N3O3S   | 437.554 | SHH-04-032II   | 3.651481682  | -1.171379636 |
| 2005 | C28H32N4O3S   | 504.644 | SHH-04-042     | 1.980061038  | -1.122542459 |
| 2006 | C25H21F3N4O3S | 514.519 | SHH-04-036     | -1.119113427 | -1.140688622 |
| 2007 | C27H25F3N4O3S | 542.573 | Celecoxib      | -1.078878817 | -1.015926758 |
| 2008 | C27H23N3O4S   | 485.554 | SHN-01-023     | 1.268092859  | 1.177622367  |
| 2009 | C17H14F3N3O2S | 381.372 | SHN-01-025     | 1.004422893  | -1.074029897 |
| 2010 | C18H29N3O2    | 319.442 | PDJ-vii-49a    | -1.028371319 | 1.087501782  |
| 2011 | C15H18F3N3O3  | 345.317 | JRS-Pr-16      | 1.031963668  | 1.125673509  |
| 2012 | C17H20F3N3O5  | 403.353 | HSH-2          | -1.158236965 | -1.239090194 |
| 2013 | C23H37N3O3    | 403.558 | HSH-8          | -1.100847294 | -1.125311742 |
| 2014 | C17H28N2O2    | 292.416 | SHH-04-051     | 2.899704106  | 1.037299585  |
| 2015 | C17H28N2O2    | 292.416 | SHH-04-055     | 1.004871286  | -1.031547761 |
| 2016 | C26H36N2O4    | 440.575 | HSH-03-074     | -1.21770624  | -1.011053912 |
| 2017 | C24H32N2O4    | 412.522 | HSH-37A        | 1.000863146  | -1.23818224  |
| 2018 | C24H31N3O2    | 393.522 | HSH-37B        | 1.451792233  | 1.0570052    |
| 2019 | C21H21F3N2O5  | 438.397 | HSH-37D        | -1.20810393  | -1.064506173 |
| 2020 | C21H21F3N2O5  | 438.397 | HSH-34         | 1.104575005  | -1.041417671 |
| 2021 | C21H22N2O6    | 398.409 | SHH-04-053-top | -1.153414668 | 1.049343959  |
| 2022 | C23H32FN3O    | 385.518 | SHH-04-053mid  | -1.181523549 | 1.041145629  |
| 2023 | C17H16N2O3S   | 328.386 | KR-II-3-21     | 1.713694095  | 1.067101434  |
| 2024 | C16H14N2O     | 250.295 | KR-II-4-21     | 1.128672224  | 1.048901435  |
| 2025 | C21H40N2O3    | 368.554 | KR-I-188-23    | 4.180372213  | -1.075548908 |
| 2026 | C19H36N2O2S   | 356.566 | KR-II-5-21     | 1.300770425  | 1.034347965  |
| 2027 | C19H35NO4     | 341.486 | KR-II-2-20     | 1.042007666  | -1.036670023 |
| 2028 | C22H36O3      | 348.519 | KR-I-197-22    | -1.004102798 | 1.152124529  |
| 2029 | C20H38N2O3    | 354.527 | KR-I-185-20    | 1.007665922  | 1.055728619  |
| 2030 | C19H35NO4     | 341.486 | JRS-Pr-17      | -1.13648935  | 1.18357448   |
| 2031 | C20H37NO3     | 339.513 | TCC-8          | -1.10854513  | -1.398352556 |
| 2032 | C19H28N2O2    | 316.438 | Gabor tygrii   | 1.199556512  | -1.2878351   |
| 2033 | C14H9Cl2F3N2O | 349.135 | HHZ-D001       | 1.076189114  | -1.017758514 |
| 2034 | C21H39O6P     | 418.505 | HHZ-D004       | 2.908377245  | 1.100473933  |
| 2035 | C20H26F3N3O4  | 429.433 | JRS-PR-18      | -1.162970482 | 1.099261143  |
| 2036 | C17H22F3N3O4  | 389.369 | gabor Tygrii   | -1.096671731 | 1.085372271  |
| 2037 | C19H30N2O2    | 318.454 | Gabor Tygrii   | -1.218449618 | 1.099970744  |
| 2038 | C21H39O6P     | 418.505 | gabor Tygrii   | -1.114223645 | 1.11862817   |
| 2039 | C19H37O6P     | 392.467 | gabor Tygrii   | -1.08556835  | 1.045144247  |
| 2040 | C21H39O5P     | 402.505 | Gabor Tygrii   | 4.2870171    | -1.182408265 |
| 2041 | C20H39O5P     | 390.494 | JGW-9          | 2.659687275  | 1.147596357  |
| 2042 | C22H41O5P     | 416.532 | JGW-18         | -1.199872499 | -1.004021526 |
| 2043 | C22H42NaO6P   | 456.529 | xy-17          | -1.242756381 | -1.597154014 |

|      |               |         |                                             |              |              |
|------|---------------|---------|---------------------------------------------|--------------|--------------|
| 2044 | C20H39ClNaO6P | 464.937 | JG-34 (SS)                                  | -1.040655432 | 1.040018789  |
| 2045 | C22H41FNaO6P  | 474.519 | aLDRICH                                     | -1.009272334 | 1.006672238  |
| 2046 | C20H40NaO7P   | 446.491 | JGW-8                                       | -1.285479543 | 1.008635182  |
| 2047 | C12H26O3S     | 250.398 | JG-35(SR)                                   | 1.003215159  | 1.054918443  |
| 2048 | C20H39BrNaO6P | 509.388 | Triclosan                                   | -1.181156988 | -1.249839723 |
| 2049 | C20H40NaO7P   | 446.491 | HHZ-D005                                    | -1.004452601 | -1.376868055 |
| 2050 | C12H7Cl3O2    | 289.542 | HHZ-D006                                    | 1.122913693  | 1.148292053  |
| 2051 | C24H35N3O3    | 413.553 | SHH-04-058                                  | 1.274644136  | 1.06150066   |
| 2052 | C30H31N3O3    | 481.585 | SHH-04-062                                  | -1.052406072 | -1.069566216 |
| 2053 | C26H31N3O2    | 417.543 | SHH-04-066NH2                               | -1.043516837 | 1.078361075  |
| 2054 | C16H13N3O4S   | 343.357 | SHH-04-066-Me                               | -1.173494789 | 1.159106326  |
| 2055 | C16H14N4O3S   | 342.372 | JRS-PR-19                                   | -1.209827168 | -1.113724255 |
| 2056 | C17H15N3O3S   | 341.384 | JRS-PR-20                                   | -1.152252868 | 1.018300746  |
| 1996 | C19H19N5O     | 333.387 |                                             | -1.066424571 | 1.157903265  |
| 1997 | C20H30N2O3    | 346.464 |                                             | 1.335059779  | -1.033978117 |
| 1998 | C18H28N2O3    | 320.427 |                                             | -1.03918649  | 1.073575546  |
| 1999 | C17H14N2O4S   | 342.369 |                                             | 2.517203622  | -1.104024813 |
| 2000 | C21H20N2O4S   | 396.459 |                                             | 1.394597002  | -1.065122573 |
| 2174 | C20H39BrNaO6P | 509.388 | Irgasan                                     | 6.997283045  | 1.121476064  |
| 2175 | C20H40NaO7P   | 446.491 | Finasteride                                 | 1.031228024  | -1.063369661 |
| 2176 | C12H7Cl3O2    | 289.542 | Clomipramine                                | 1.285395133  | 1.059819445  |
| 2177 | C24H35N3O3    | 413.553 | Anthracene                                  | 1.296574673  | -1.040116963 |
| 2178 | C30H31N3O3    | 481.585 | BEHP                                        | 1.506368365  | -1.12328208  |
| 2179 | C26H31N3O2    | 417.543 | BHA                                         | 1.254214231  | 1.050276896  |
| 2180 | C16H13N3O4S   | 343.357 | BHT                                         | 1.190503864  | 1.040258175  |
| 2181 | C16H14N4O3S   | 342.372 | Bisphenol A                                 | 1.1387244    | -1.137260702 |
| 2183 | C16H24N2O     | 260.375 | Triton X-100                                | 1.766025899  | 1.646465561  |
| 2184 | C22H38N2O     | 346.55  | SDS                                         | 1.120598942  | -1.162476375 |
| 2185 | C14H10        | 178.229 | Phenanthrene                                | 1.147406495  | 1.378554969  |
| 2186 | C24H46O10     | 494.616 | Tween - 20                                  | 1.484575733  | 1.229511321  |
| 2187 | C12H27O4P     | 266.314 | n-dodecyl phosphoric acid                   | 1.800700515  | 1.046496     |
| 2188 | C10H11ClO3    | 214.646 | Clofibric acid                              | 1.016236925  | -1.114658102 |
| 2190 | C12H6Br4O     | 485.791 | PBDE-47                                     | 1.137221398  | 1.085270468  |
| 2191 | C6H14NO5P     | 211.153 | Pyrovatex CP                                | -1.161095757 | 1.057920737  |
| 2192 | C9H15Cl6O4P   | 430.905 | Amgard CJ                                   | 1.103082907  | 1.338121331  |
| 2193 | C18H15O4P     | 326.283 | Phosphoric acid triphenyl ester             | -1.059900136 | 1.162532904  |
| 2194 | C15H12N2O     | 236.269 | Carbamazepine                               | -1.011240437 | -1.070590735 |
| 2195 | C17H19ClF3NO  | 345.787 | Fluoxetine HCl                              | 1.145310693  | 1.051091129  |
| 2196 | C8H12Br4      | 427.797 | 1,2-dibromo-4-(1,2-dibromoethyl)cyclohexane | 1.161598472  | 1.125830085  |
| 2197 | C13H16N2S2    | 264.41  | N-cyclohexyl-2-benzothiazyl sulfenamide     | -1.08013246  | 1.116835414  |
| 2198 | C13H8ClNS     | 245.727 | 2-(4-chlorophenyl)-benzothiazole            | 1.603840235  | 1.141127279  |
| 2199 | C7H5NOS       | 151.186 | 2-hydroxy-benzothiazole                     | 1.061315234  | -1.029525469 |

|      |               |         |                                                        |              |              |
|------|---------------|---------|--------------------------------------------------------|--------------|--------------|
| 2200 | C26H28N2O2    | 400.513 | JRS-Pr-21                                              | -1.01849127  | -1.018235078 |
| 2201 | C26H30N2O2    | 402.529 | JRS-Pr-22                                              | 1.011364667  | 1.694111436  |
| 2202 | C26H34N2O4    | 438.559 | SHH04080                                               | 1.127512232  | 1.160500233  |
| 2203 | C5H7NS        | 113.181 | 4,5-dimethylthiazole                                   | -1.090010467 | 1.079244157  |
| 2204 | C12H14CINS    | 239.764 | SHH04067                                               | -1.002493184 | -1.076292293 |
| 2205 | C27H46O2      | 402.653 | CHOLESTAN-5?, 6?-<br>EPOXY-3?-OL                       | 1.30244855   | 1.061625074  |
| 2206 | C21H32O3      | 332.477 | PREGNAN-5a, 6a-EPOXY-<br>3?-OL-20-ONE                  | 1.448784669  | -1.076740558 |
| 2207 | C21H30O4      | 346.461 | 5a-PREGNAN-16, 17-<br>EPOXY-3?-OL-11, 20-<br>DIONE     | 1.410620203  | -1.101987114 |
| 2208 | C21H32O3      | 332.477 | 5a-PREGNAN-16, 17-<br>EPOXY-3?-OL-20-ONE               | -1.084544433 | -1.022935595 |
| 2209 | C27H46O2      | 402.653 | CHOLESTAN-5a, 6a-<br>EPOXY-3?-OL                       | -1.094111145 | 1.05830178   |
| 2210 | C21H32O4      | 348.476 | 5?-PREGNAN-16, 17-<br>EPOXY-3a, 12a-DIOL-20-<br>ONE    | -1.179446606 | 1.093257945  |
| 2211 | C21H32O3      | 332.477 | 5?-PREGNAN-16, 17-<br>EPOXY-3?-OL-20-ONE               | 1.205463463  | 1.033963771  |
| 2212 | C22H32O3      | 344.488 | 5-PREGNEN-16, 17-<br>EPOXY-16?-METHYL-3?-<br>OL-20-ONE | -1.091998617 | 1.171694864  |
| 2213 | C11H9NOS      | 203.26  | Cri-14-16                                              | -1.067058393 | 1.052591212  |
| 2214 | C12H7F3OS     | 256.244 | HHZ                                                    | -1.20265312  | -1.116584229 |
| 2215 | C18H34N2O4    | 342.474 | AKR-I-46-24                                            | 1.062111396  | 1.04694024   |
| 2216 | C19H34N2O4    | 354.484 | AKR-I-27-28                                            | -1.205447202 | -1.039128204 |
| 2217 | C19H36N2O3    | 340.501 | KR-II-149-23                                           | -1.137163333 | 1.06949656   |
| 2218 | C19H36N2O3    | 340.501 | MRK-I-147-31                                           | -1.02054007  | 1.009909348  |
| 2219 | C19H36N2O3    | 340.501 | MRK-I-145-10                                           | -1.086672416 | -1.066015152 |
| 2220 | C20H35N3O2    | 349.511 | PN-II-91-35                                            | 1.042687389  | 1.161761131  |
| 2221 | C9H12N4O3     | 224.217 | SHH-04-089                                             | 1.154169891  | 1.026823307  |
| 2222 | C15H11NO5     | 285.252 | SHH-04-098                                             | -1.546764215 | -1.185983024 |
| 2223 | C28H40N2O4    | 468.628 | SHH-04-091                                             | -1.083516512 | 1.129857502  |
| 2224 | C30H44N2O6    | 528.68  | SHH-04-092                                             | 1.278675945  | -1.101964235 |
| 2225 | C16H13N3O4S   | 343.357 | AG-1-0                                                 | 1.244711313  | 1.163155816  |
| 2226 | C21H23N3O3S   | 397.491 | AG-1-10                                                | -1.211722565 | -1.01895849  |
| 2227 | C19H19N3O4S   | 385.437 | AG-1-13                                                | -1.010529088 | -1.099480545 |
| 2228 | C23H27N3O3S   | 425.544 | AG-1-14                                                | 1.335040343  | 1.007752229  |
| 2229 | C9H10Cl2N2O   | 233.095 | DIURON                                                 | 1.0256666    | -1.166240861 |
| 2230 | C14H20N2O     | 232.321 | SIDURON                                                | 1.114762296  | -1.023795779 |
| 2231 | C9H11ClN2O    | 198.649 | MONURON                                                | -1.014254112 | -1.459057022 |
| 2232 | C14H9ClF2N2O2 | 310.683 | DIMILIN                                                | 1.022916351  | -1.028577398 |

II. **Table S2:** Activity of *N*-phenyl-*N'*-(4-((2,6-difluorobenzyl)oxy)cyclohexyl) ureas **II**, in the ternary complex and cell proliferation assay.

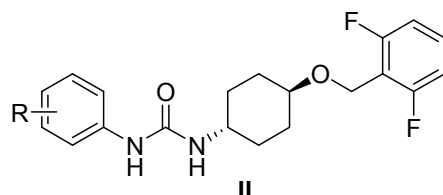

| Compound | R                         | <i>E</i> <sub>max</sub> (F/R) (μM) |      |      | IC <sub>50</sub><br>(μM) |
|----------|---------------------------|------------------------------------|------|------|--------------------------|
|          |                           | 30                                 | 15   | 7.5  |                          |
| II-1o    | <i>o</i> -F               | 0.89                               | 0.98 | 0.96 | >20                      |
| II-1m    | <i>m</i> -F               | 0.67                               | 0.77 | 0.72 | >20                      |
| II-2o    | <i>o</i> -Cl              | 0.81                               | 0.69 | 0.81 | >20                      |
| II-2m    | <i>m</i> -Cl              | 0.75                               | 0.78 | 0.79 | >20                      |
| II-2p    | <i>p</i> -Cl              | 0.74                               | 0.96 | 0.95 | >20                      |
| II-3o    | <i>o</i> -Br              | 0.96                               | 0.99 | 0.96 | >20                      |
| II-3m    | <i>m</i> -Br              | 0.98                               | 1.04 | 1.07 | >20                      |
| II-3p    | <i>p</i> -Br              | 0.73                               | 0.85 | 0.76 | >20                      |
| II-4o    | <i>o</i> -I               | 0.81                               | 0.74 | 0.81 | >20                      |
| II-4m    | <i>m</i> -I               | 0.72                               | 0.75 | 0.69 | >20                      |
| II-4p    | <i>p</i> -I               | 0.67                               | 0.82 | 0.76 | >20                      |
| II-5o    | <i>o</i> -CF <sub>3</sub> | 0.64                               | 0.80 | 0.95 | >20                      |

|               |                             |      |      |      |     |
|---------------|-----------------------------|------|------|------|-----|
| <b>II-5m</b>  | <i>m</i> -CF <sub>3</sub>   | 1.11 | 1.15 | 1.13 | >20 |
| <b>II-5p</b>  | <i>p</i> -CF <sub>3</sub>   | 0.85 | 0.79 | 0.91 | >20 |
| <b>II-6o</b>  | <i>o</i> -CF <sub>3</sub> O | 0.76 | 0.93 | 0.93 | >20 |
| <b>II-6p</b>  | <i>p</i> -CF <sub>3</sub> O | 0.98 | 0.80 | 0.81 | >20 |
| <b>II-7o</b>  | <i>o</i> -Me                | 0.83 | 0.79 | 0.78 | >20 |
| <b>II-7m</b>  | <i>m</i> -Me                | 0.81 | 0.89 | 0.82 | >20 |
| <b>II-7p</b>  | <i>p</i> -Me                | 0.77 | 0.81 | 0.81 | >20 |
| <b>II-8o</b>  | <i>o</i> -MeO               | 0.84 | 0.88 | 0.94 | >20 |
| <b>II-8m</b>  | <i>m</i> -MeO               | 0.74 | 0.97 | 0.84 | >20 |
| <b>II-8p</b>  | <i>p</i> -MeO               | 0.68 | 0.71 | 0.74 | >20 |
| <b>II-9o</b>  | <i>o</i> -NO <sub>2</sub>   | 0.74 | 0.90 | 0.96 | >20 |
| <b>II-9m</b>  | <i>m</i> -NO <sub>2</sub>   | 0.94 | 0.76 | 0.96 | >20 |
| <b>II-9p</b>  | <i>p</i> -NO <sub>2</sub>   | 0.83 | 0.83 | 0.87 | >20 |
| <b>II-10o</b> | <i>o</i> -MeS               | 0.83 | 0.90 | 0.82 | >20 |
| <b>II-10m</b> | <i>m</i> -MeS               | 1.06 | 0.73 | 1.01 | >20 |
| <b>II-10p</b> | <i>p</i> -MeS               | 1.07 | 0.98 | 0.94 | >20 |
| <b>II-11</b>  | H                           | 0.81 | 0.88 | 0.89 | >20 |

III. **Figure S1:** Time response studies of the selected *N*-aryl,*N'*-cyclohexylarylureas in the surrogate eIF2 $\alpha$  phosphorylation assays.

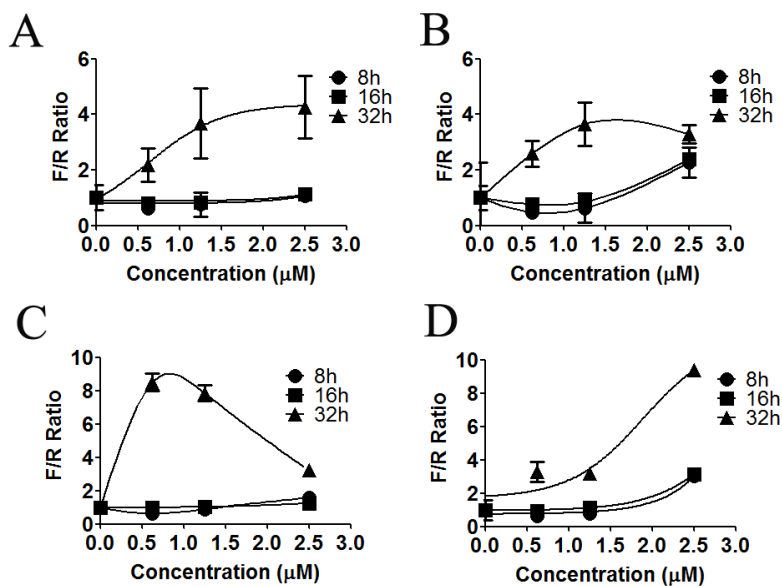

**Figure S1. Time response studies of the selected *N*-aryl,*N'*-cyclohexylarylureas in the surrogate eIF2 $\alpha$  phosphorylation assays.** Reporter cells were incubated with (A) I-14, (B) I-15, (C) III-3 and (D) III-4 for 8, 16, or 32 hours and the F/R was determined by DLR assay. The experiment was conducted in triplicate and each experiment was independently performed three times; Data are shown as Mean $\pm$ S.E.M.

IV.  $^1\text{H}$ -NMR,  $^{13}\text{C}$ -NMR and  $^{19}\text{F}$ -NMR (if any) spectra for compounds **1-10**.

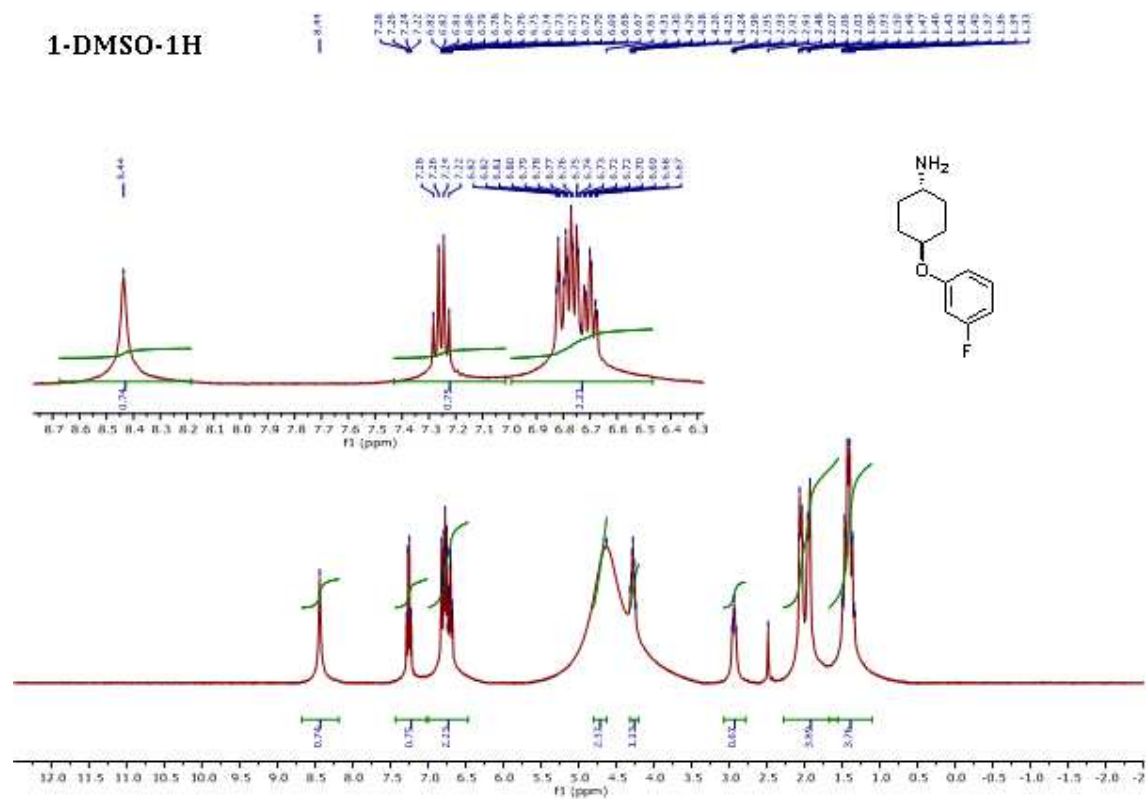

1-DMSO-13C

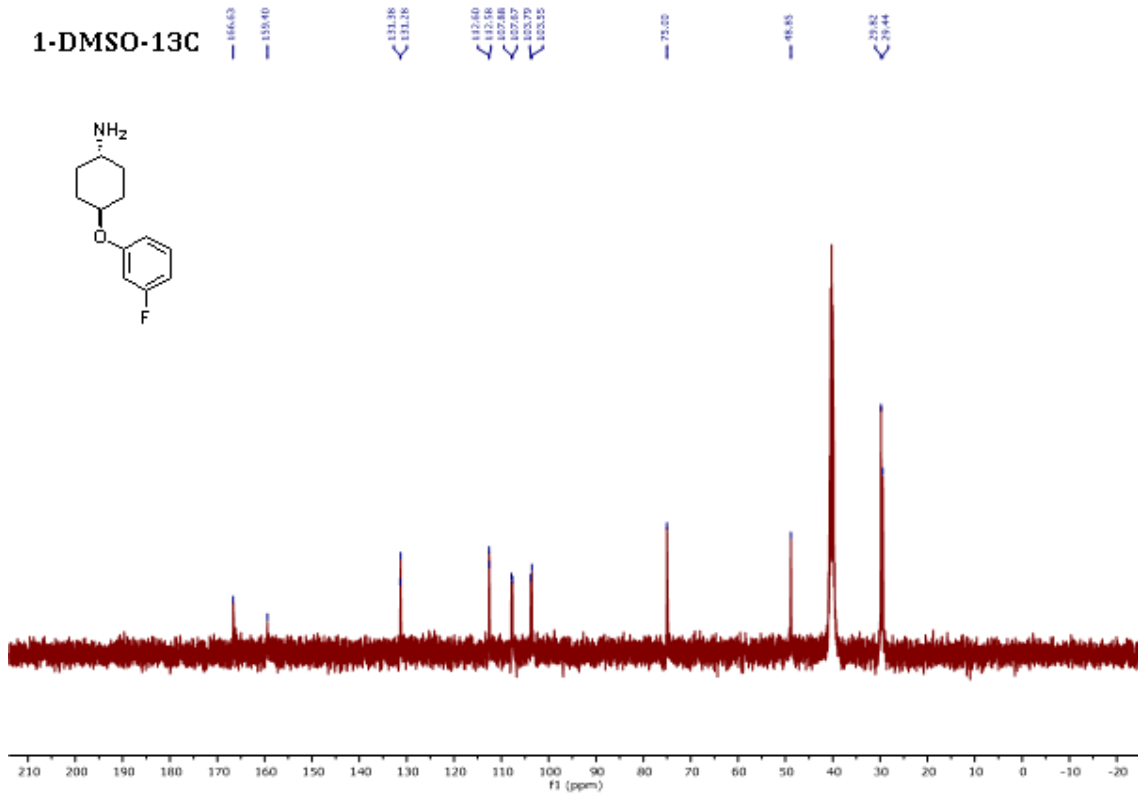

1-DMSO-19F

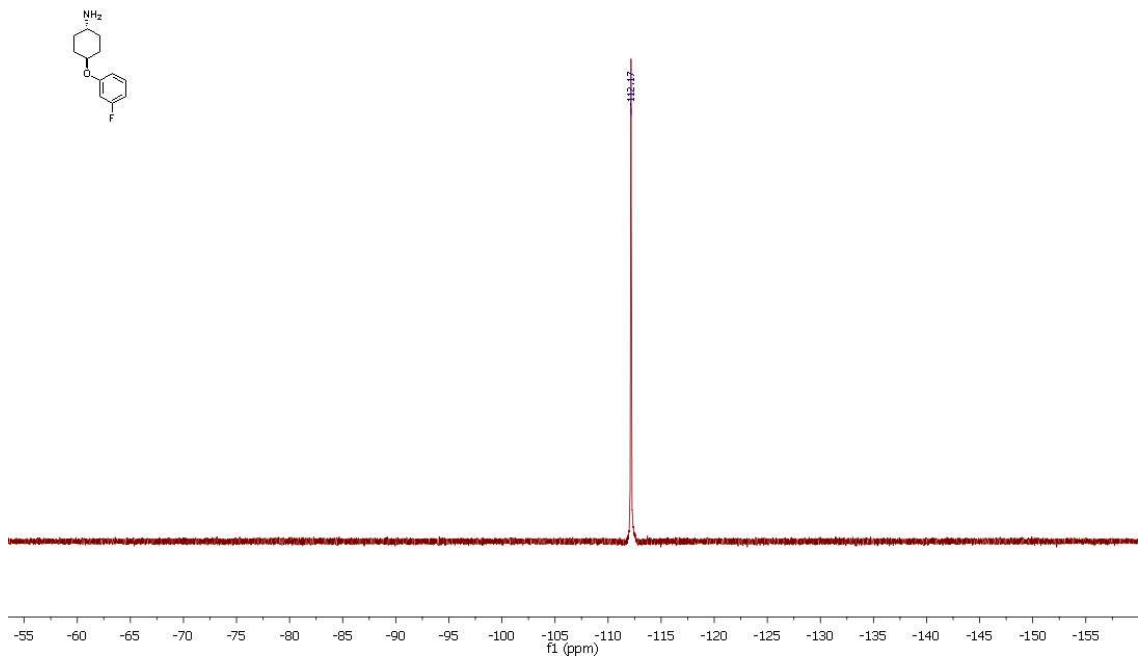



2-DMSO-1H

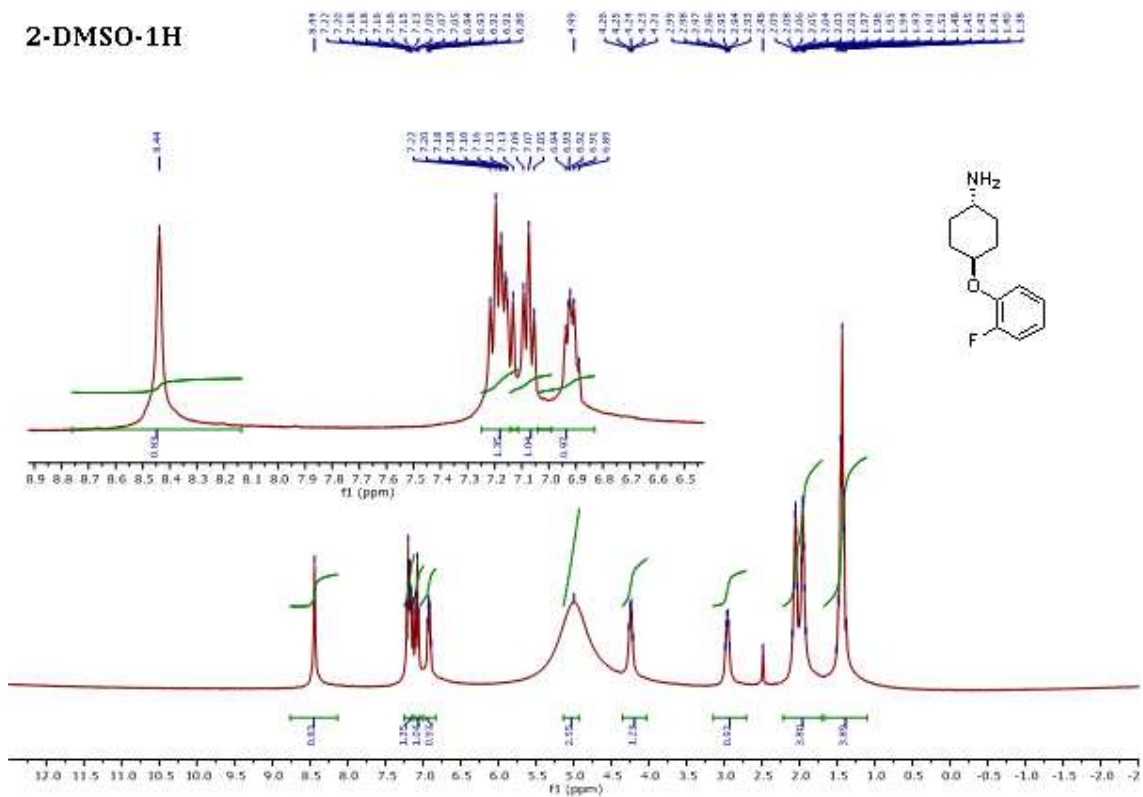

2-DMSO-13C

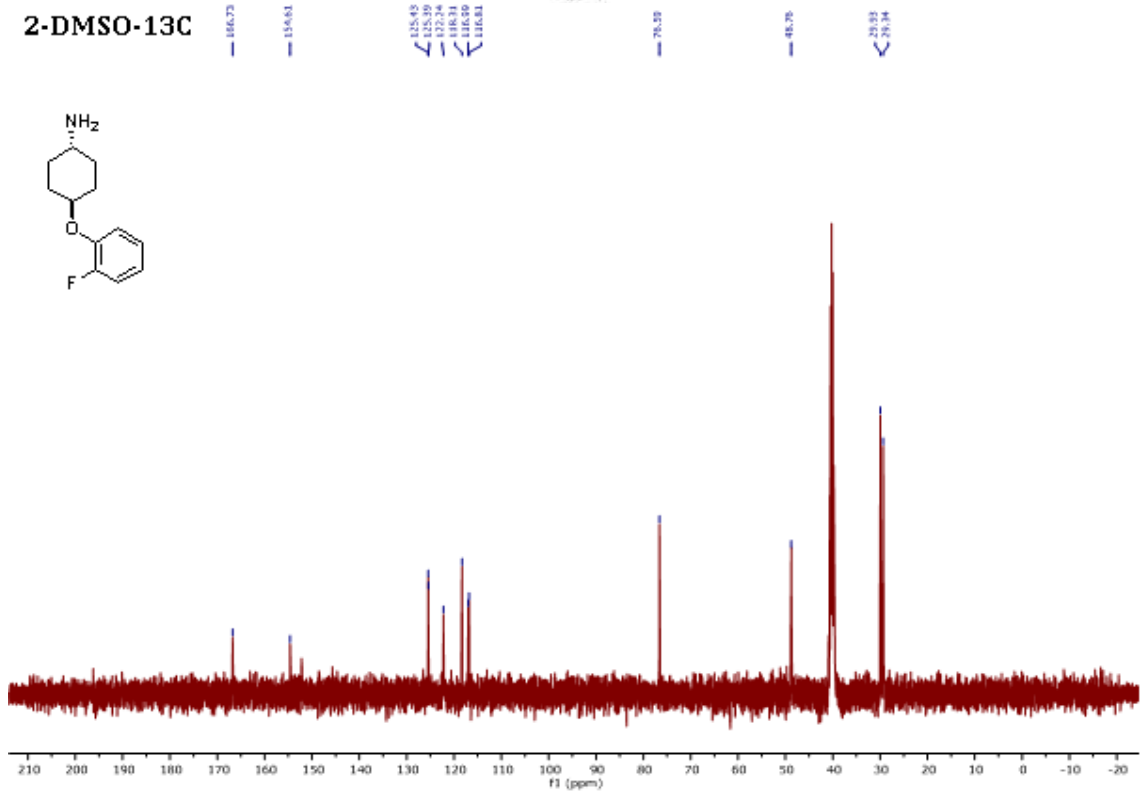

2-DMSO-19F

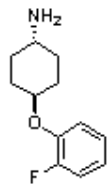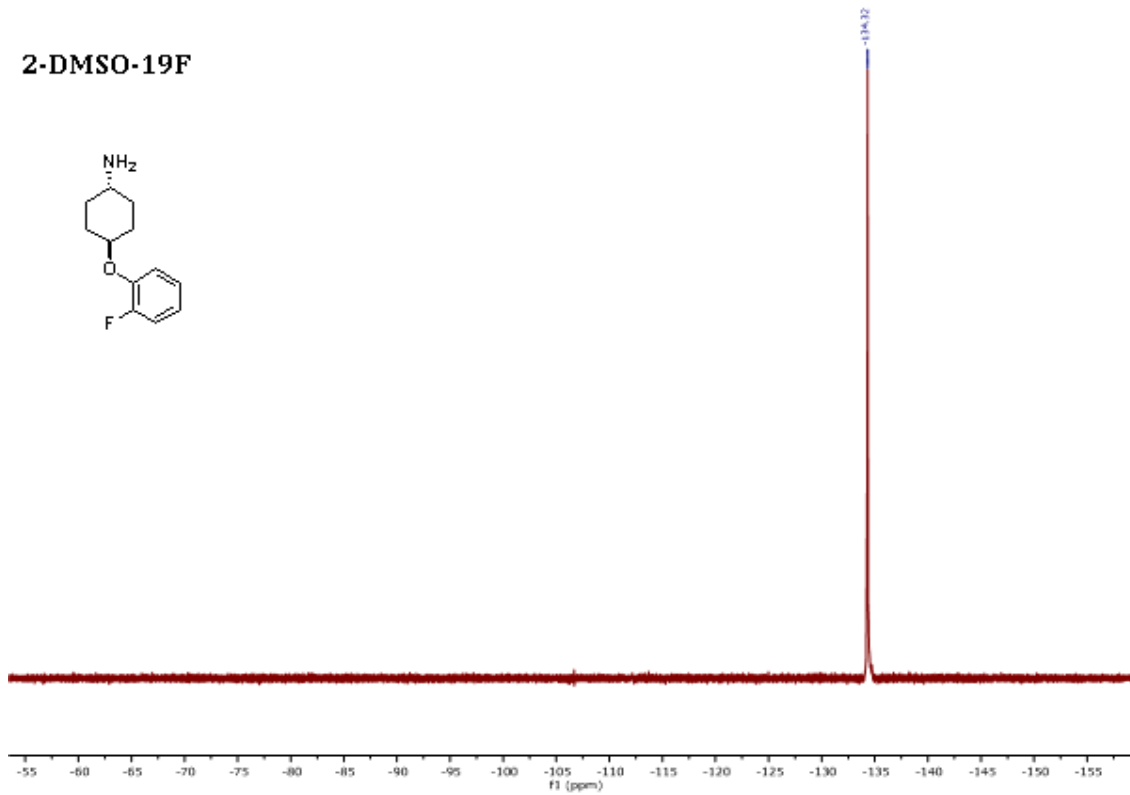

3-DMSO-1H

8.40, 7.28, 7.28, 7.26, 7.26, 6.96, 6.96, 6.93, 6.93, 4.26, 4.24, 4.23, 4.21, 4.20, 3.83, 2.95, 2.95, 2.93, 2.92, 2.91, 2.89, 2.88, 2.87, 2.05, 2.02, 1.96, 1.94, 1.92, 1.92, 1.46, 1.39, 1.38, 1.36

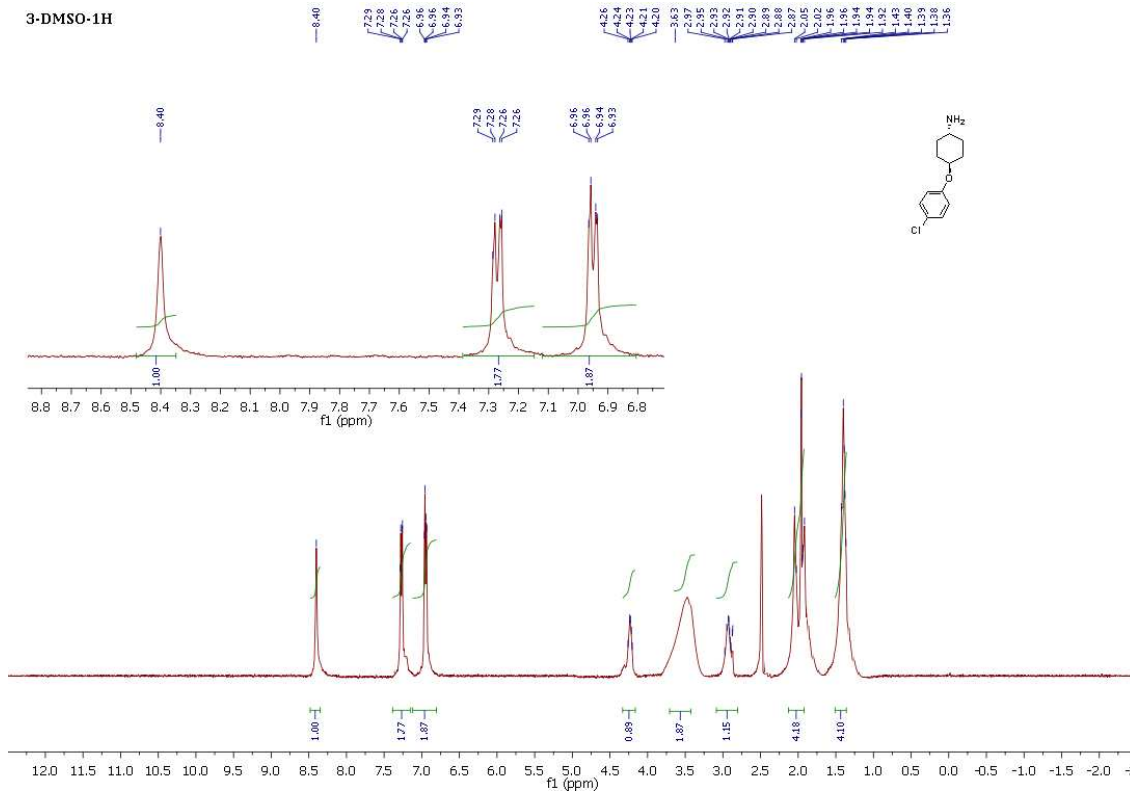

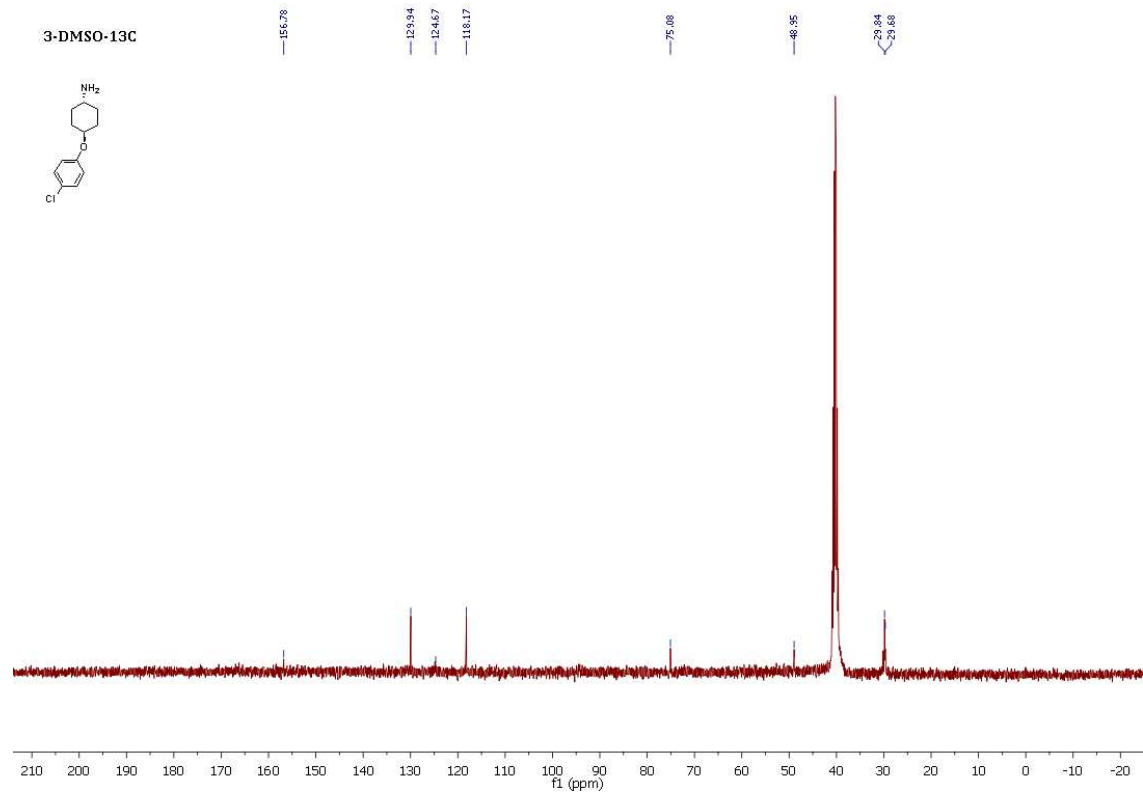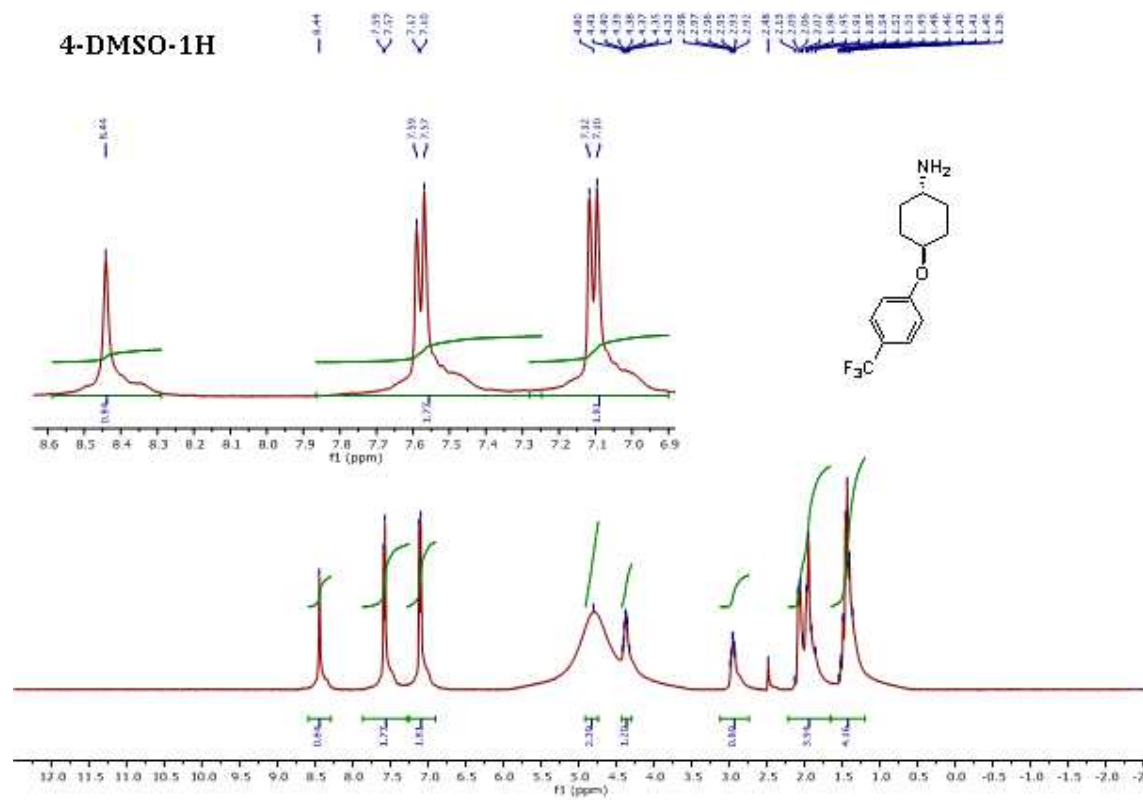

4-DMSO-13C

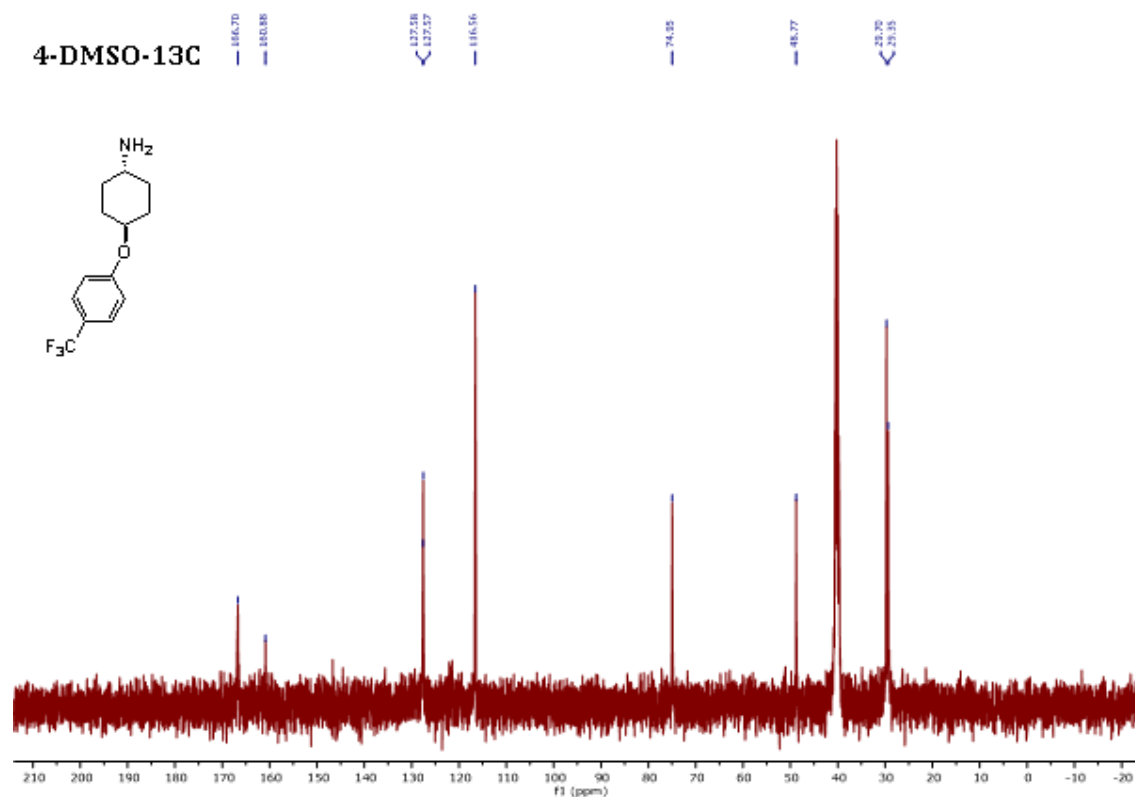

4-DMSO-19F

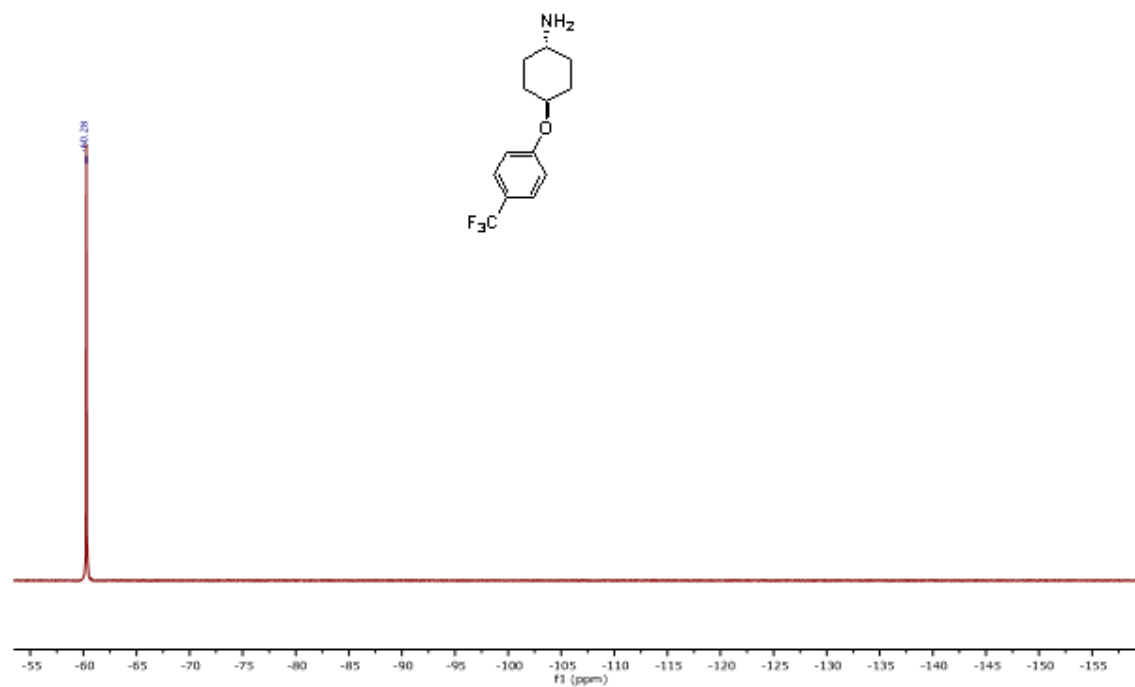

5-DMSO-1H

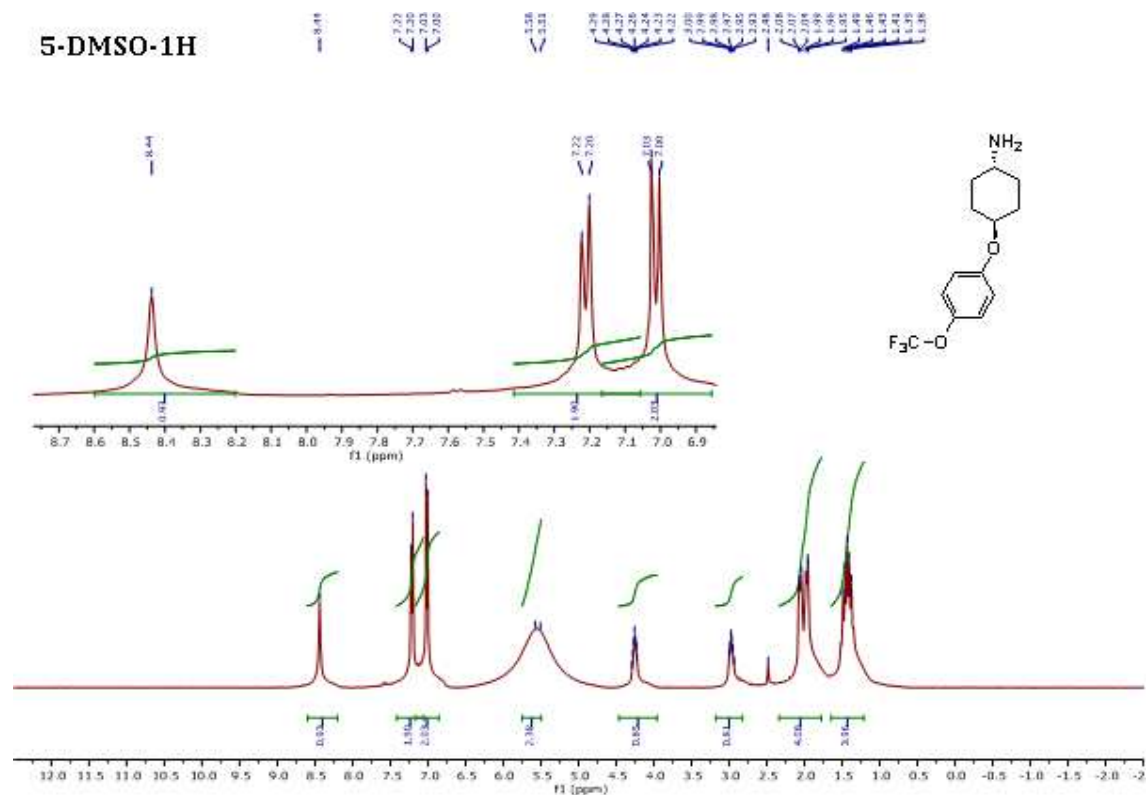

5-DMSO-13C

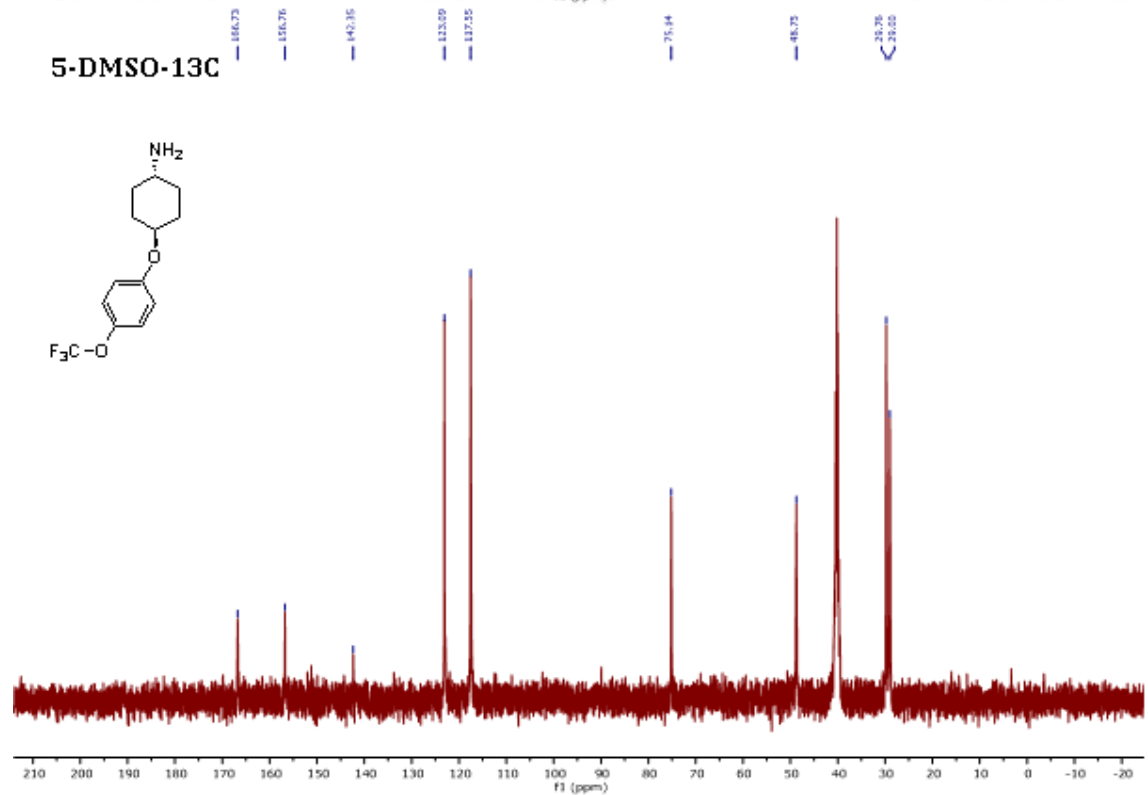

5-DMSO-19F

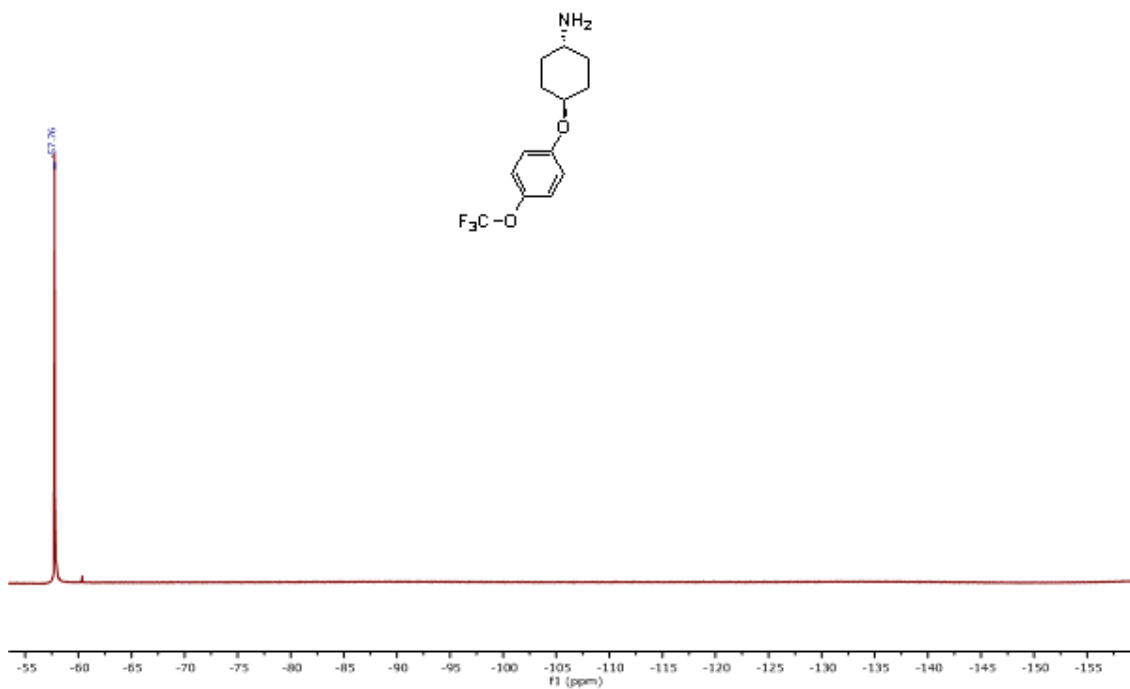

6-DMSO-1H

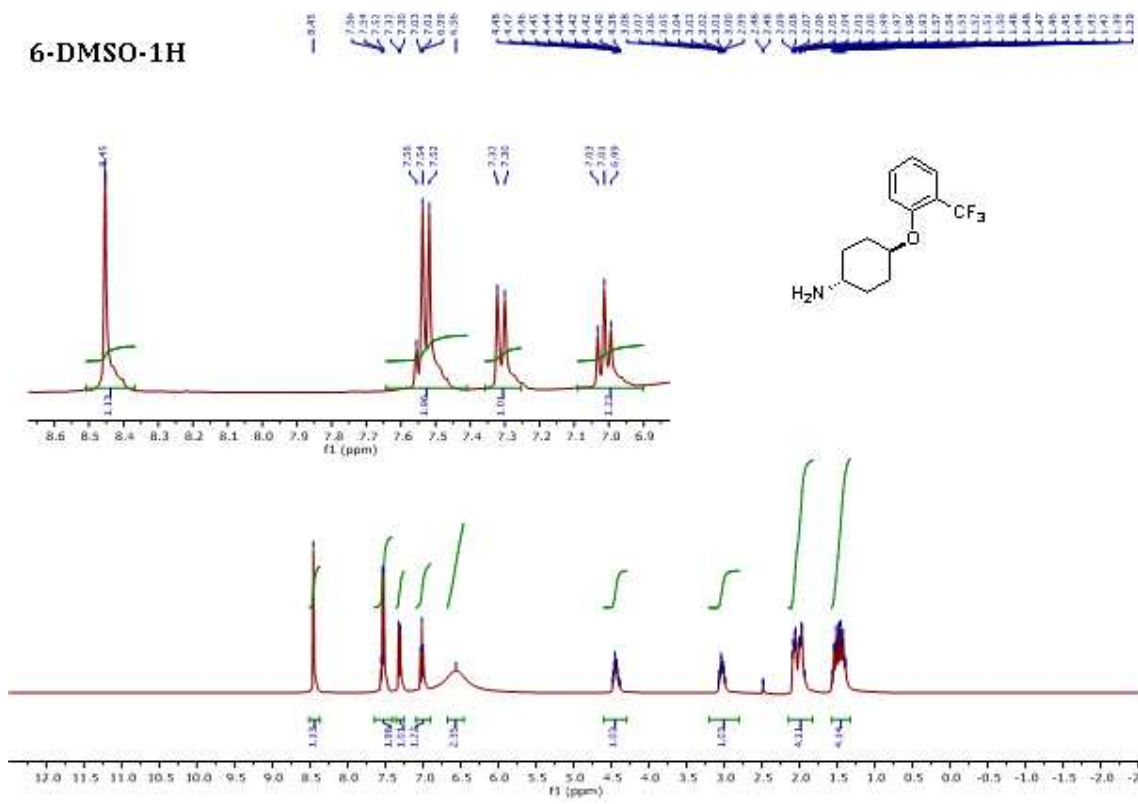

6-DMSO-13C

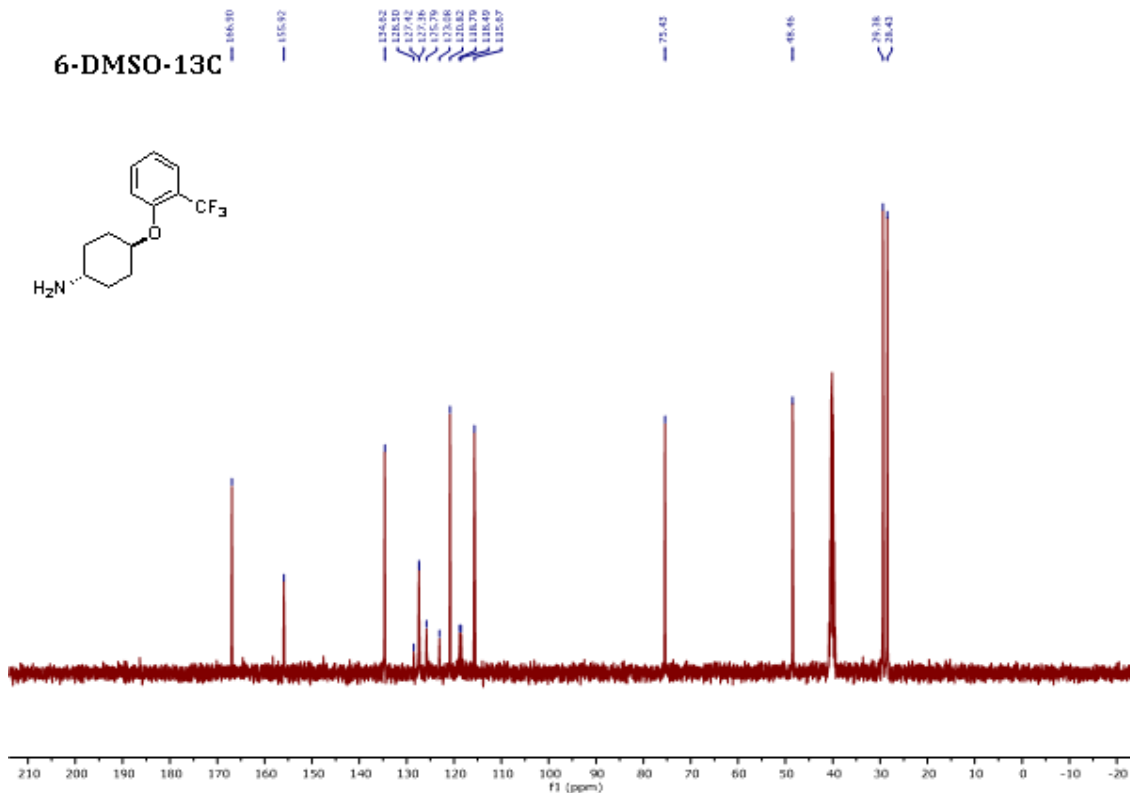

6-DMSO-19F

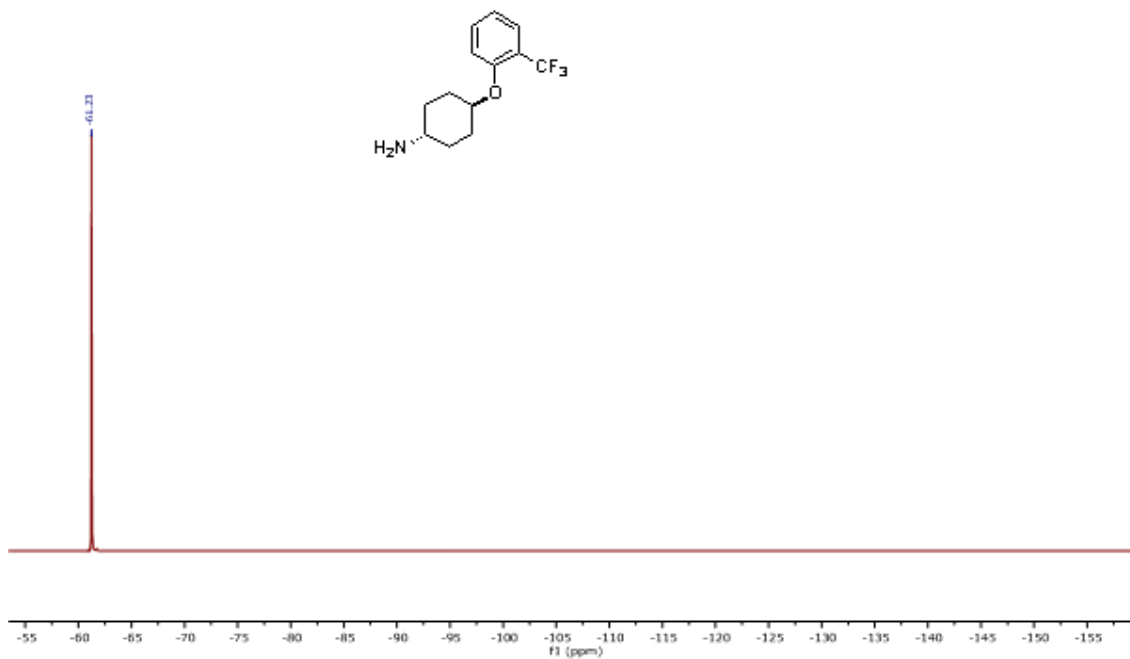

7-DMSO-1H

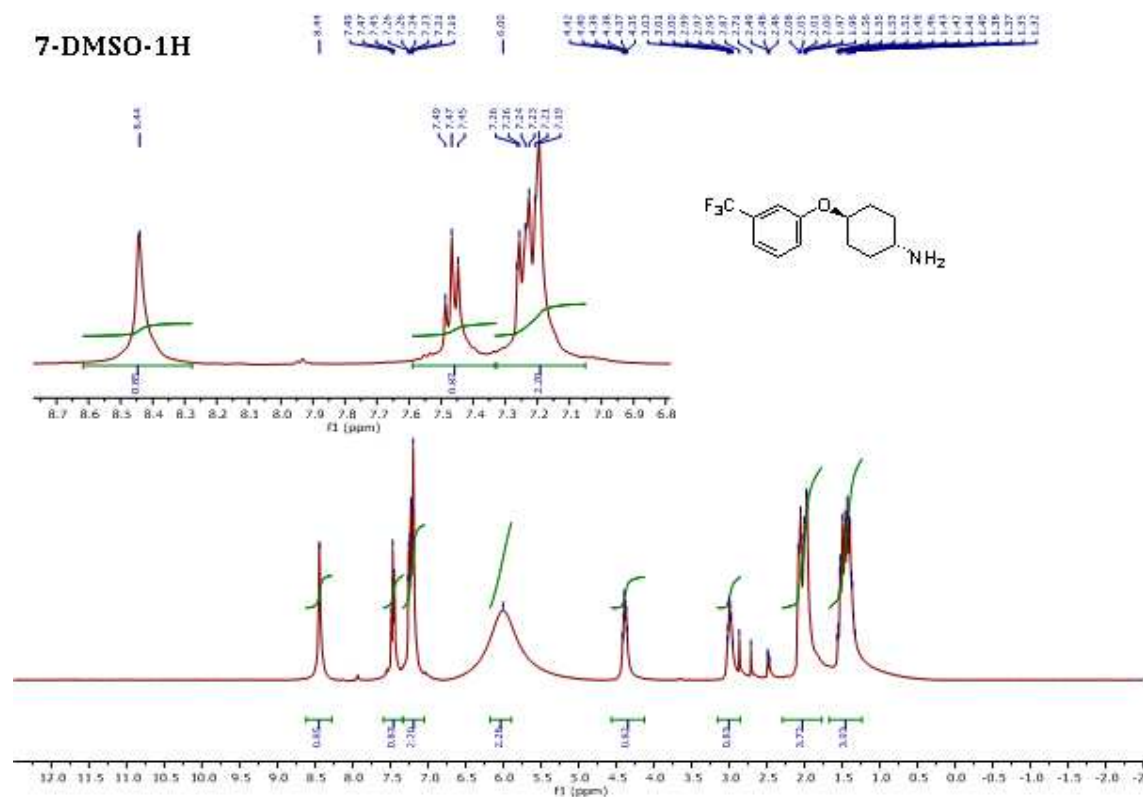

7-DMSO-13C

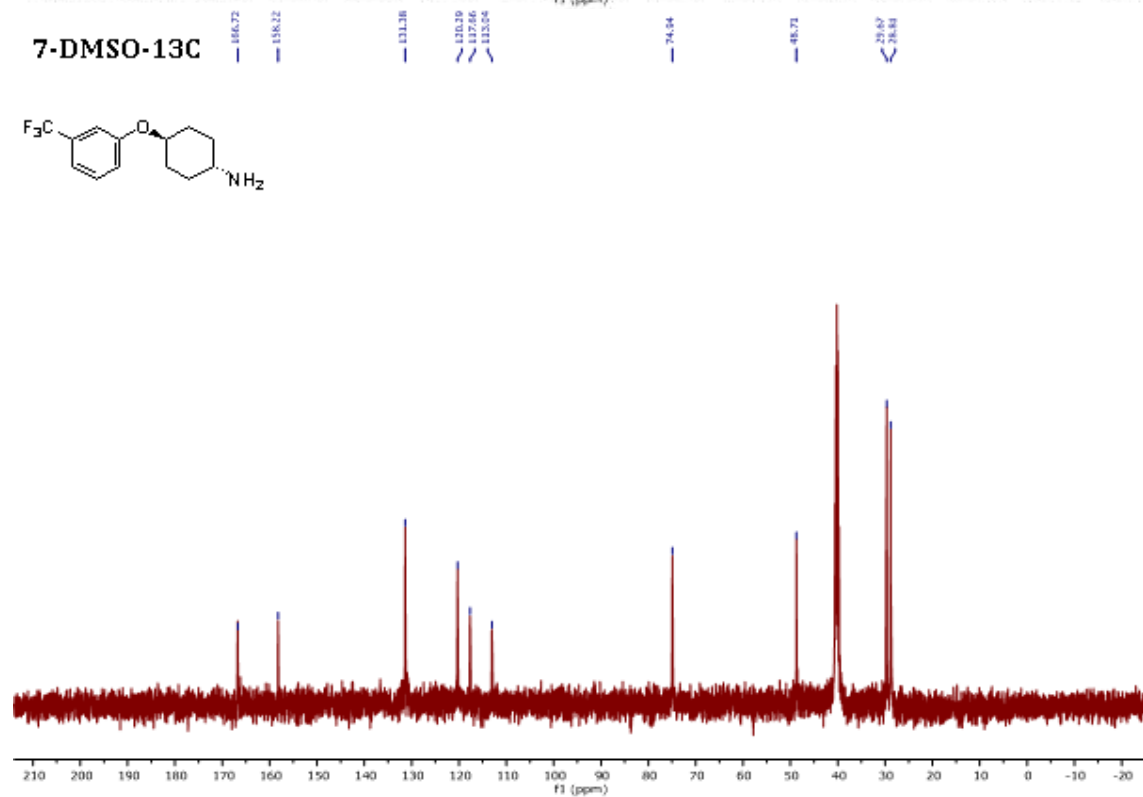



7-DMSO-19F

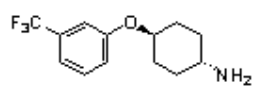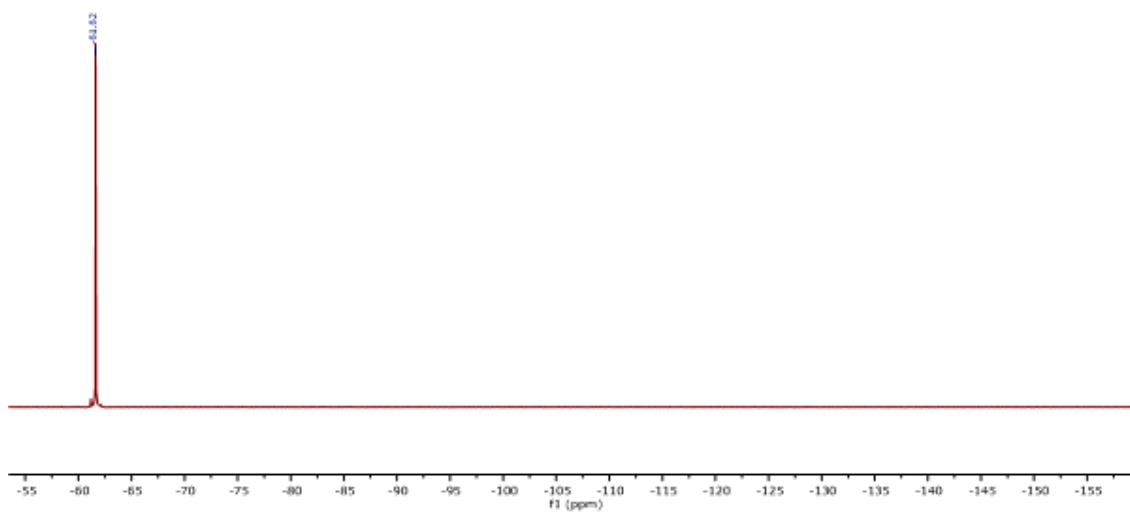

8-DMSO-1H

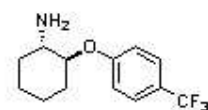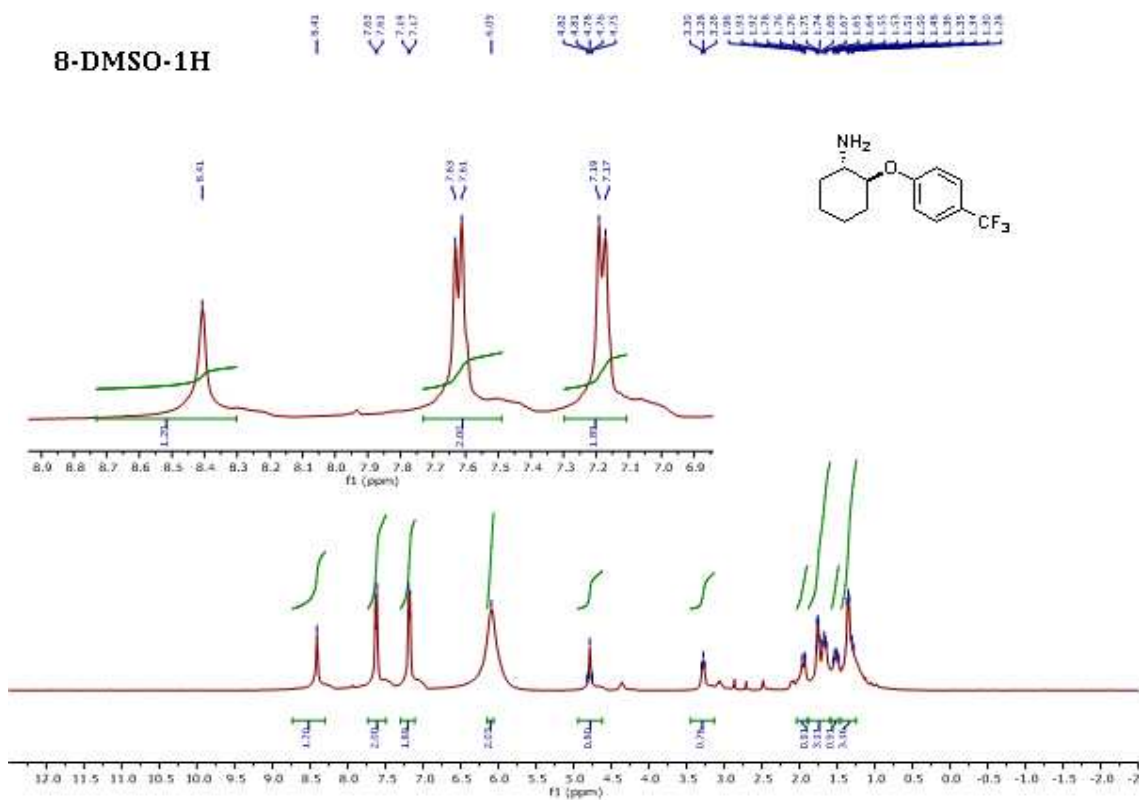

8-DMSO-13C

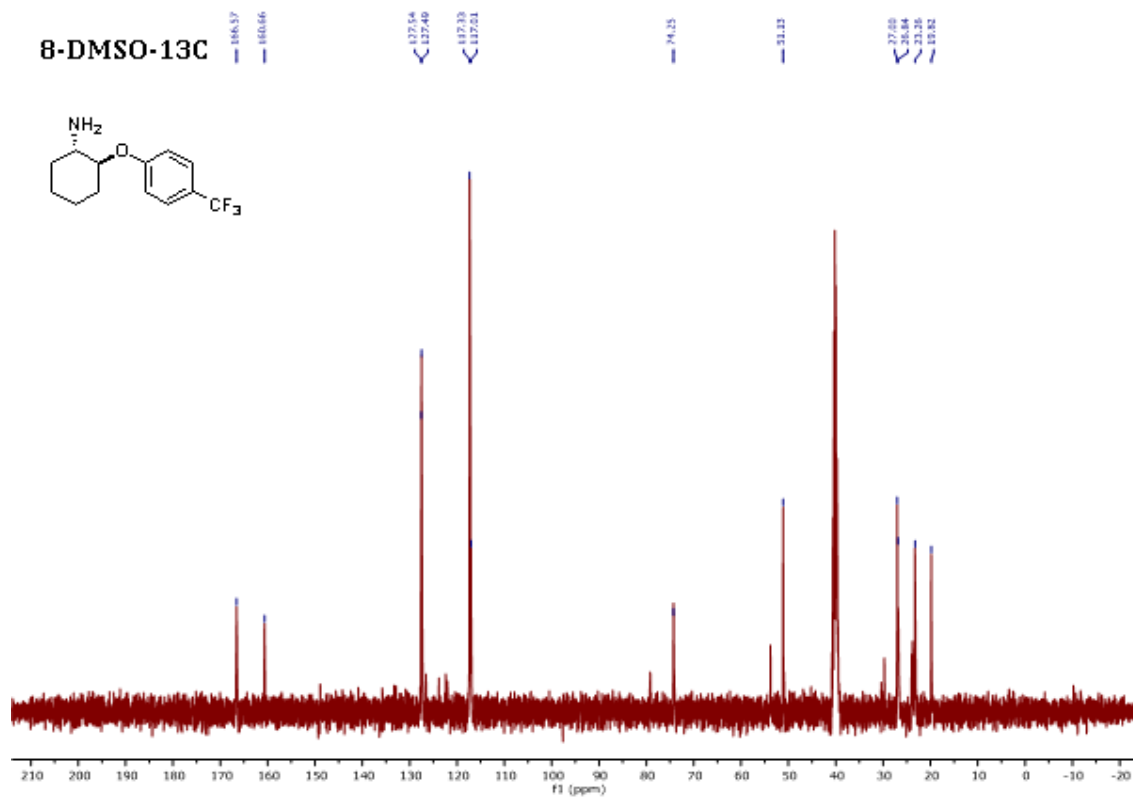

8-DMSO-19F

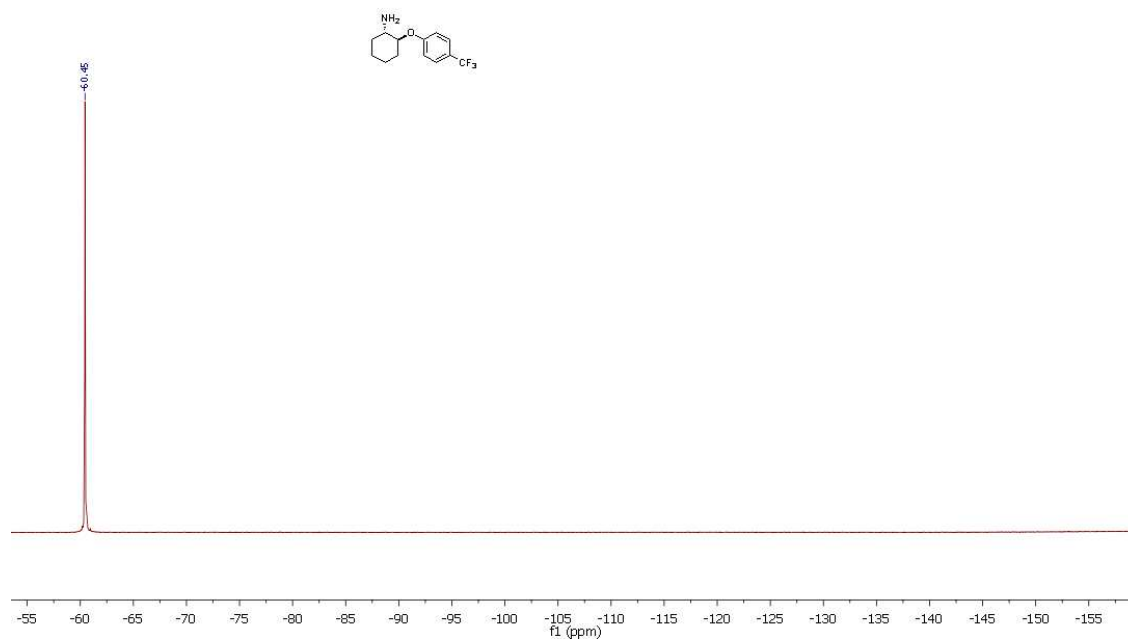

9-DMSO-1H

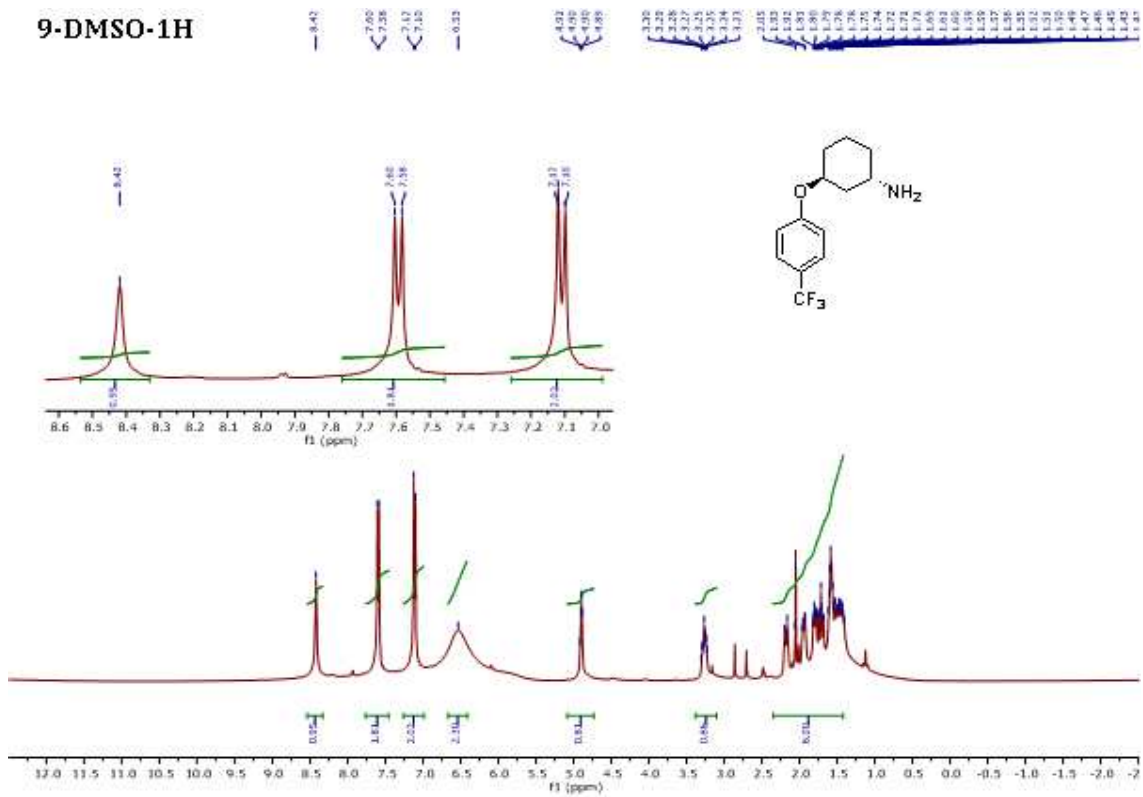

9-DMSO-13C

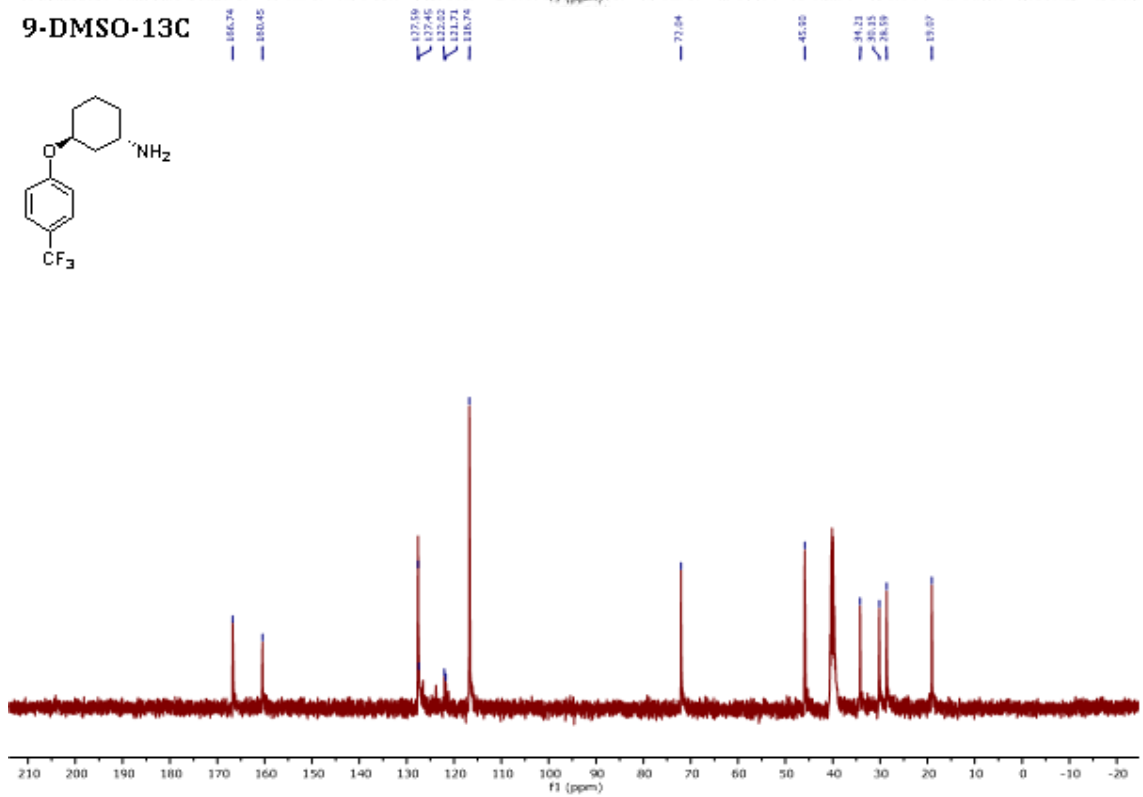

9-DMSO-19F

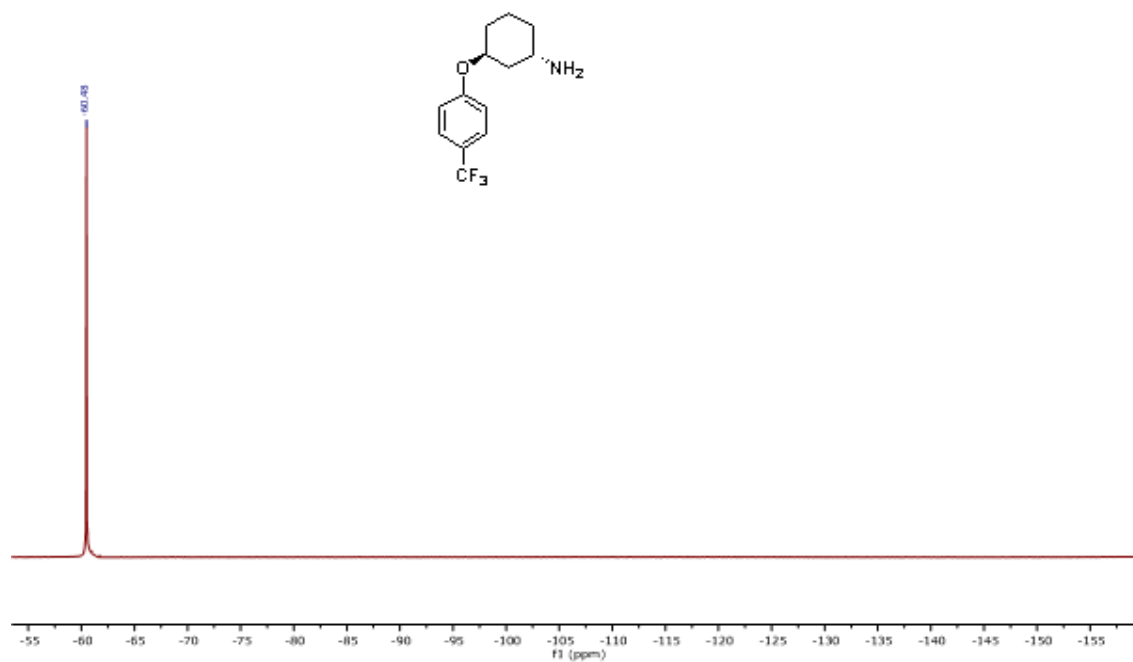

10-DMSO-1H

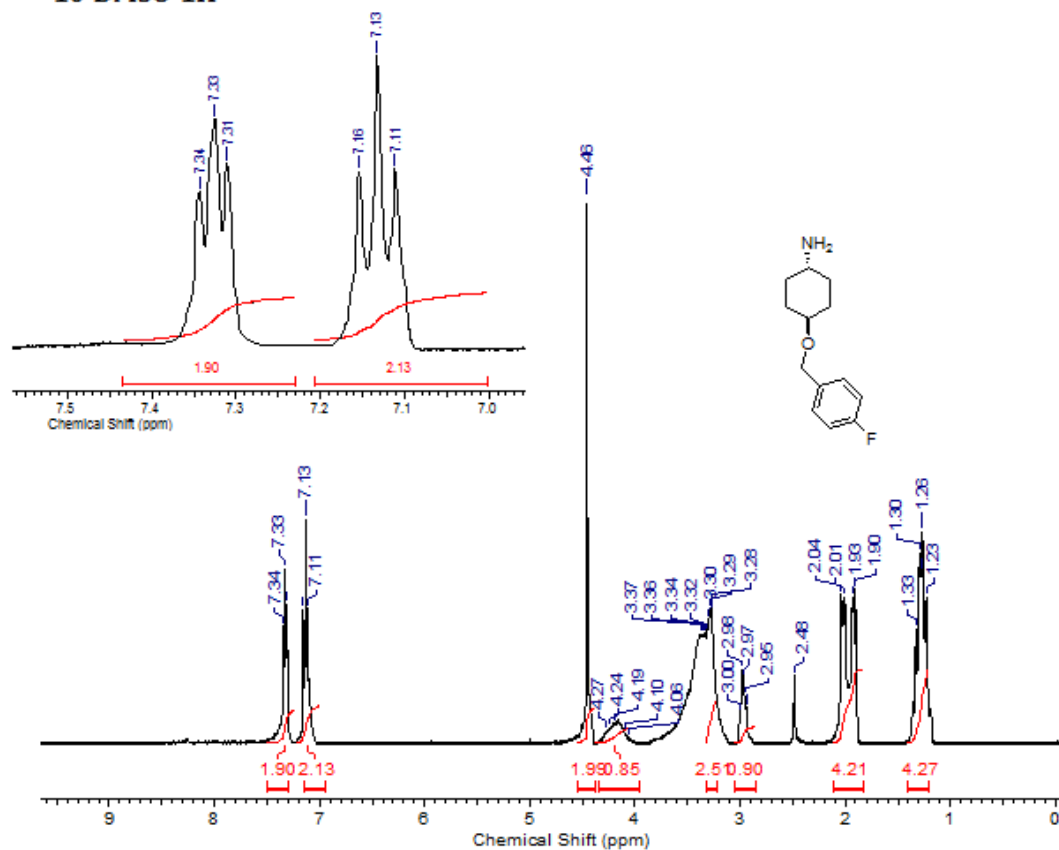

10-DMSO-19F

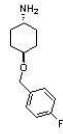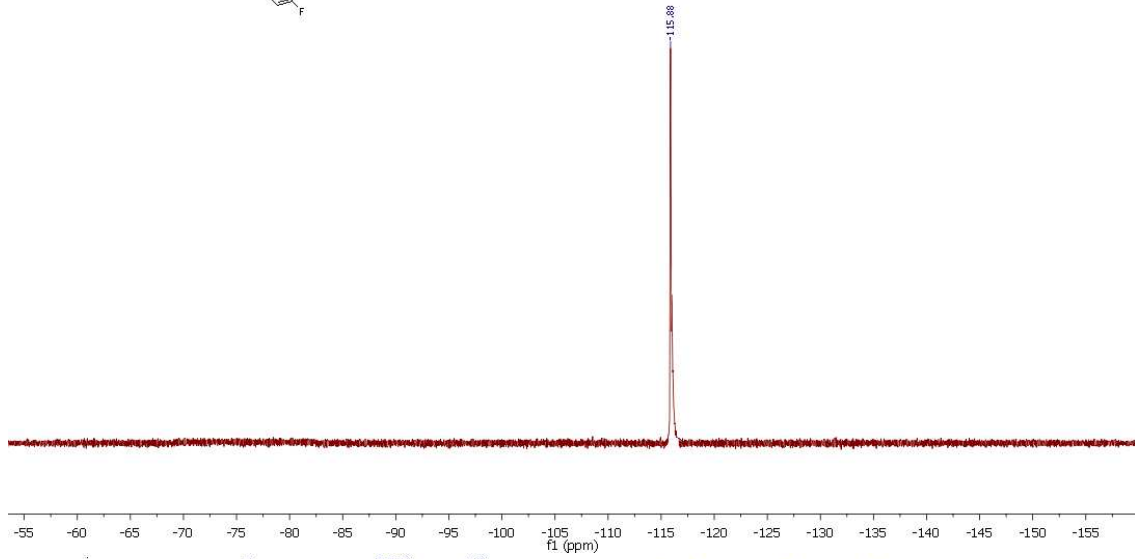

10-DMSO-13C

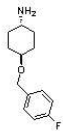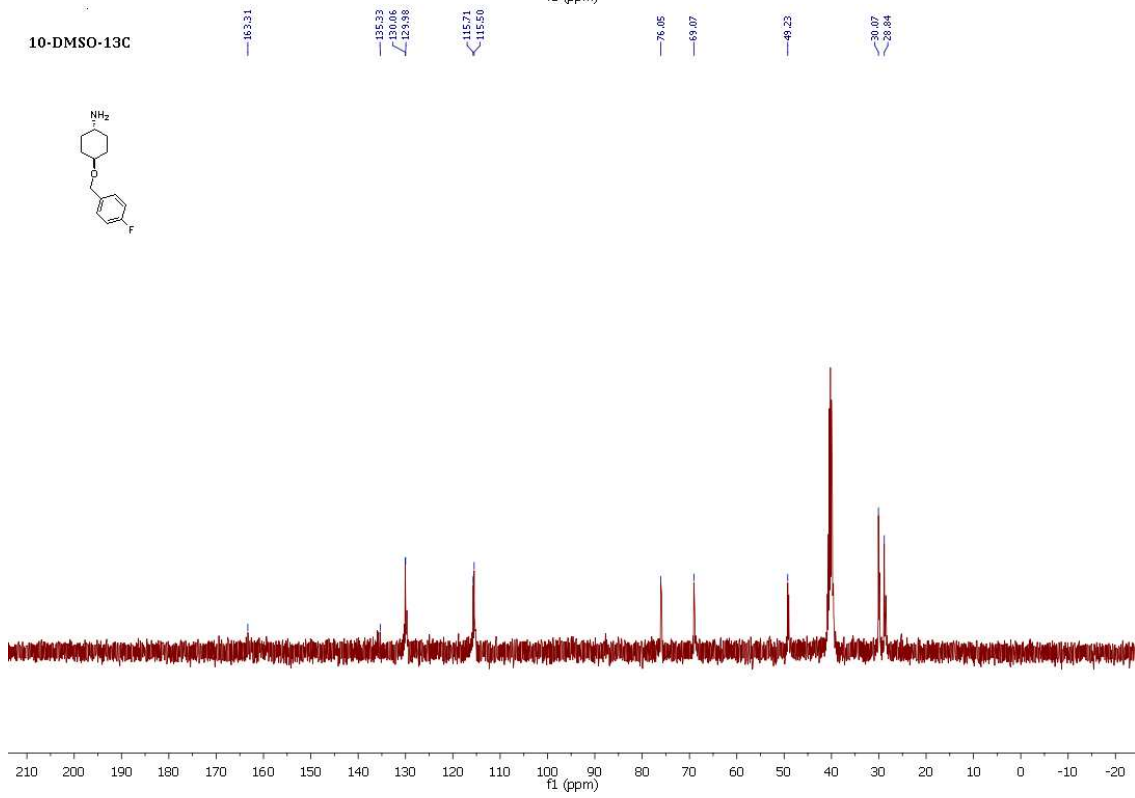

V. Structural confirmation data for the synthesized ureas: **I-11o**, **I-12o**, **I-14-20** and **III-1-5**.

V.1.  $^1\text{H-NMR}$ ,  $^{13}\text{C-NMR}$  and  $^{19}\text{F-NMR}$  Spectra for compounds **I-11o**, **I-12o**, **I-14-20** and **III-1-5**.

I-11o- $\text{CDCl}_3$ -1H

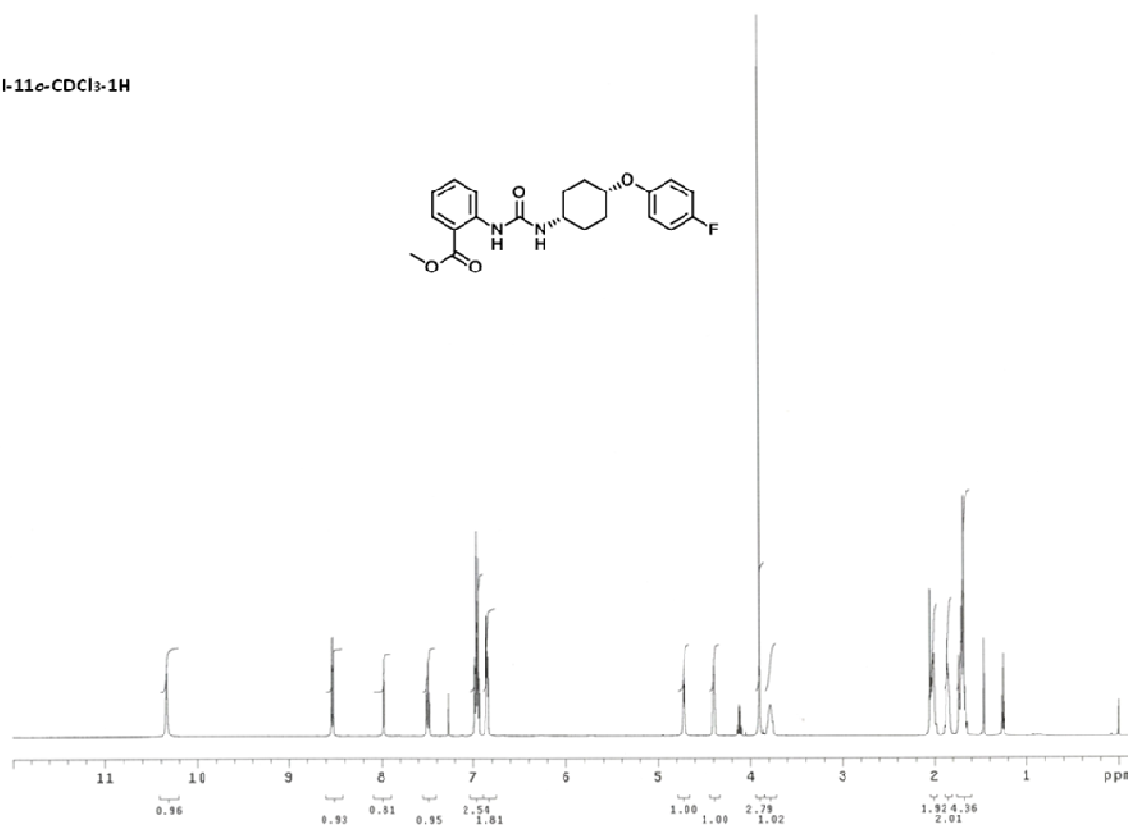

I-11-o-CDCl<sub>3</sub>-13C

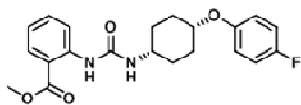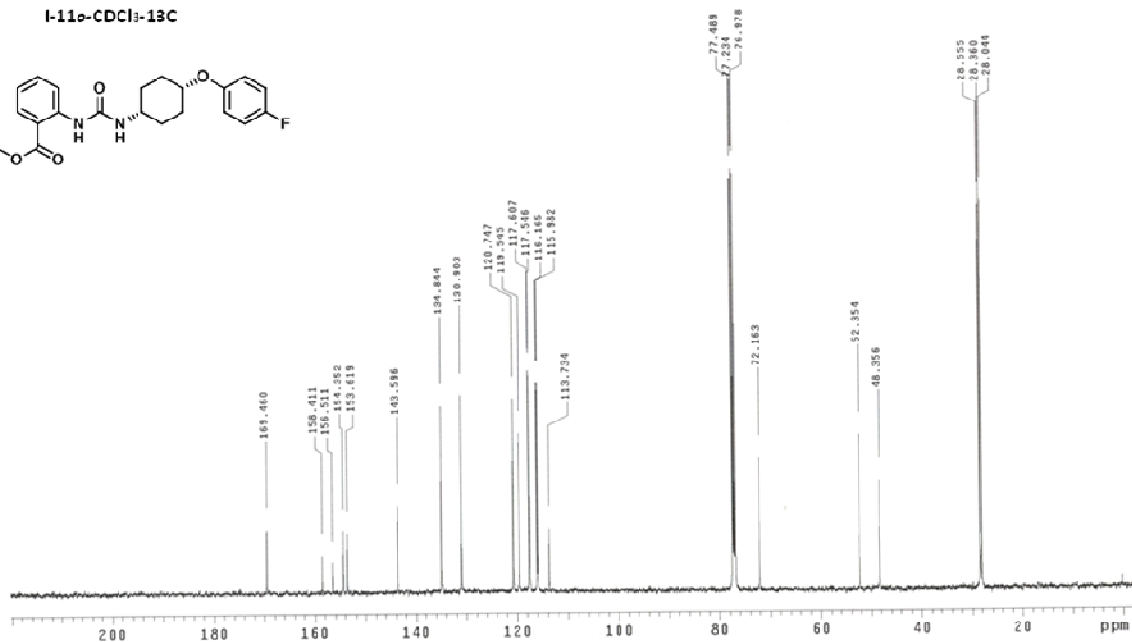

I-11-o-CDCl<sub>3</sub>-19F

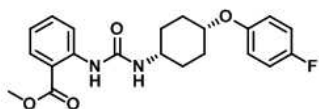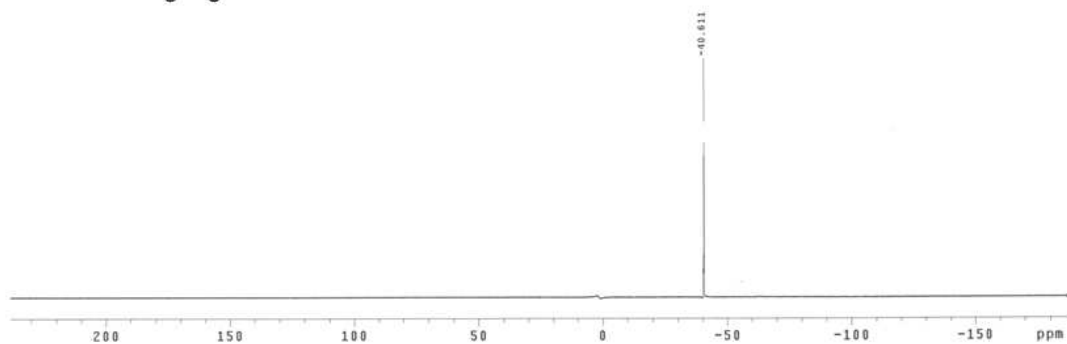



1-12-CDCl<sub>3</sub>-1H

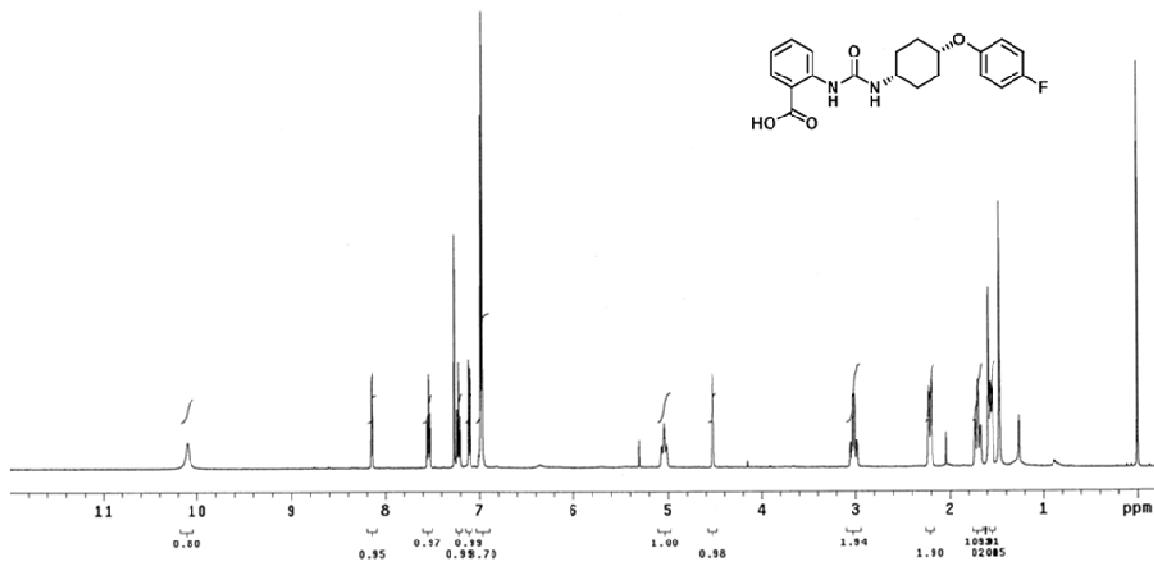

I-12o-CDCl3-13C

11A

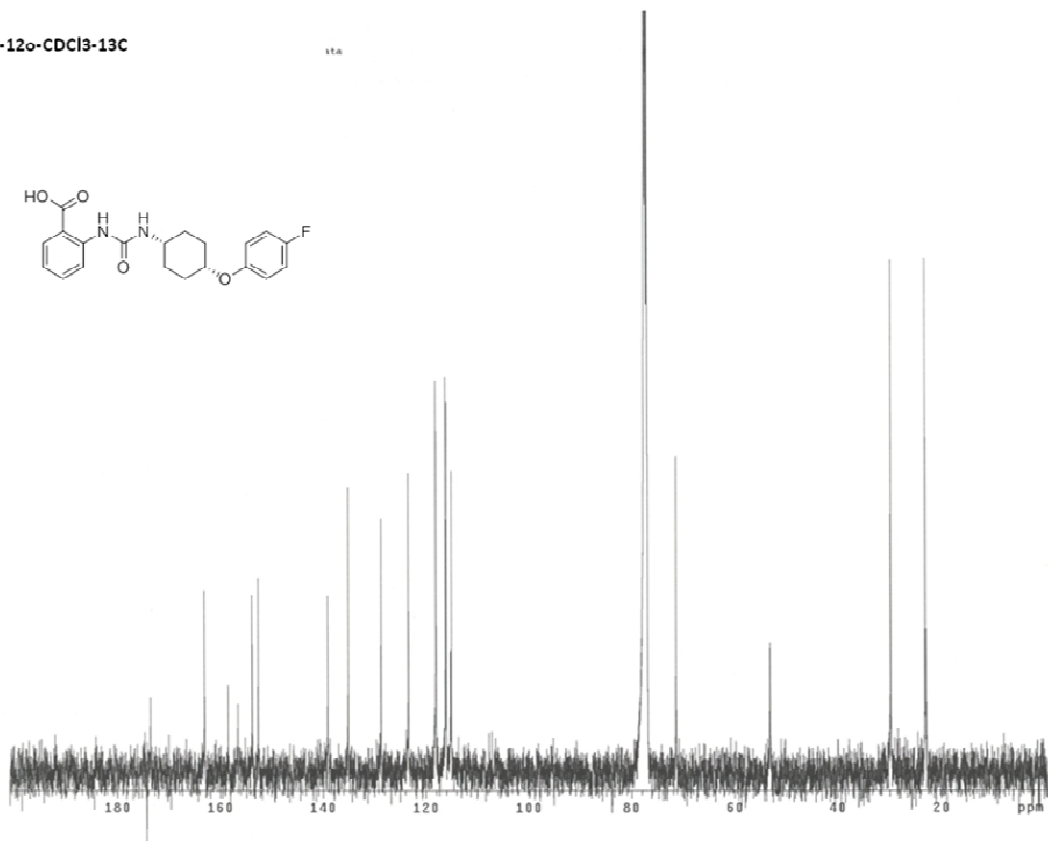

I-12o-CDCl3-19F

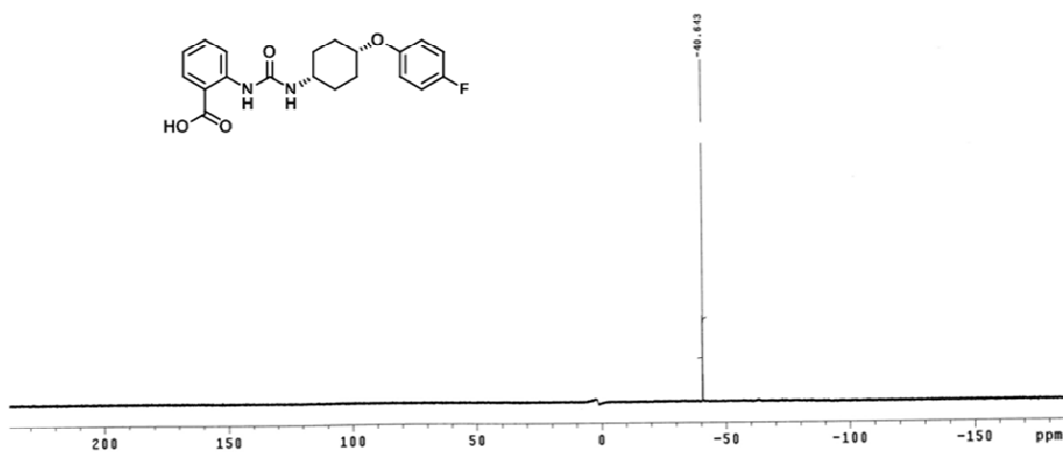

I-14-DMSO-1H

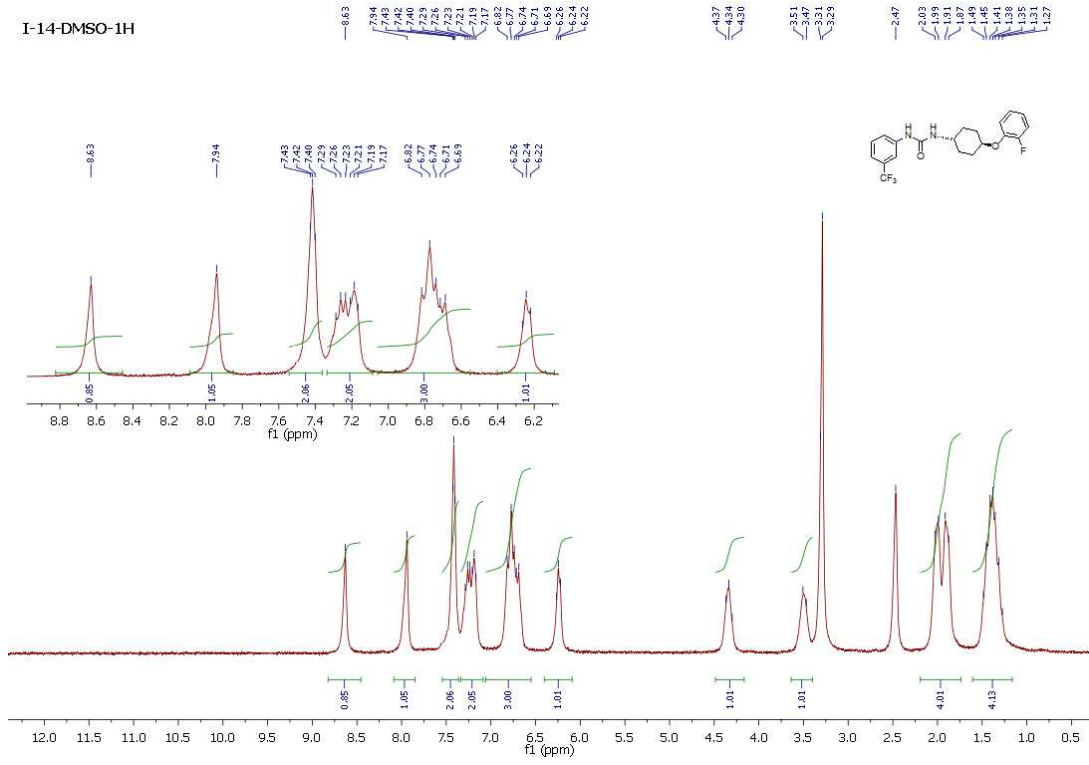

I-14-DMSO-13C

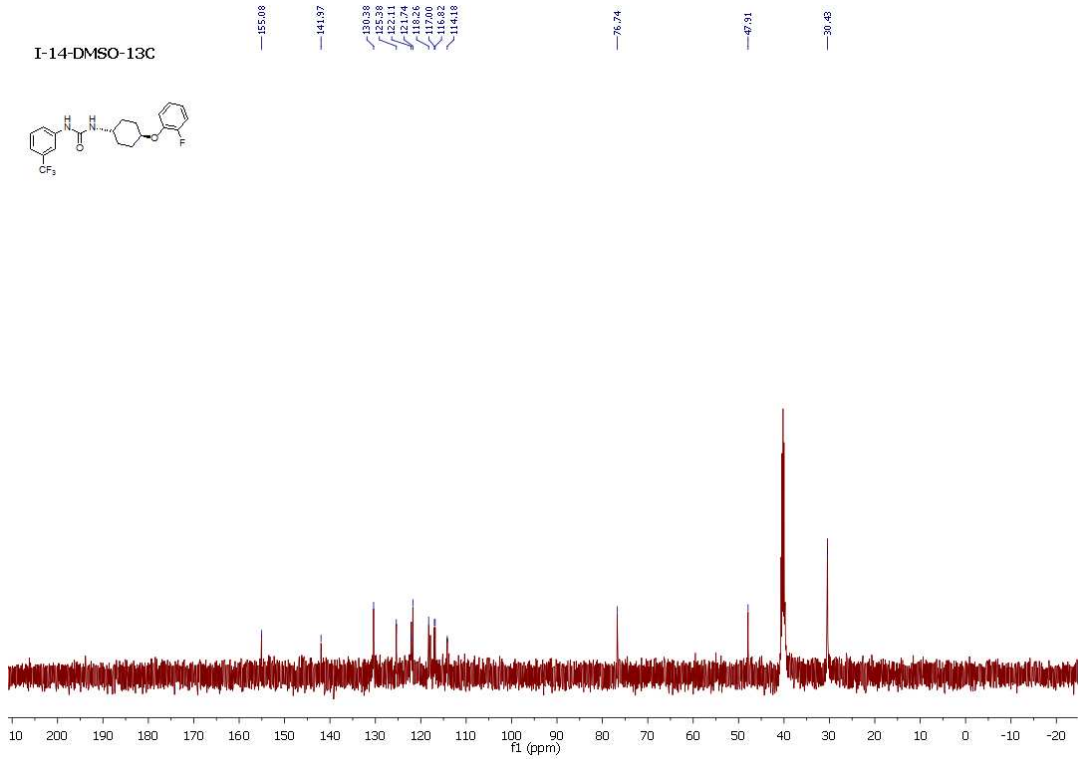

I-14-DMSO-19F

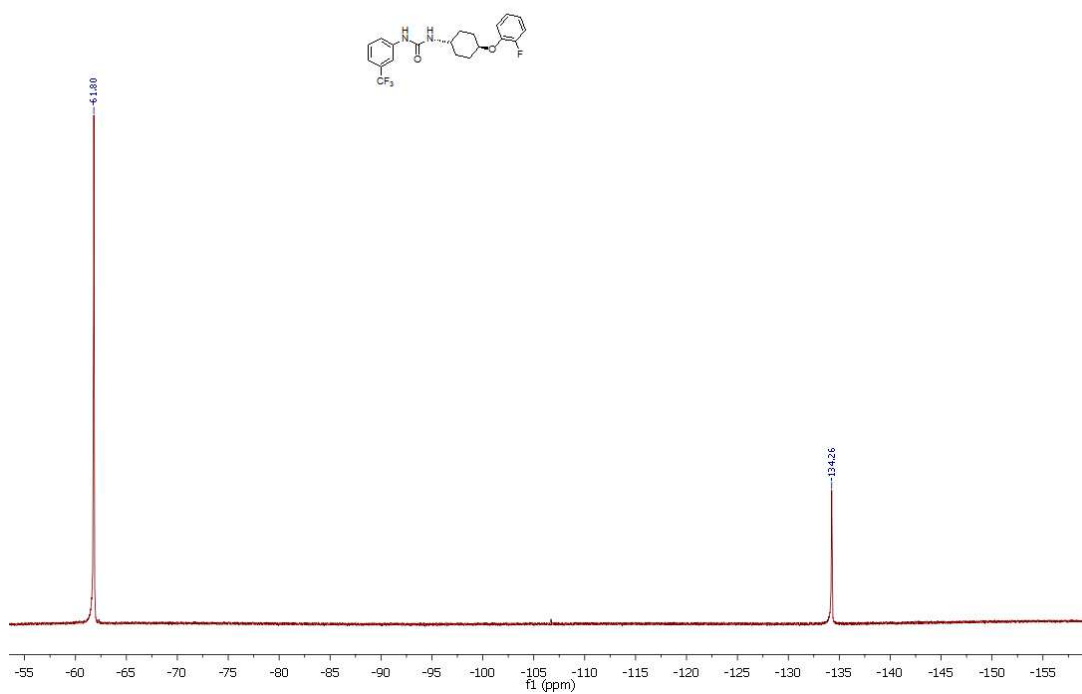

I-15-DMSO-1H

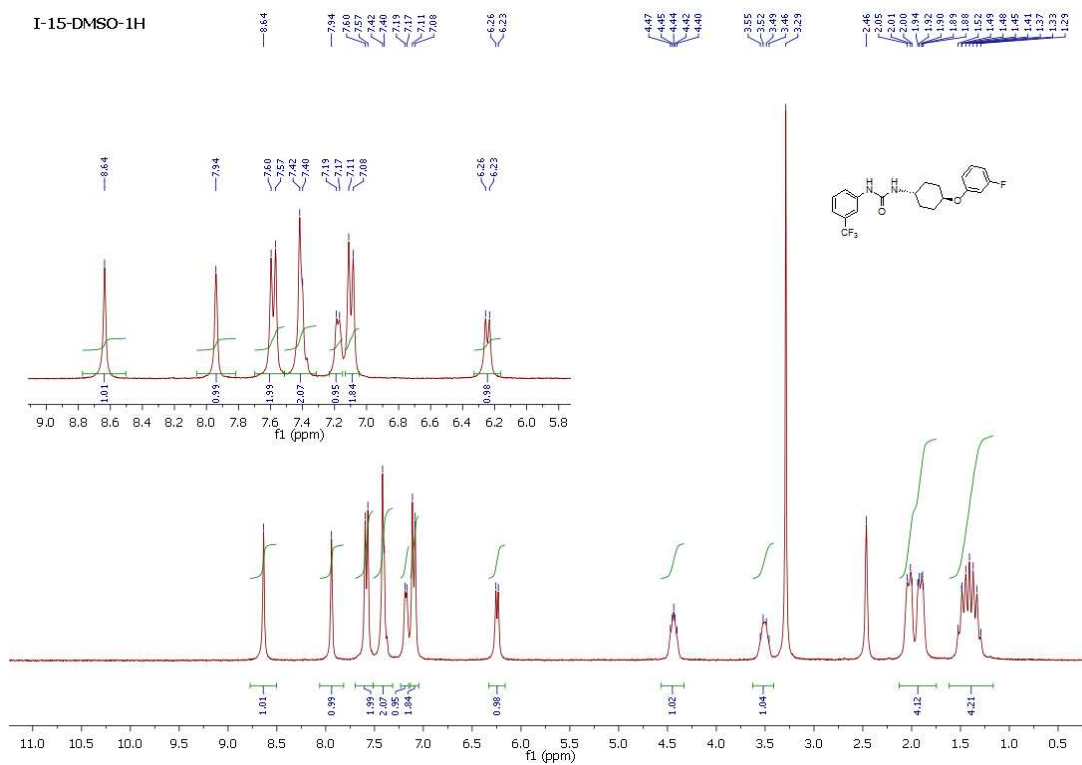

I-15-DMSO-13C

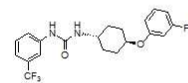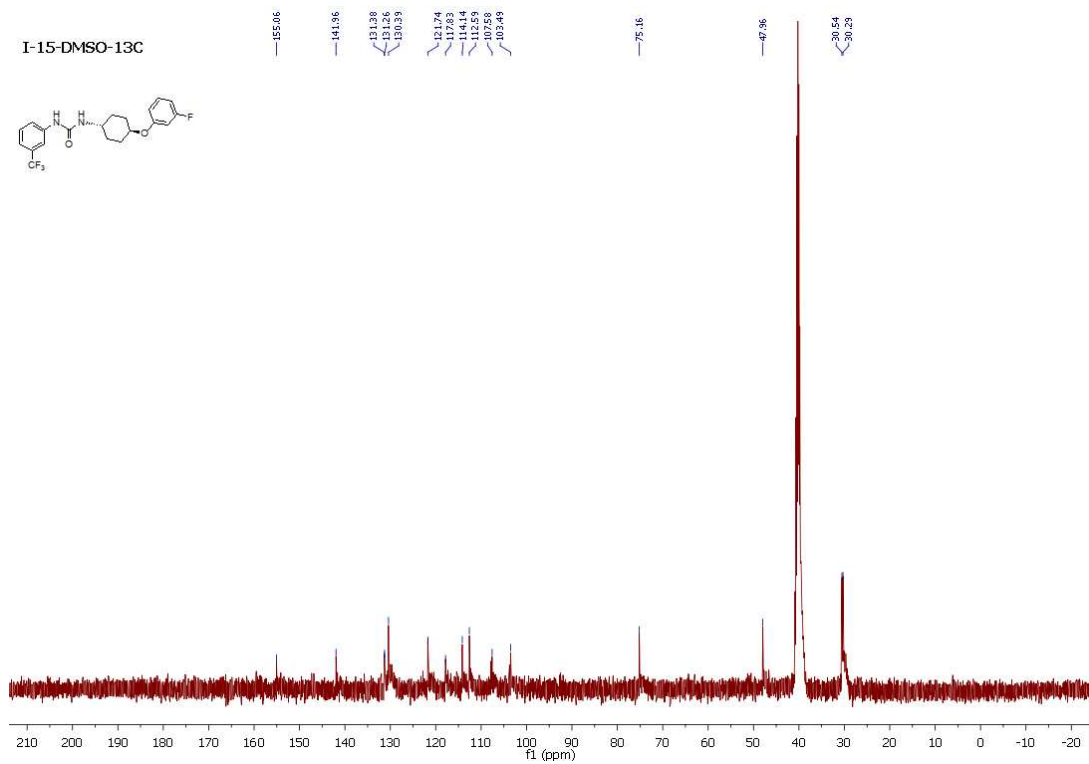

I-15-DMSO-19F

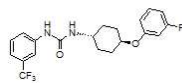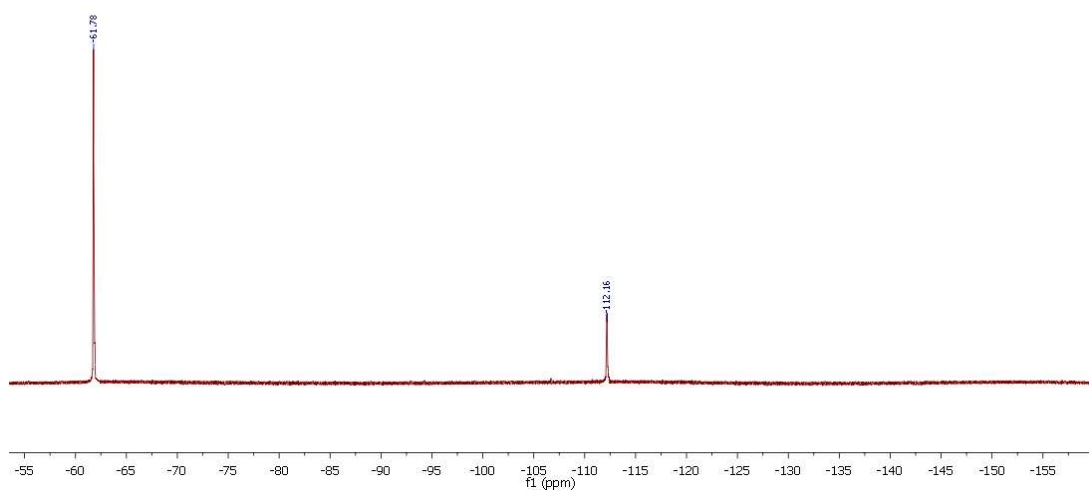

I-16-DMSO-1H

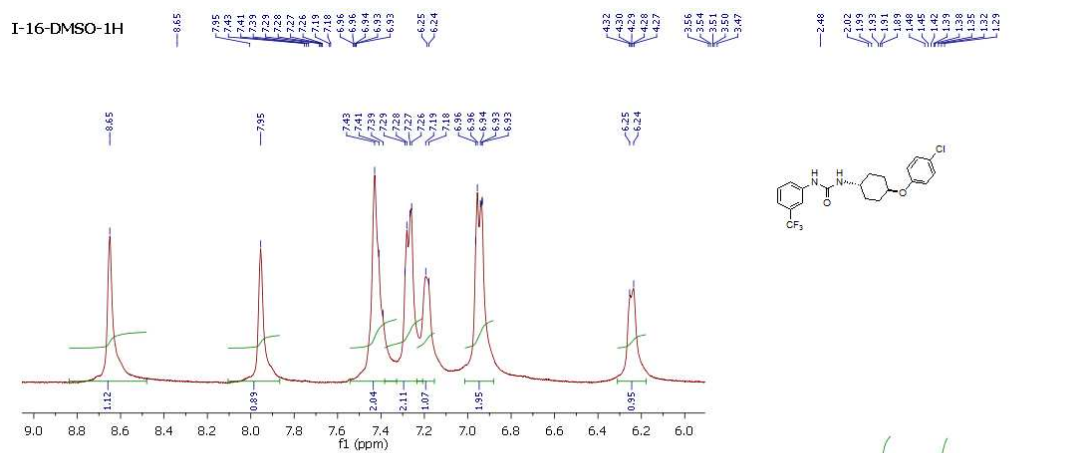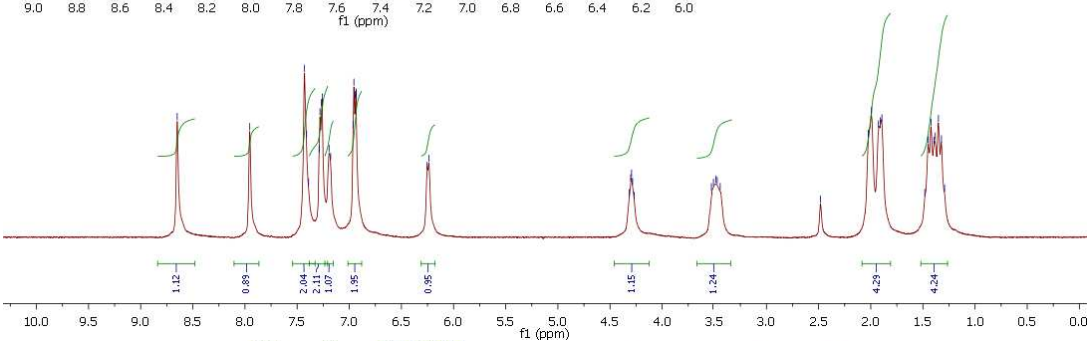

I-16-DMSO-13C

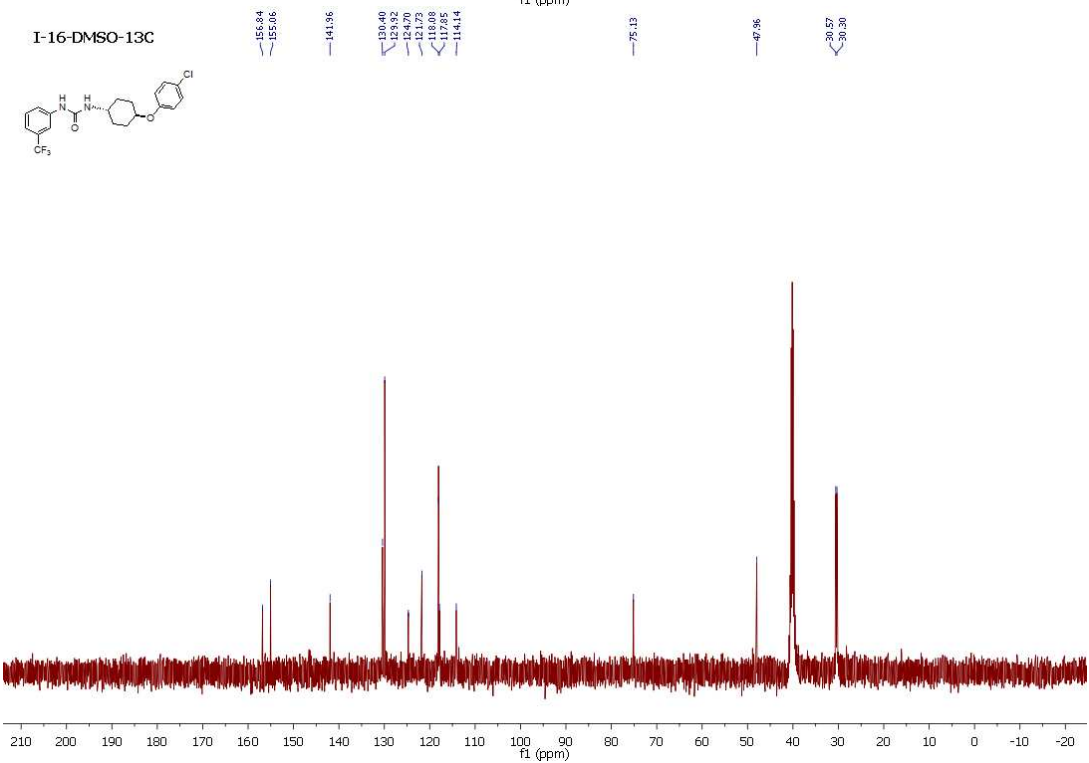

I-16-DMSO-19F

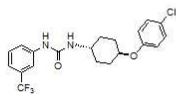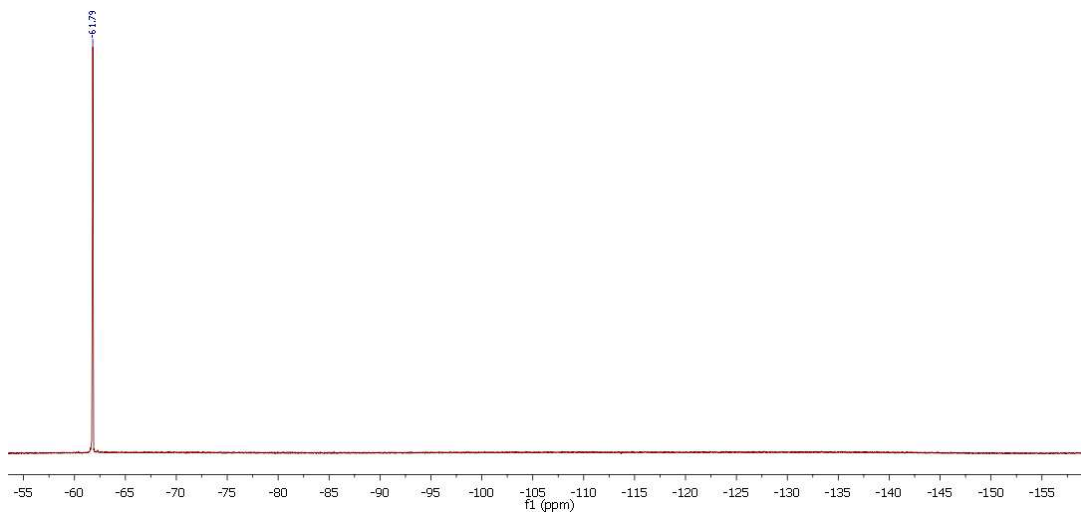

I-17-DMSO-1H

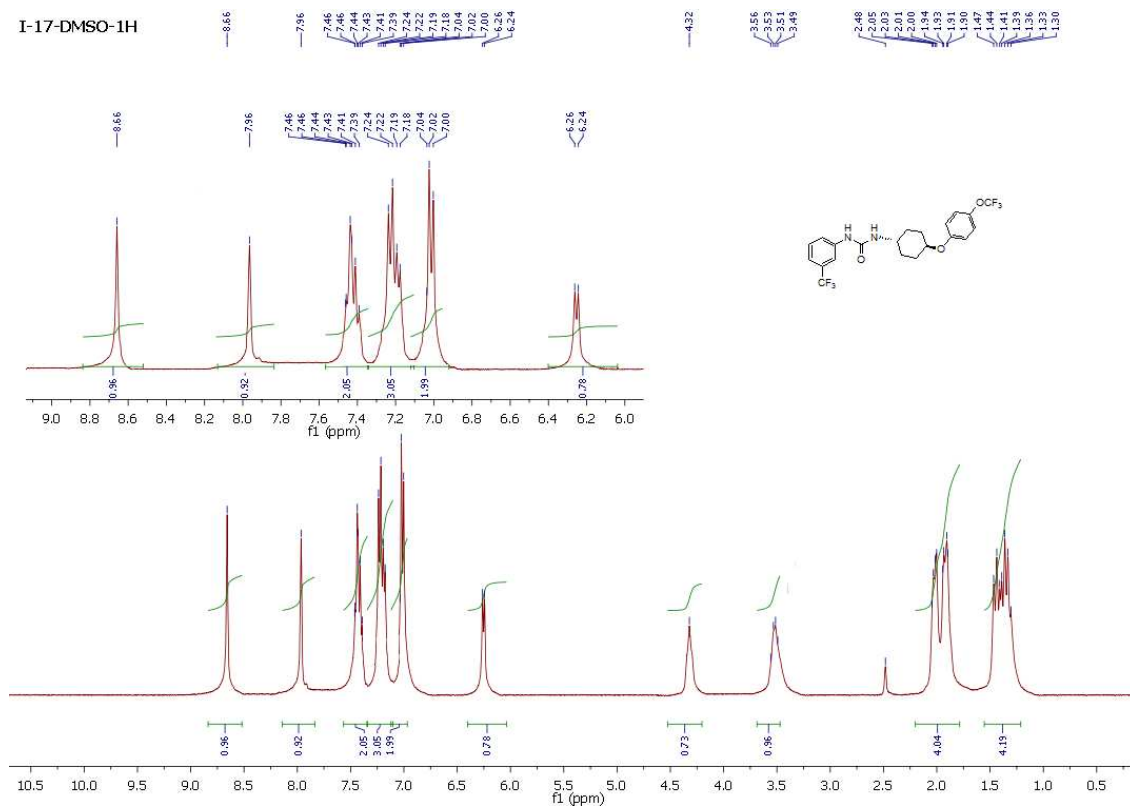

I-17-DMSO-19F

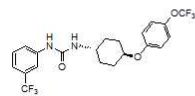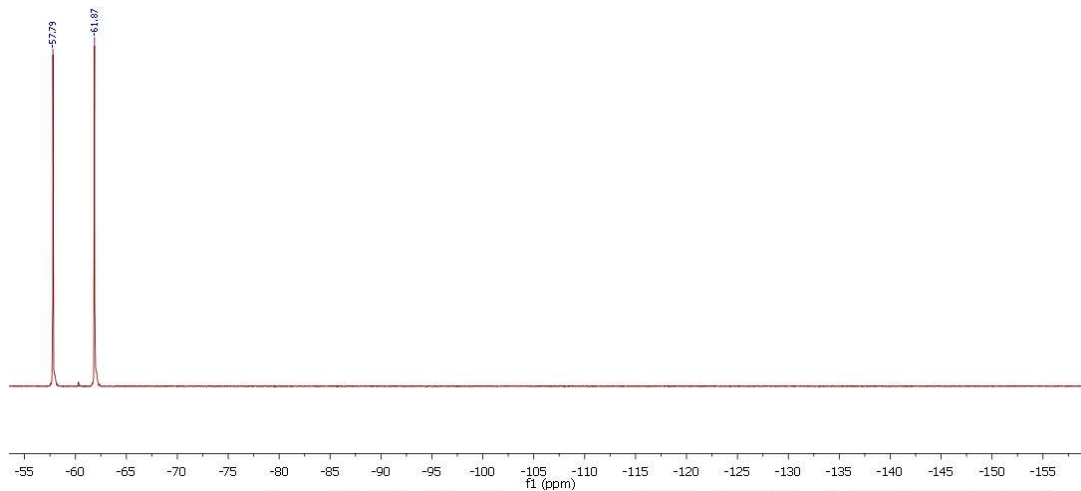

I-18-DMSO-1H

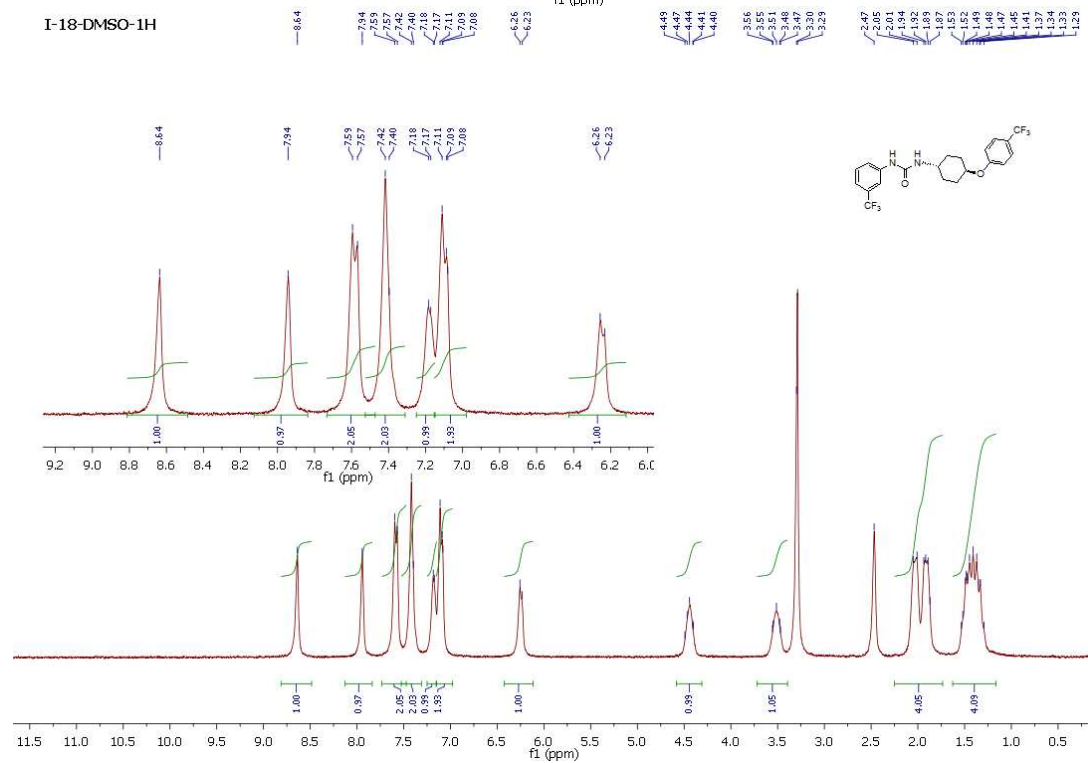



I-18-DMSO-13C

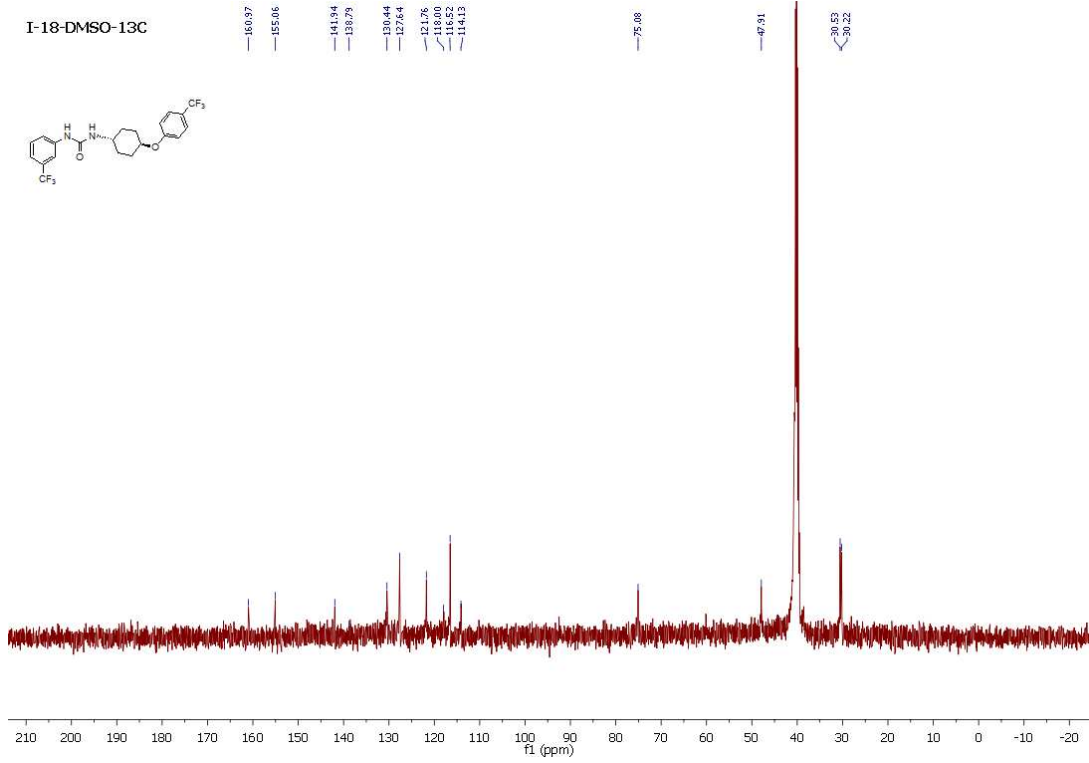

I-18-DMSO-19F

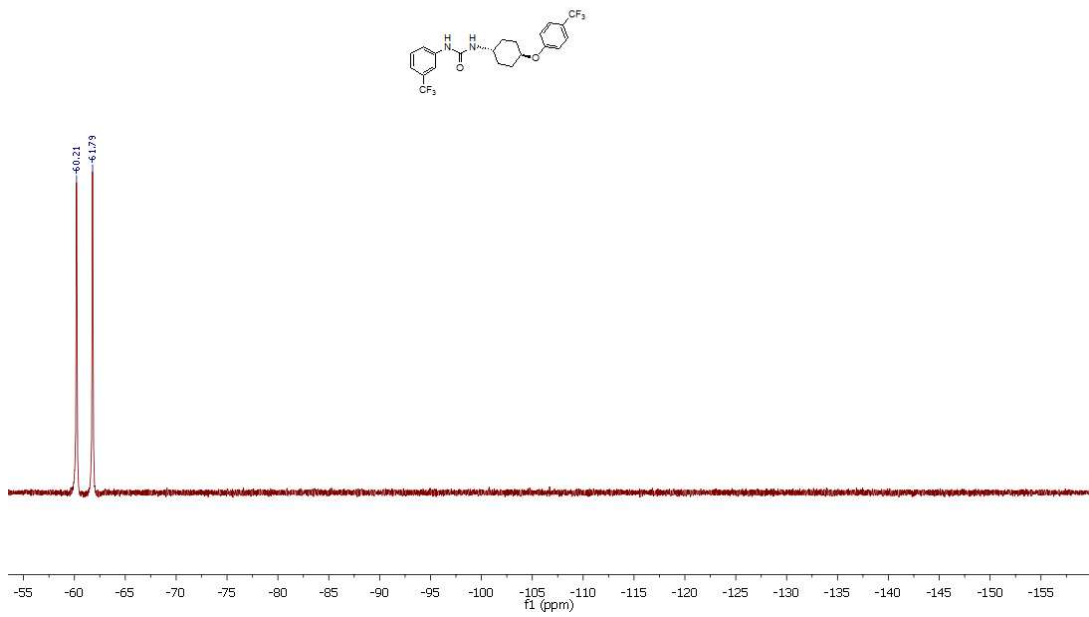

I-19-DMSO-1H

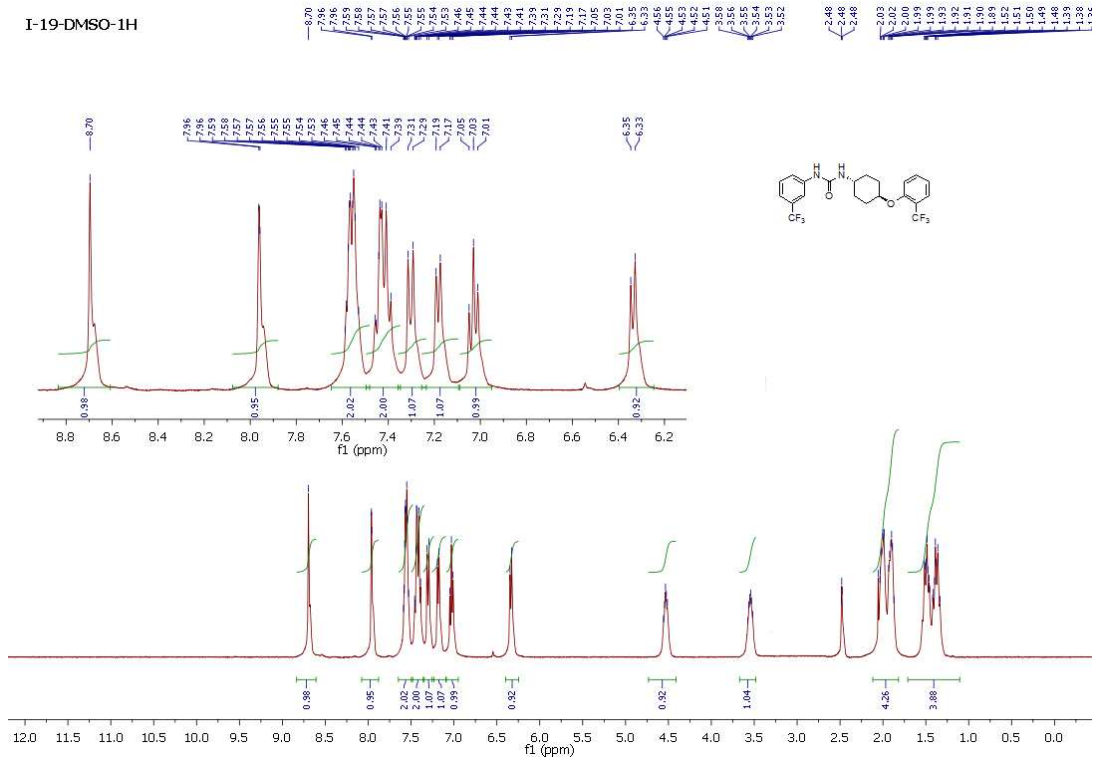

I-19-DMSO-13C

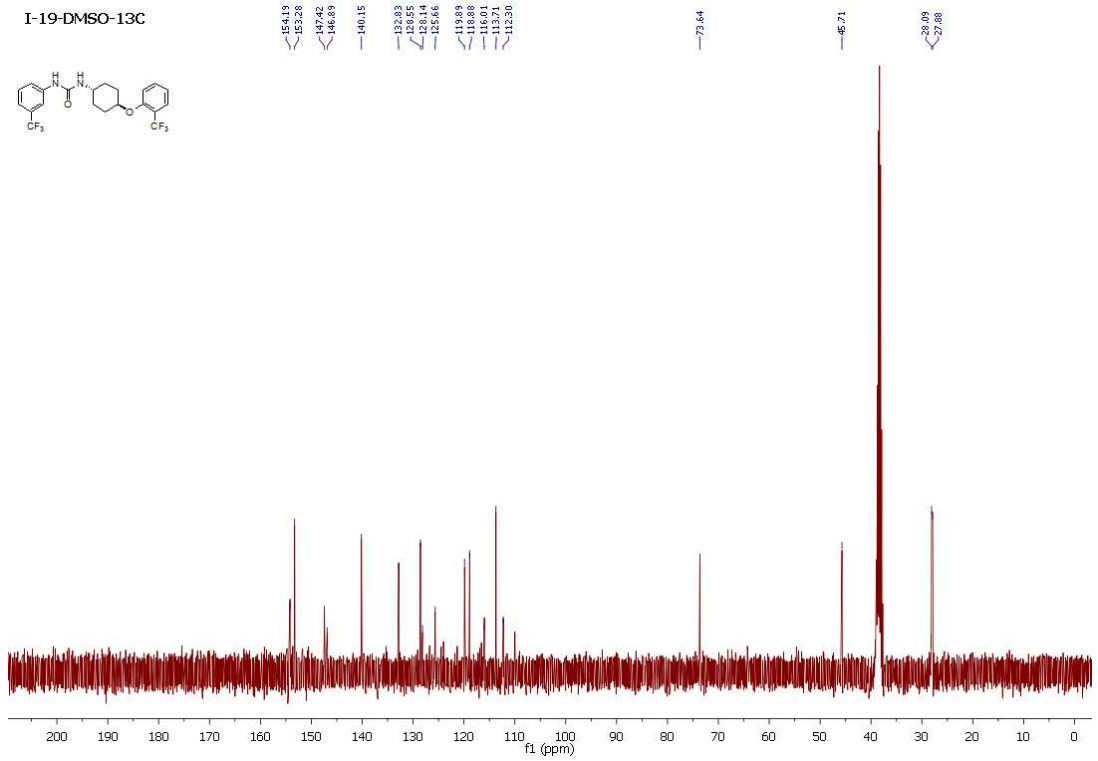

I-19-DMSO-19F

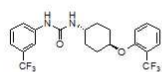

62.10  
62.71

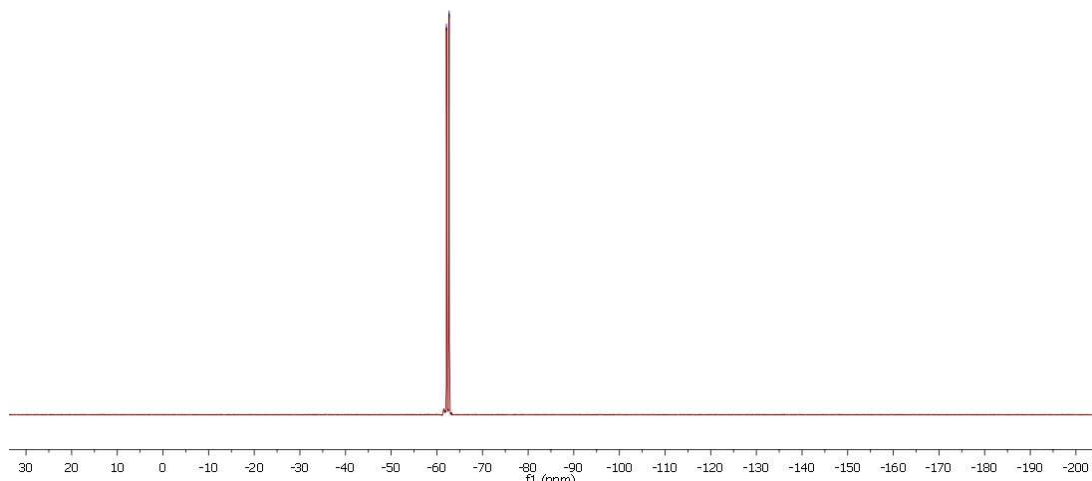

I-20-DMSO-1H

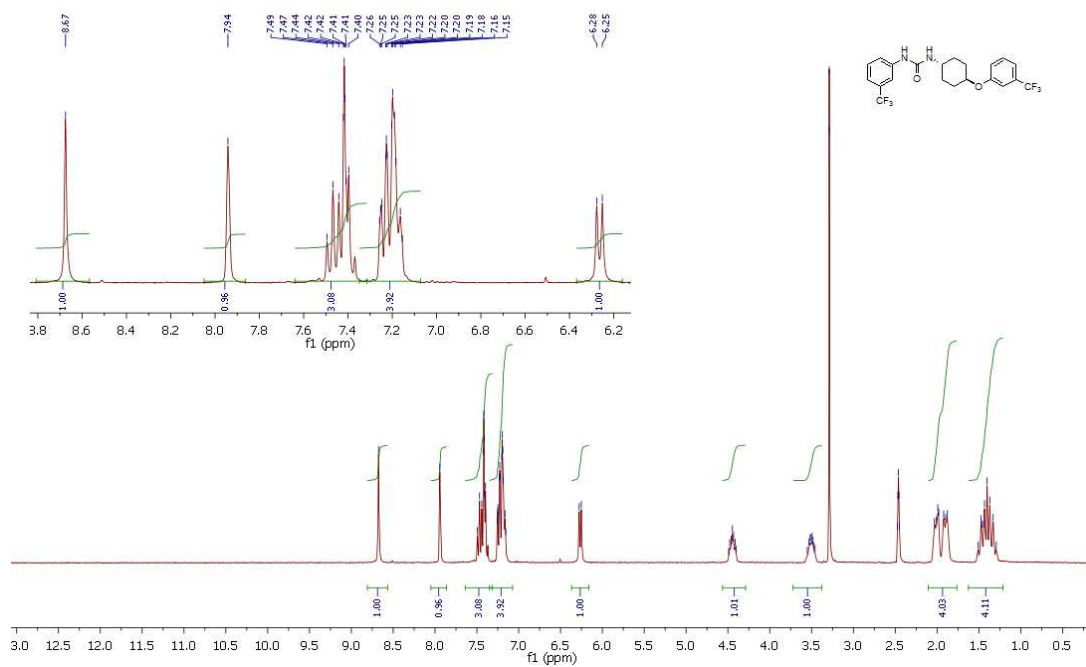

I-20-DMSO-13C

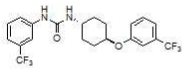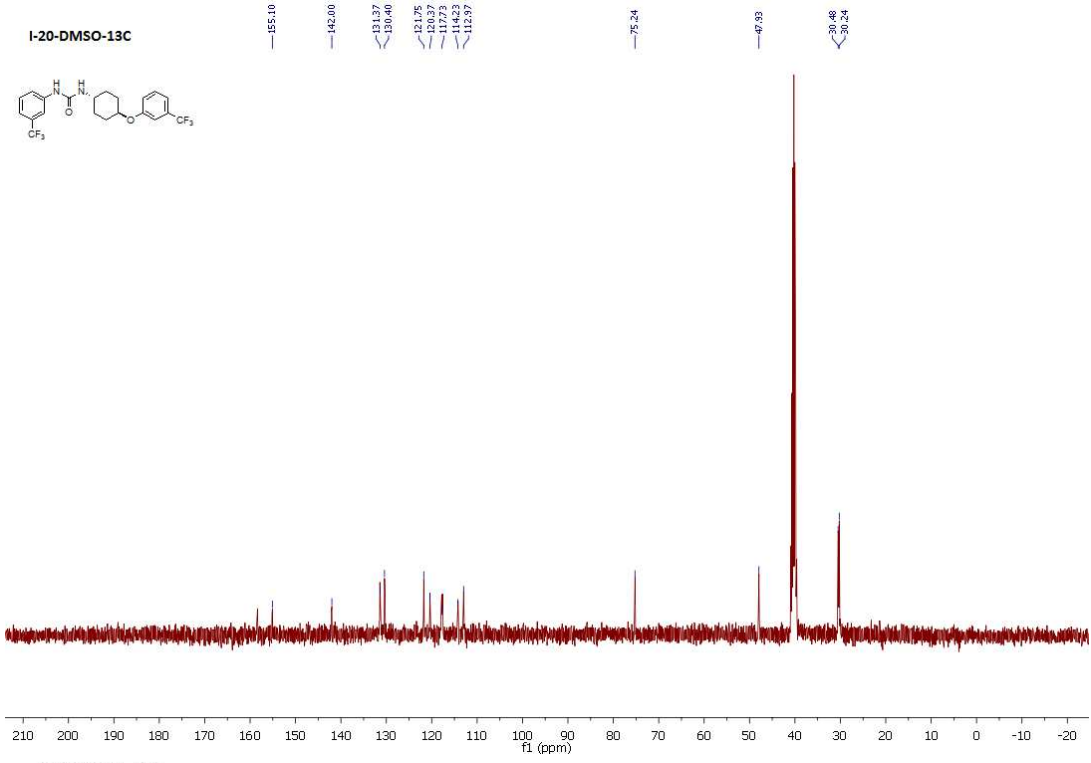

I-20-DMSO-19F

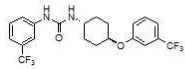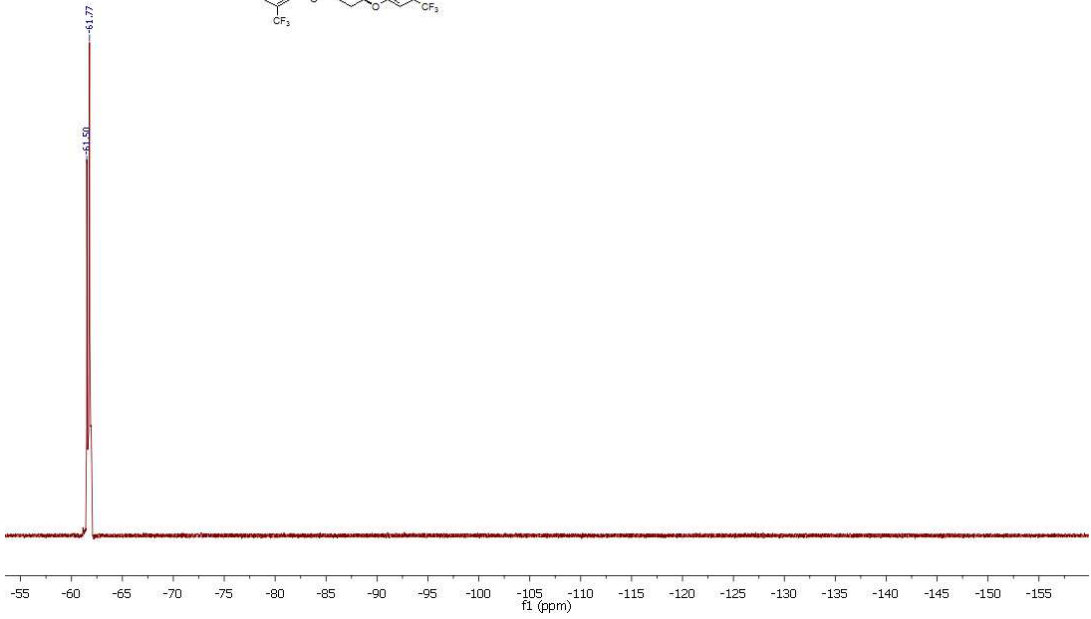

III-1-DMSO-1H

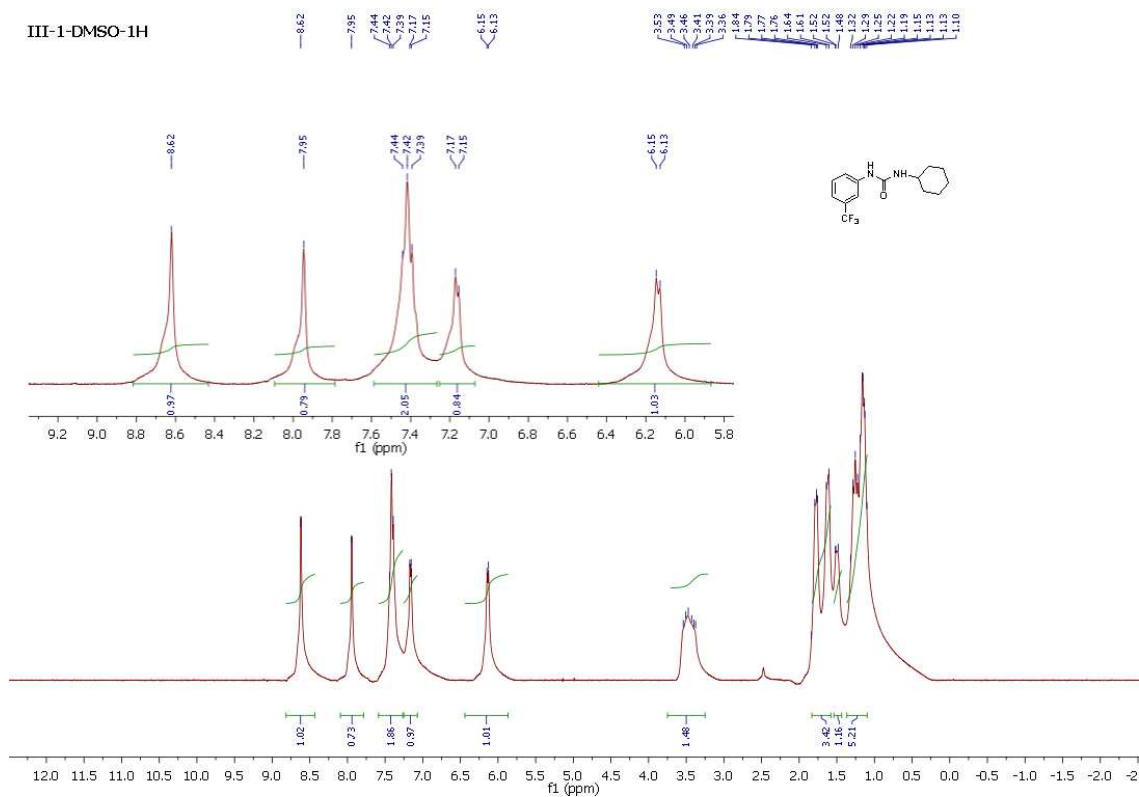

III-1-DMSO-13C

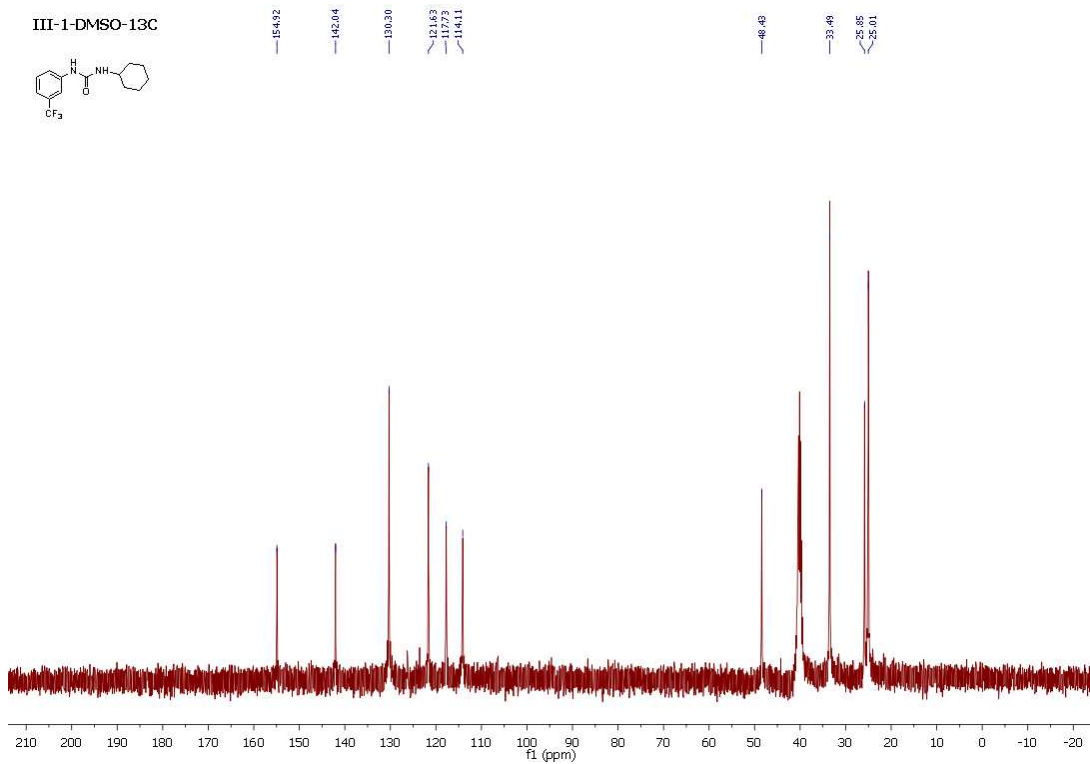

III-1-DMSO-19F

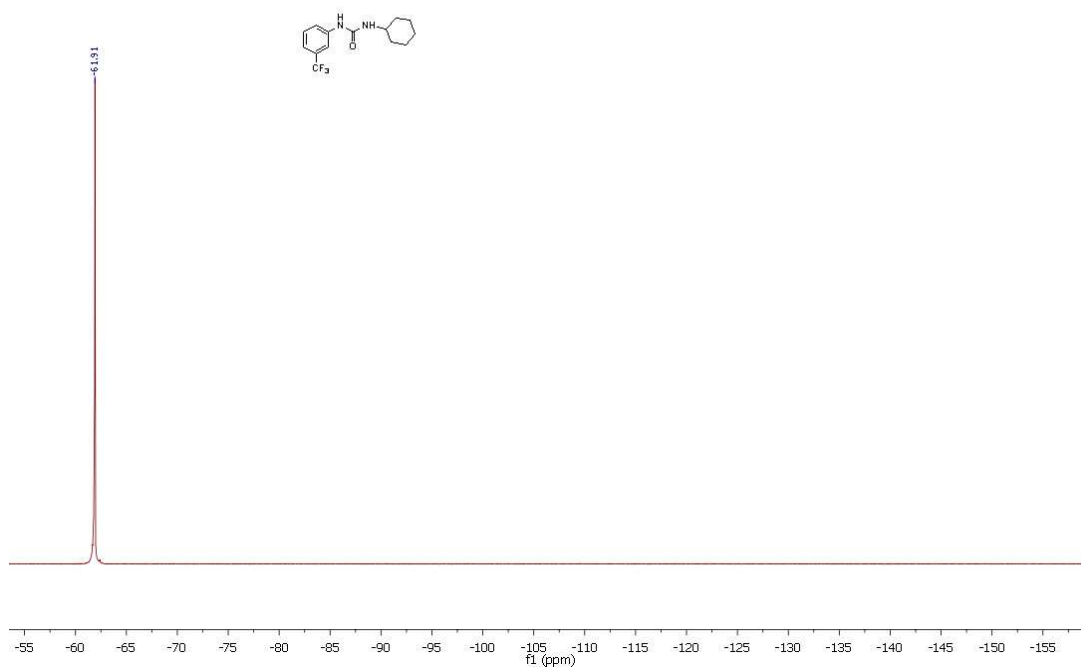

III-2-DMSO-1H

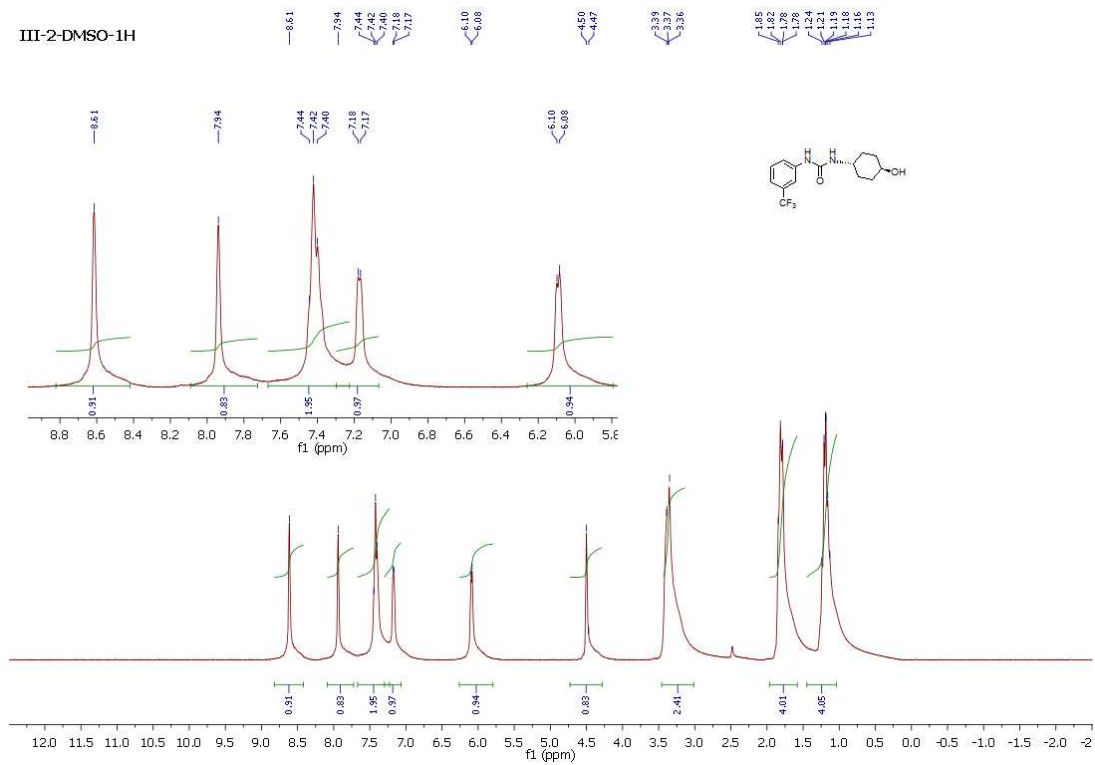

III-2-DMSO-13C

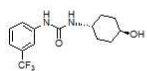

155.07  
142.01  
130.31  
121.71  
117.79  
114.19  
68.88  
40.45  
34.45  
31.32

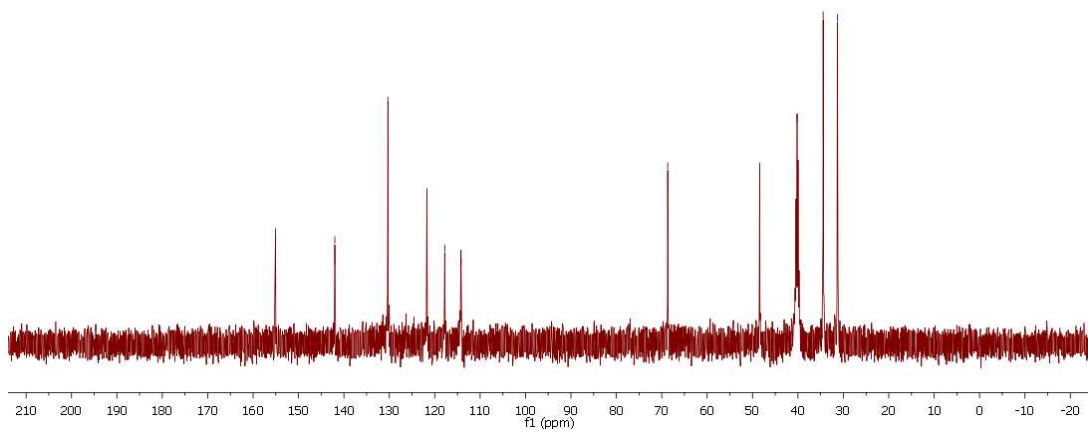

III-2-DMSO-19F

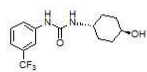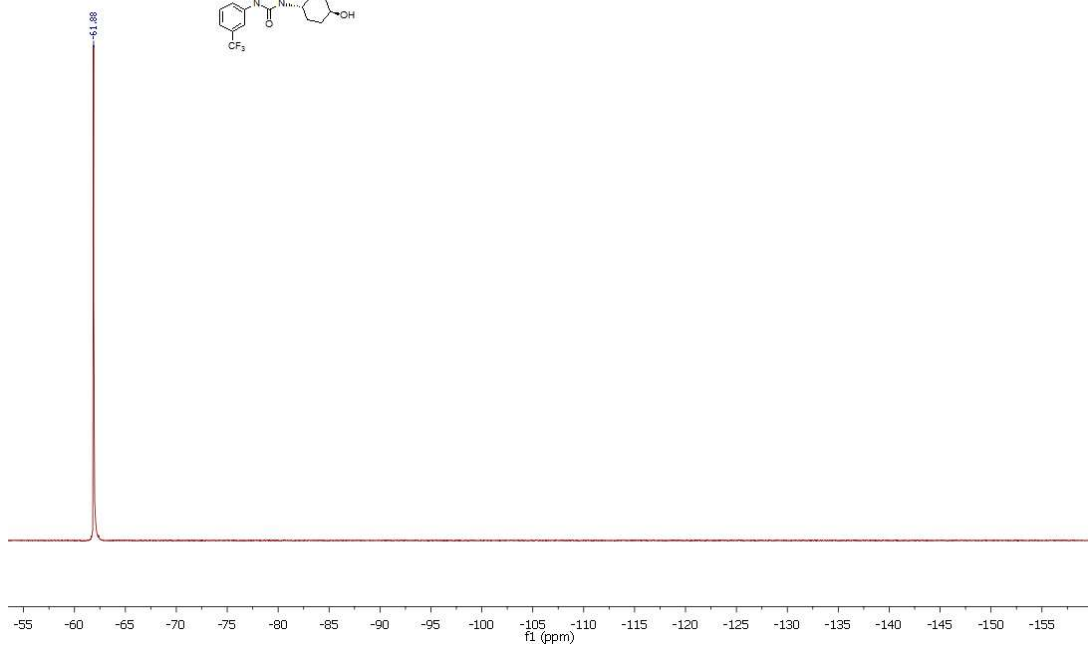

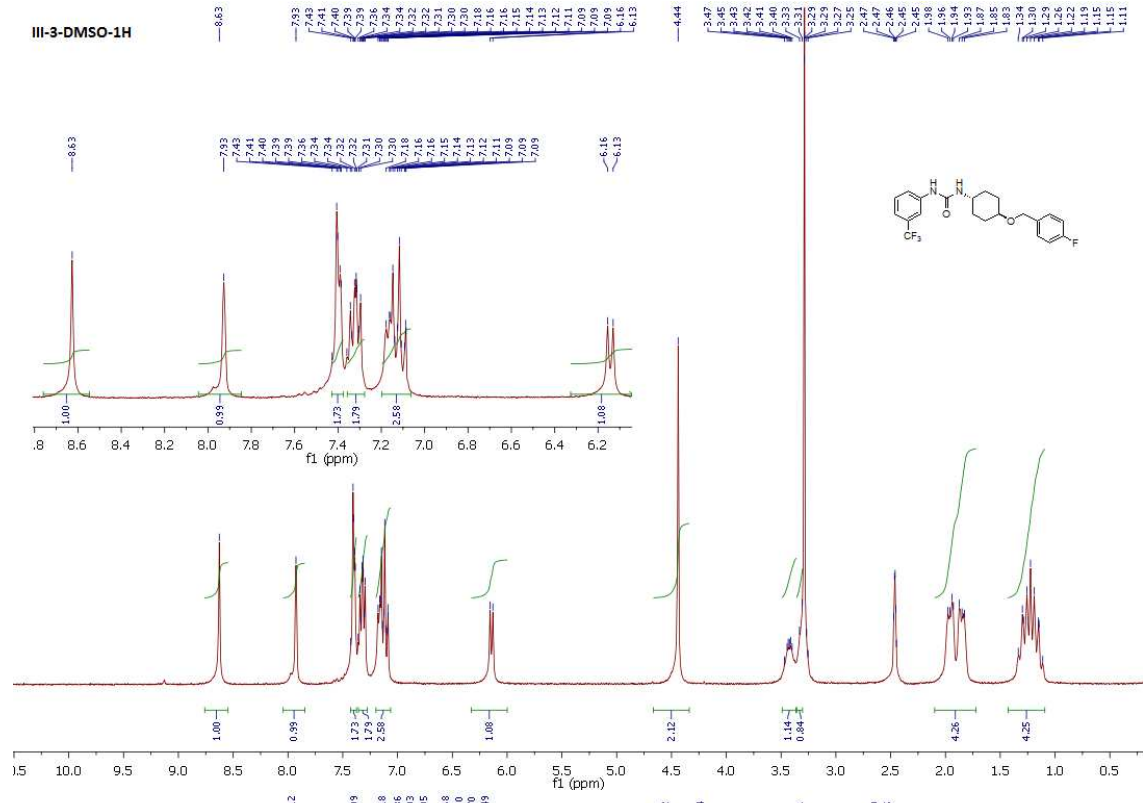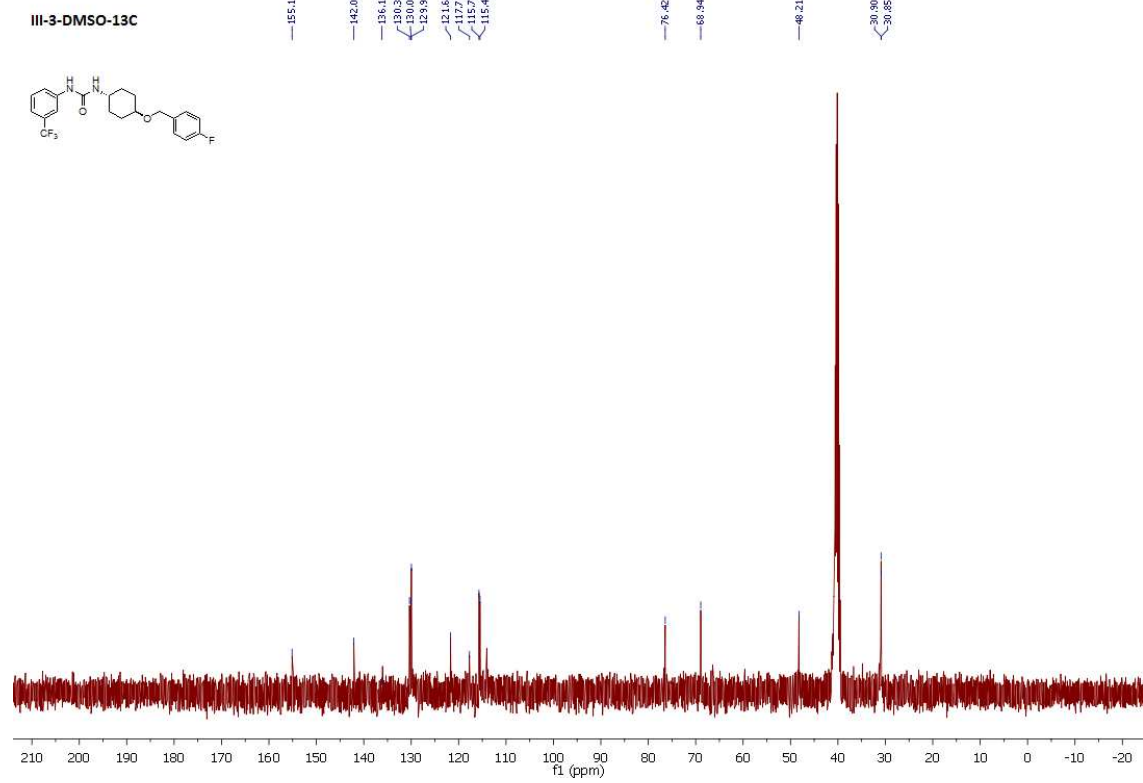



III-3-DMSO-19F

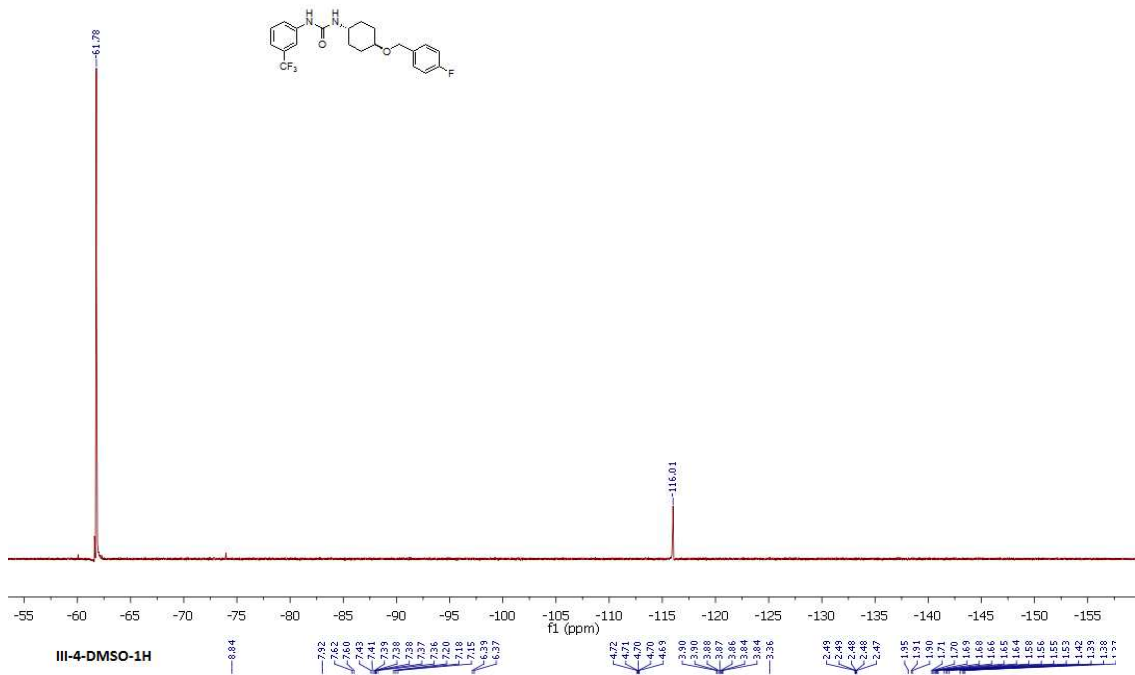

III-4-DMSO-1H

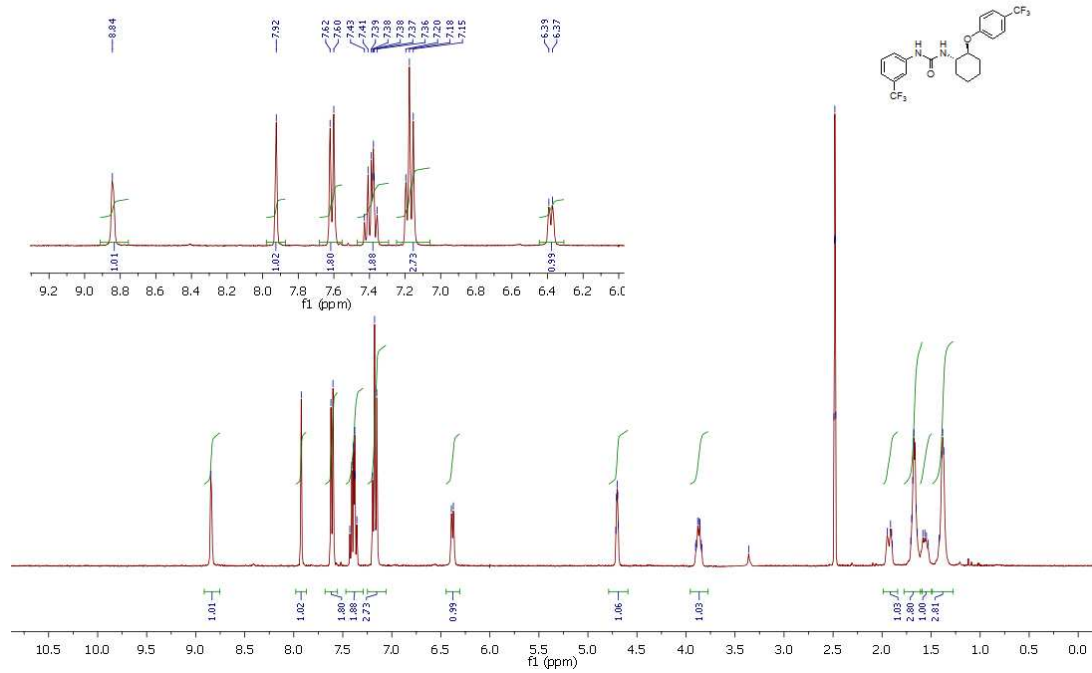

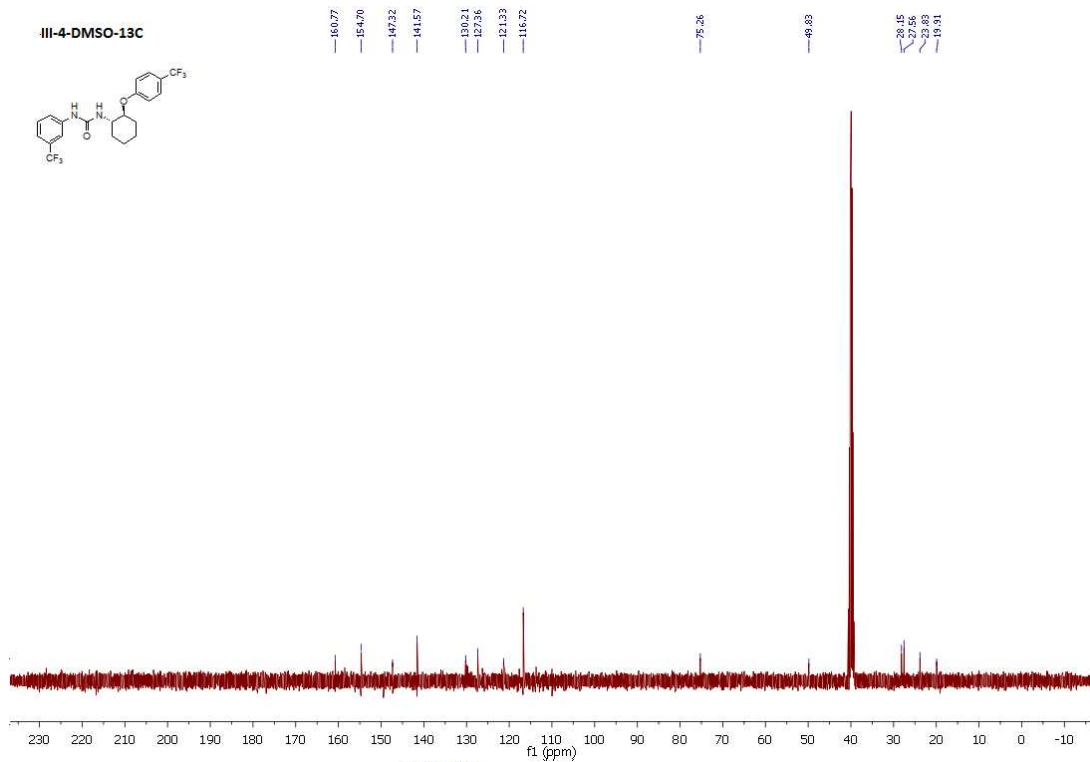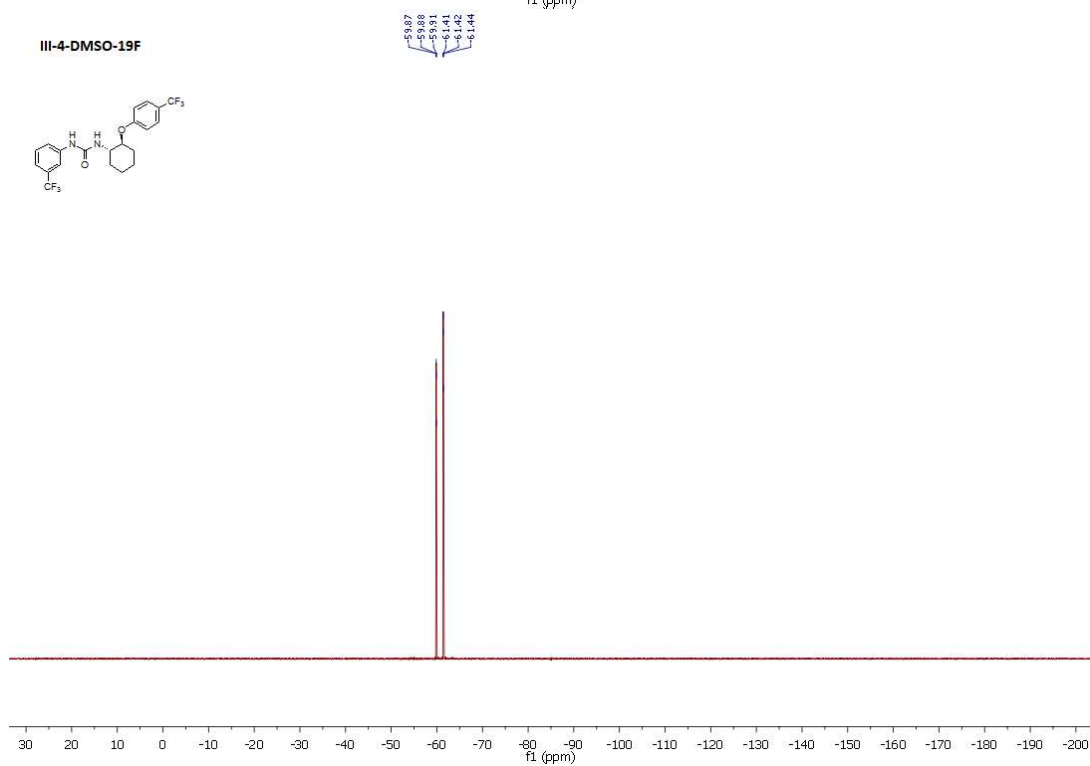

III-5-DMSO-1H

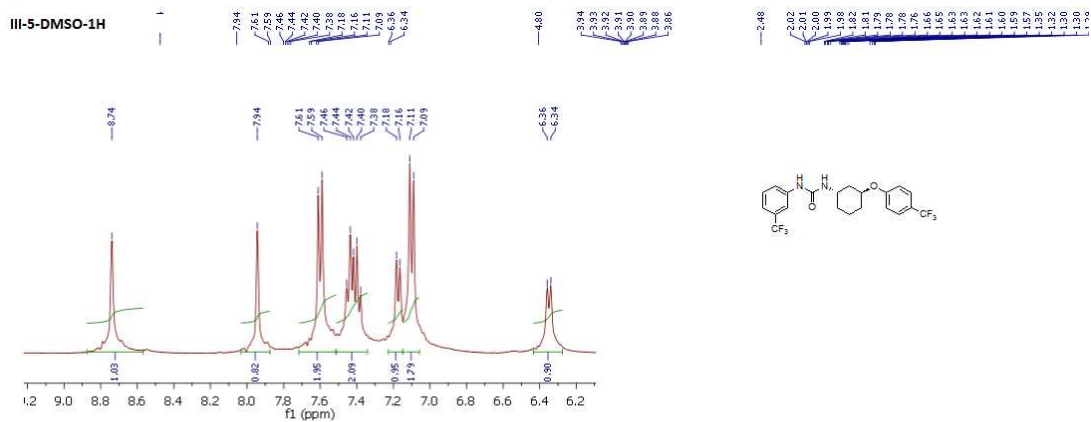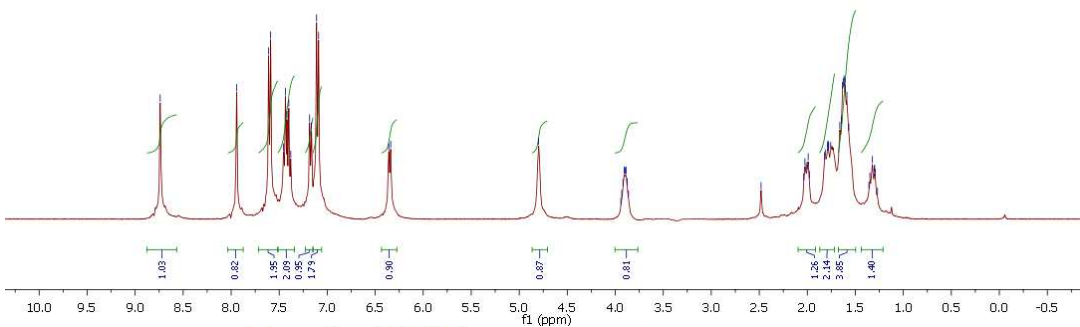

III-5-DMSO-13C

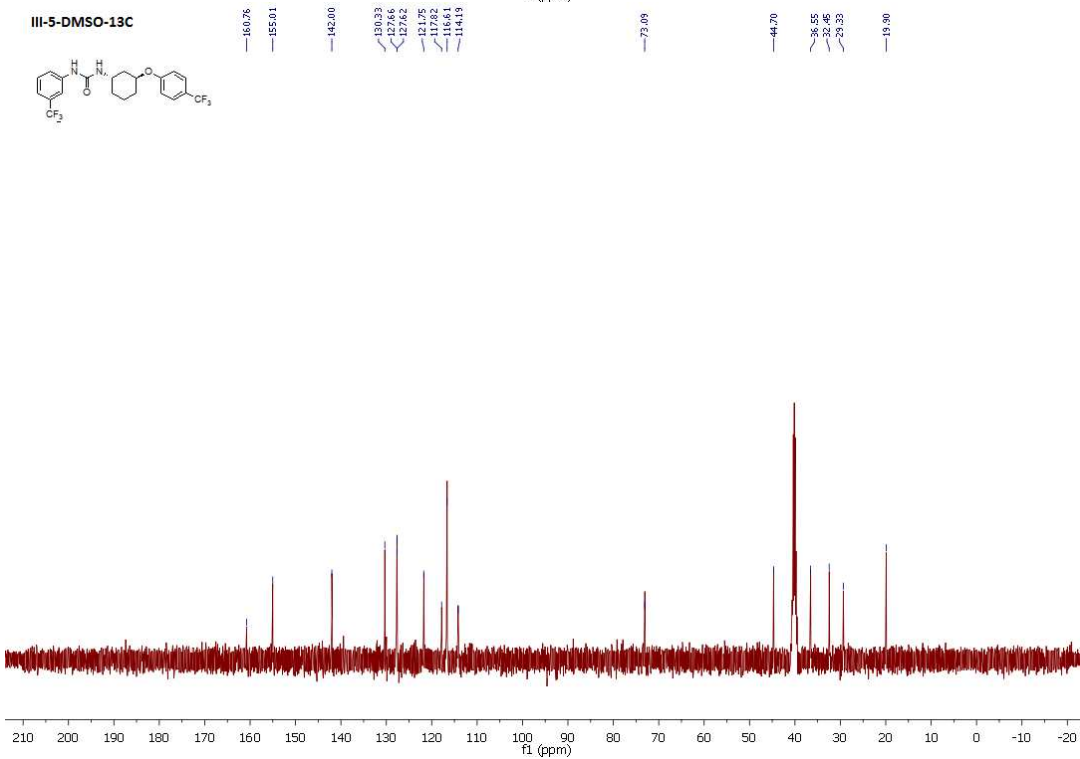

III-5-DMSO-19F

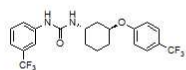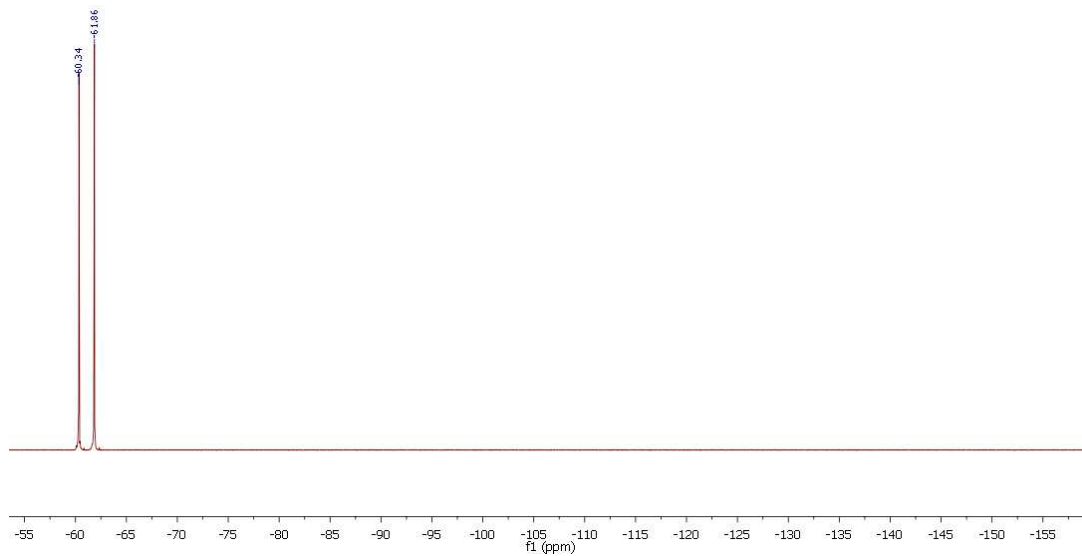

V.2. Mass confirmation data for compounds I-11o, I-12o, I-14-20 and III-1-5.

**I-11o**

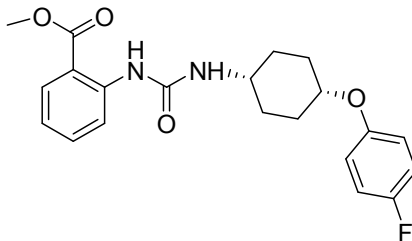

Chemical Formula: C<sub>21</sub>H<sub>23</sub>FN<sub>2</sub>O<sub>4</sub>

m/z: 386.16419 (100.0%), 387.16754 (22.7%), 388.17090 (2.5%)

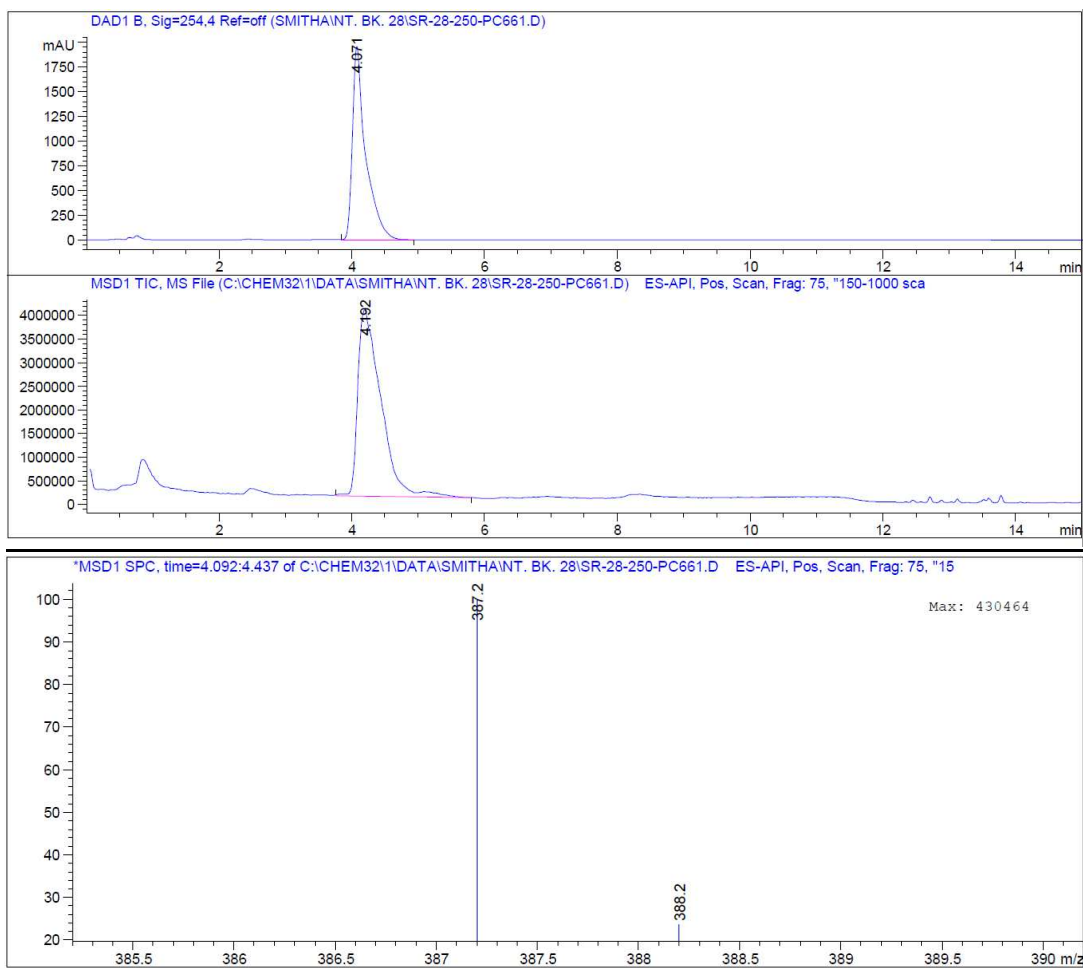

**I-12o**

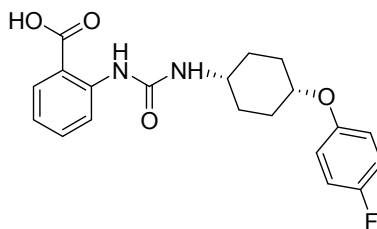

Chemical Formula: C<sub>20</sub>H<sub>21</sub>FN<sub>2</sub>O<sub>4</sub>

m/z: 372.14854 (100.0%), 373.15189 (21.6%), 374.15525 (2.2%)

Additional Info : Peak(s) manually integrated

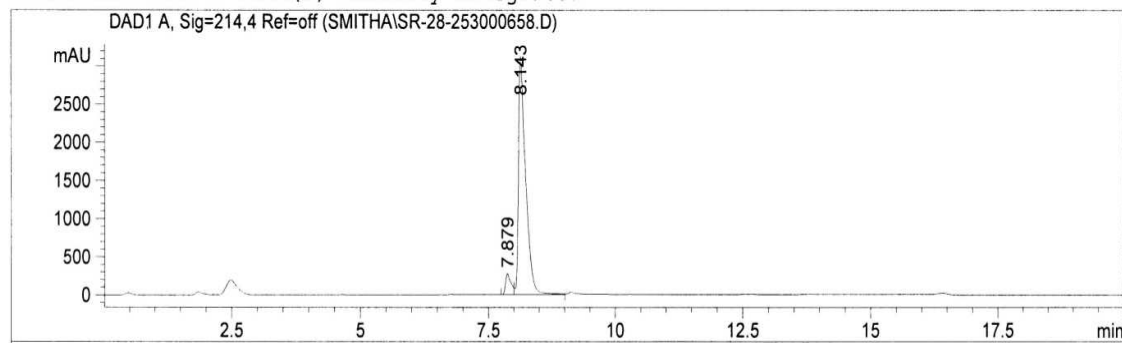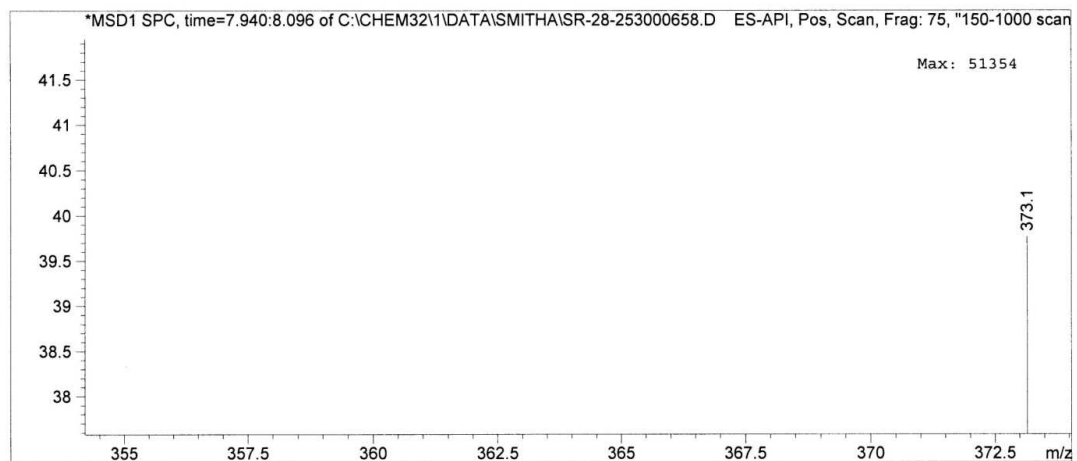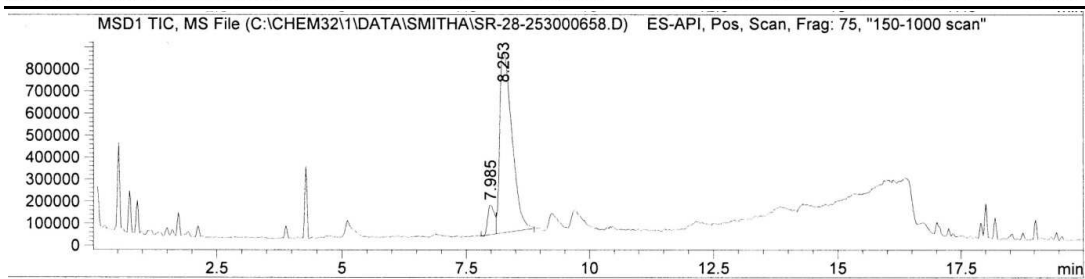

**I-14**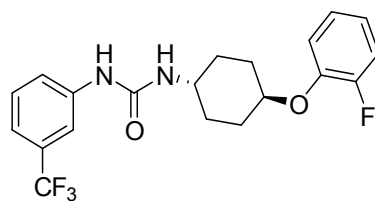

Chemical Formula:  $C_{20}H_{20}F_4N_2O_2$   
 m/z: 396.15 (100.0%), 397.15 (21.9%), 398.15 (2.8%)

| Compound Label                                                                      | RT    | Mass      | Abund | Formula                                                                      | Tgt Mass  |
|-------------------------------------------------------------------------------------|-------|-----------|-------|------------------------------------------------------------------------------|-----------|
| Cpd 1: C <sub>20</sub> H <sub>20</sub> F <sub>4</sub> N <sub>2</sub> O <sub>2</sub> | 0.137 | 396.14619 | 16922 | C <sub>20</sub> H <sub>20</sub> F <sub>4</sub> N <sub>2</sub> O <sub>2</sub> | 396.14609 |

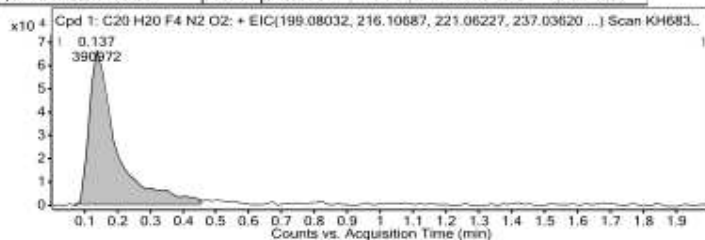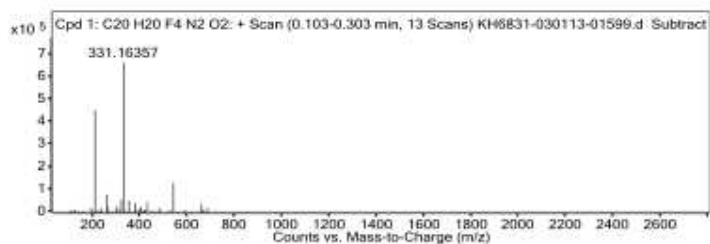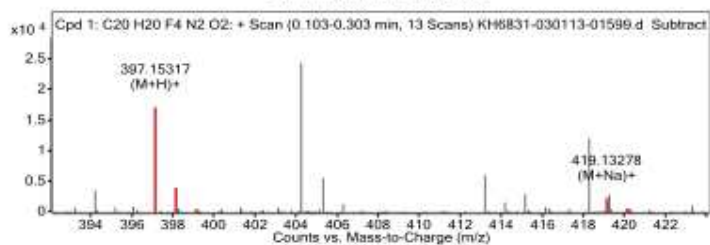

| m/z       | Calc m/z  | Diff(ppm) | z | Abund     | Formula                                                                        | Ion                 |
|-----------|-----------|-----------|---|-----------|--------------------------------------------------------------------------------|---------------------|
| 331.16357 |           |           |   | 664049.69 |                                                                                |                     |
| 397.15317 | 397.15337 | -0.49     | 1 | 16922.39  | C <sub>20</sub> H <sub>21</sub> F <sub>4</sub> N <sub>2</sub> O <sub>2</sub>   | (M+H) <sup>+</sup>  |
| 398.15783 | 398.15655 | 3.2       | 1 | 3960.71   | C <sub>20</sub> H <sub>21</sub> F <sub>4</sub> N <sub>2</sub> O <sub>2</sub>   | (M+H) <sup>+</sup>  |
| 399.17392 | 399.15942 | 36.32     | 1 | 425.66    | C <sub>20</sub> H <sub>21</sub> F <sub>4</sub> N <sub>2</sub> O <sub>2</sub>   | (M+H) <sup>+</sup>  |
| 419.13278 | 419.13531 | -6.04     | 1 | 2012.98   | C <sub>20</sub> H <sub>20</sub> F <sub>4</sub> N <sub>2</sub> NaO <sub>2</sub> | (M+Na) <sup>+</sup> |
| 420.13794 | 420.1385  | -1.33     | 1 | 608.65    | C <sub>20</sub> H <sub>20</sub> F <sub>4</sub> N <sub>2</sub> NaO <sub>2</sub> | (M+Na) <sup>+</sup> |

**I-15**

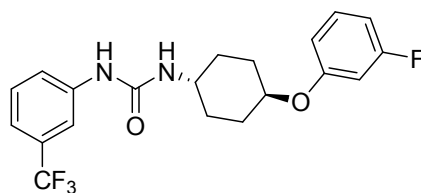

Chemical Formula: C<sub>20</sub>H<sub>20</sub>F<sub>4</sub>N<sub>2</sub>O<sub>2</sub>  
 m/z: 396.15 (100.0%), 397.15 (21.9%), 398.15 (2.8%)

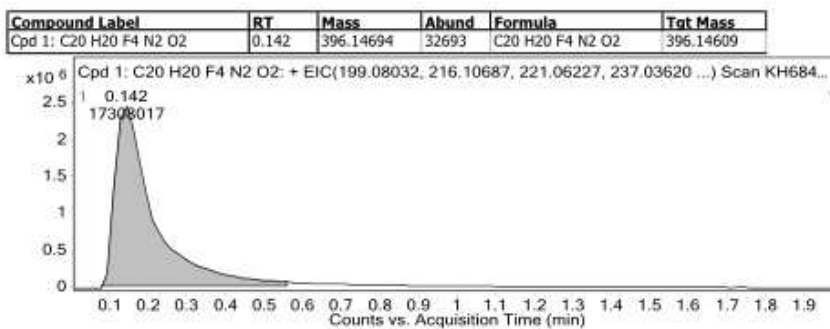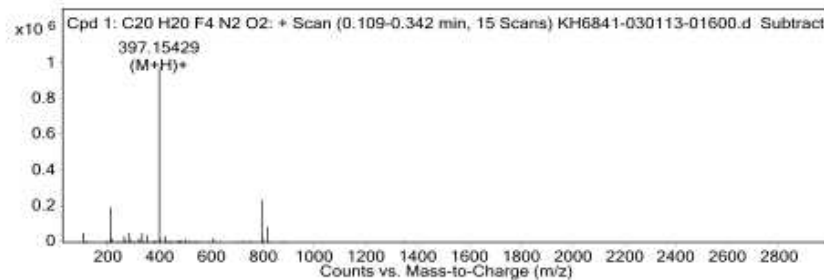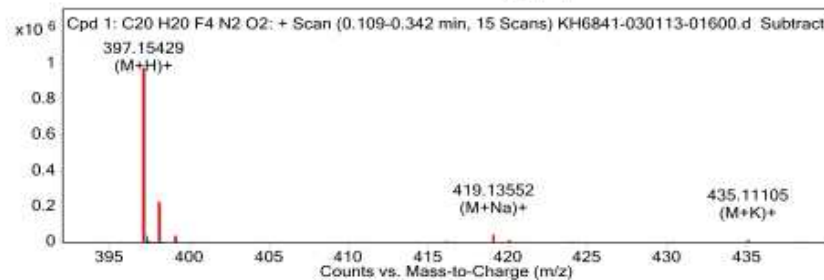

| m/z       | Calc m/z  | Diff(ppm) | z | Abund     | Formula                                                                        | Ion     |
|-----------|-----------|-----------|---|-----------|--------------------------------------------------------------------------------|---------|
| 397.15429 | 397.15337 | 2.33      | 1 | 977477.69 | C <sub>20</sub> H <sub>21</sub> F <sub>4</sub> N <sub>2</sub> O <sub>2</sub>   | (M+H)+  |
| 398.15719 | 398.15655 | 1.59      | 1 | 214577.05 | C <sub>20</sub> H <sub>21</sub> F <sub>4</sub> N <sub>2</sub> O <sub>2</sub>   | (M+H)+  |
| 399.15987 | 399.15942 | 1.12      | 1 | 25948.84  | C <sub>20</sub> H <sub>21</sub> F <sub>4</sub> N <sub>2</sub> O <sub>2</sub>   | (M+H)+  |
| 400.16305 | 400.16215 | 2.27      | 1 | 3228.28   | C <sub>20</sub> H <sub>21</sub> F <sub>4</sub> N <sub>2</sub> O <sub>2</sub>   | (M+H)+  |
| 419.13552 | 419.13531 | 0.5       | 1 | 32693.39  | C <sub>20</sub> H <sub>20</sub> F <sub>4</sub> N <sub>2</sub> NaO <sub>2</sub> | (M+Na)+ |
| 420.13895 | 420.1385  | 1.08      | 1 | 7319.85   | C <sub>20</sub> H <sub>20</sub> F <sub>4</sub> N <sub>2</sub> NaO <sub>2</sub> | (M+Na)+ |
| 421.14318 | 421.14137 | 4.3       | 1 | 1153.46   | C <sub>20</sub> H <sub>20</sub> F <sub>4</sub> N <sub>2</sub> NaO <sub>2</sub> | (M+Na)+ |
| 435.11105 | 435.10925 | 4.15      | 1 | 4112.49   | C <sub>20</sub> H <sub>20</sub> F <sub>4</sub> KN <sub>2</sub> O <sub>2</sub>  | (M+K)+  |
| 436.1099  | 436.11243 | -5.81     | 1 | 1231.01   | C <sub>20</sub> H <sub>20</sub> F <sub>4</sub> KN <sub>2</sub> O <sub>2</sub>  | (M+K)+  |



I-16

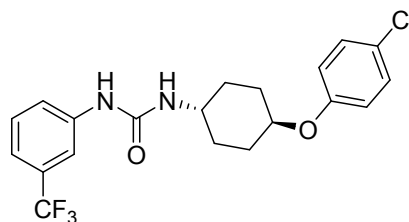

Chemical Formula:  $C_{20}H_{20}ClF_3N_2O_2$   
 m/z: 412.11654 (100.0%), 414.11359 (32.0%)

| Compound Label                                                                        | RT    | Mass      | Abund | Formula                                                                        | Tgt Mass  |
|---------------------------------------------------------------------------------------|-------|-----------|-------|--------------------------------------------------------------------------------|-----------|
| Cpd 1: C <sub>20</sub> H <sub>20</sub> ClF <sub>3</sub> N <sub>2</sub> O <sub>2</sub> | 0.128 | 412.11772 | 2333  | C <sub>20</sub> H <sub>20</sub> ClF <sub>3</sub> N <sub>2</sub> O <sub>2</sub> | 412.11654 |

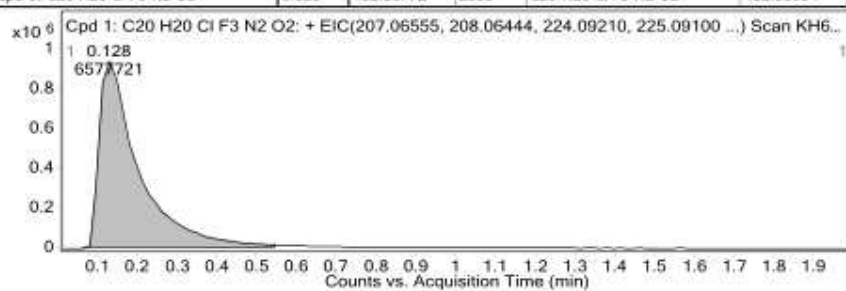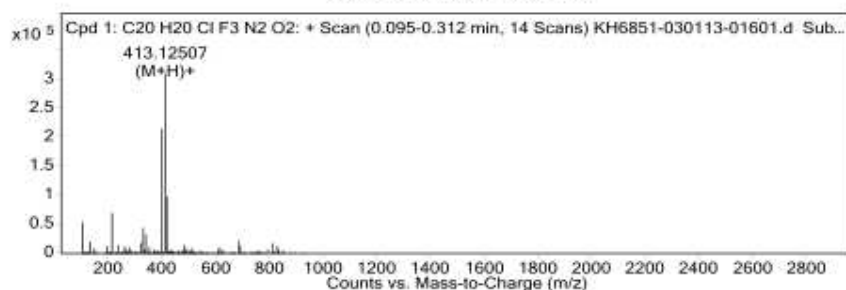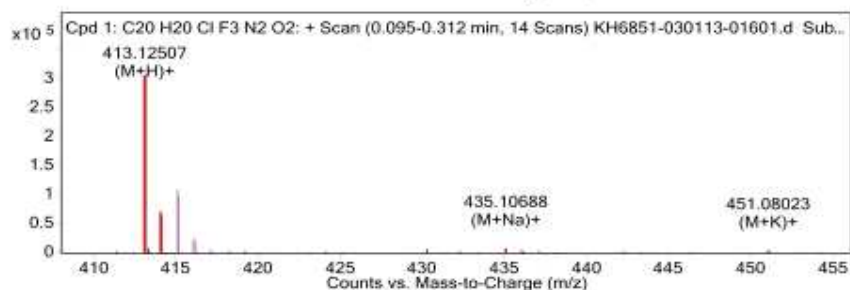

| m/z       | Calc m/z  | Diff(ppm) | z | Abund     | Formula                                                                          | Ion     |
|-----------|-----------|-----------|---|-----------|----------------------------------------------------------------------------------|---------|
| 413.12507 | 413.12382 | 3.04      | 1 | 310100.78 | C <sub>20</sub> H <sub>21</sub> ClF <sub>3</sub> N <sub>2</sub> O <sub>2</sub>   | (M+H)+  |
| 414.12768 | 414.127   | 2.13      | 1 | 64170.29  | C <sub>20</sub> H <sub>21</sub> ClF <sub>3</sub> N <sub>2</sub> O <sub>2</sub>   | (M+H)+  |
| 435.10688 | 435.10576 | 2.58      | 1 | 6200.94   | C <sub>20</sub> H <sub>20</sub> ClF <sub>3</sub> N <sub>2</sub> NaO <sub>2</sub> | (M+Na)+ |
| 436.10867 | 436.10894 | -0.62     | 1 | 1674.95   | C <sub>20</sub> H <sub>20</sub> ClF <sub>3</sub> N <sub>2</sub> NaO <sub>2</sub> | (M+Na)+ |
| 451.08023 | 451.0797  | 1.17      | 1 | 2333.49   | C <sub>20</sub> H <sub>20</sub> ClF <sub>3</sub> KN <sub>2</sub> O <sub>2</sub>  | (M+K)+  |
| 452.08295 | 452.08288 | 0.16      | 1 | 630.5     | C <sub>20</sub> H <sub>20</sub> ClF <sub>3</sub> KN <sub>2</sub> O <sub>2</sub>  | (M+K)+  |

**I-17:**

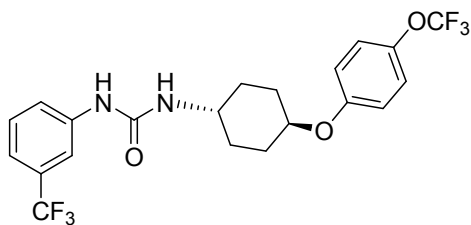

Chemical Formula: C<sub>21</sub>H<sub>20</sub>F<sub>6</sub>N<sub>2</sub>O<sub>3</sub>  
Exact Mass: 462.14

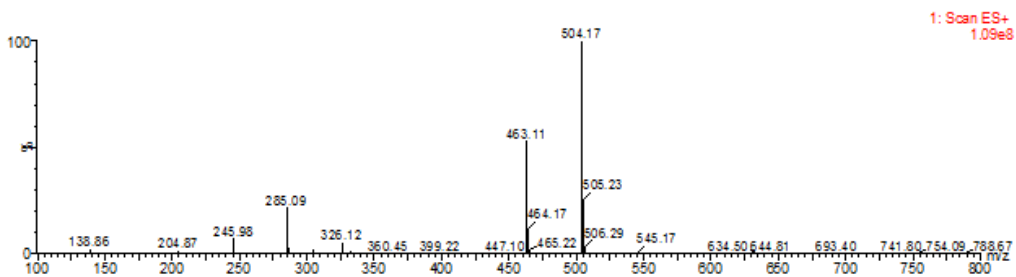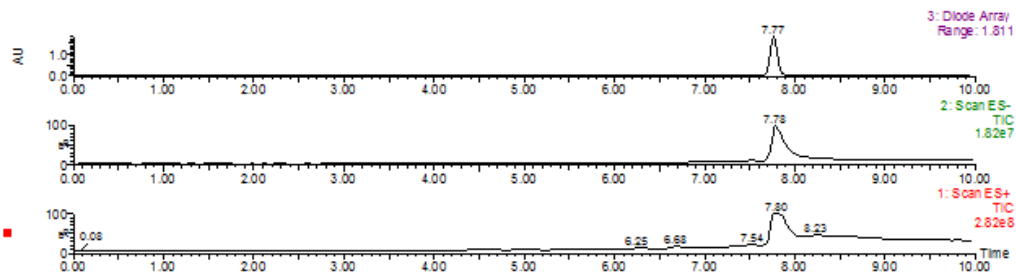

**I-18:**

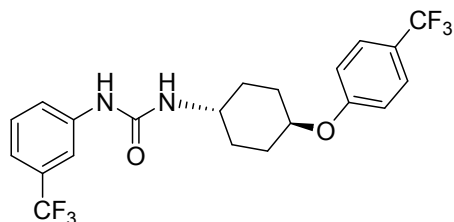

Chemical Formula: C<sub>21</sub>H<sub>20</sub>F<sub>6</sub>N<sub>2</sub>O<sub>2</sub>  
m/z: 446.14290

| Compound Label                                                                      | RT    | Mass      | Abund  | Formula                                                                      | Tgt Mass |
|-------------------------------------------------------------------------------------|-------|-----------|--------|------------------------------------------------------------------------------|----------|
| Cpd 1: C <sub>21</sub> H <sub>20</sub> F <sub>6</sub> N <sub>2</sub> O <sub>2</sub> | 0.188 | 446.14388 | 355351 | C <sub>21</sub> H <sub>20</sub> F <sub>6</sub> N <sub>2</sub> O <sub>2</sub> | 446.1429 |

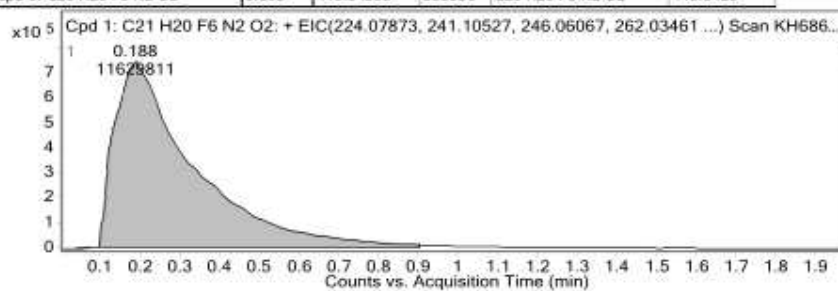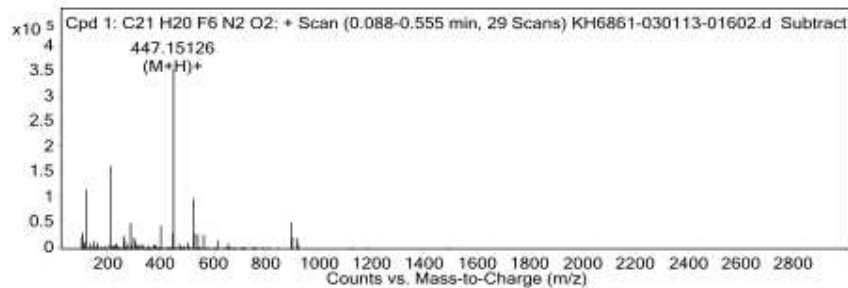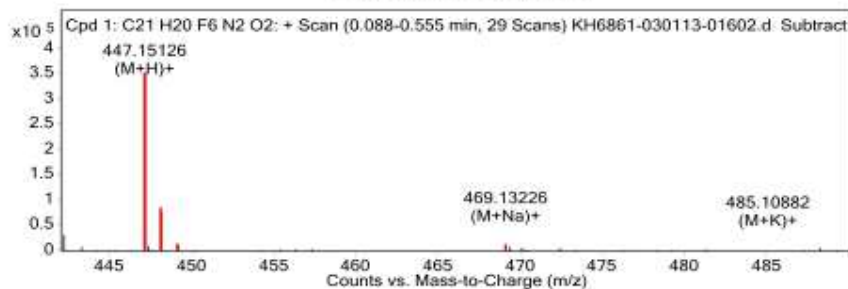

| m/z       | Calc m/z  | Diff(ppm) | z | Abund     | Formula                                                                        | Ion                               |
|-----------|-----------|-----------|---|-----------|--------------------------------------------------------------------------------|-----------------------------------|
| 447.15126 | 447.15017 | 2.44      | 1 | 355351.28 | C <sub>21</sub> H <sub>21</sub> F <sub>6</sub> N <sub>2</sub> O <sub>2</sub>   | (M+H) <sup>+</sup>                |
| 448.15389 | 448.15337 | 1.17      | 1 | 77688.22  | C <sub>21</sub> H <sub>21</sub> F <sub>6</sub> N <sub>2</sub> O <sub>2</sub>   | (M+H) <sup>+</sup>                |
| 449.15752 | 449.15627 | 2.78      | 1 | 10099.43  | C <sub>21</sub> H <sub>21</sub> F <sub>6</sub> N <sub>2</sub> O <sub>2</sub>   | (M+H) <sup>+</sup>                |
| 450.15844 | 450.15902 | -1.3      | 1 | 1145.79   | C <sub>21</sub> H <sub>21</sub> F <sub>6</sub> N <sub>2</sub> O <sub>2</sub>   | (M+H) <sup>+</sup>                |
| 464.17712 | 464.17672 | 0.85      | 1 | 116.16    | C <sub>21</sub> H <sub>24</sub> F <sub>6</sub> N <sub>3</sub> O <sub>2</sub>   | (M+NH <sub>4</sub> ) <sup>+</sup> |
| 469.13226 | 469.13212 | 0.31      | 1 | 10118.34  | C <sub>21</sub> H <sub>20</sub> F <sub>6</sub> N <sub>2</sub> NaO <sub>2</sub> | (M+Na) <sup>+</sup>               |
| 470.13829 | 470.13531 | 6.35      | 1 | 2563.38   | C <sub>21</sub> H <sub>20</sub> F <sub>6</sub> N <sub>2</sub> NaO <sub>2</sub> | (M+Na) <sup>+</sup>               |
| 471.139   | 471.13821 | 1.67      | 1 | 475.37    | C <sub>21</sub> H <sub>20</sub> F <sub>6</sub> N <sub>2</sub> NaO <sub>2</sub> | (M+Na) <sup>+</sup>               |
| 485.10882 | 485.10606 | 5.69      | 1 | 1012.07   | C <sub>21</sub> H <sub>20</sub> F <sub>6</sub> KN <sub>2</sub> O <sub>2</sub>  | (M+K) <sup>+</sup>                |

**I-19:**

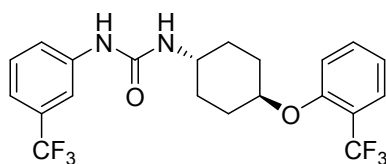

Chemical Formula: C<sub>21</sub>H<sub>20</sub>F<sub>6</sub>N<sub>2</sub>O<sub>2</sub>  
Exact Mass: 446.14290

| Compound Label          | RT    | Mass      | Abund | Formula          | Tgt Mass |
|-------------------------|-------|-----------|-------|------------------|----------|
| Cpd 1: C21 H20 F6 N2 O2 | 0.115 | 446.14414 | 69682 | C21 H20 F6 N2 O2 | 446.1429 |

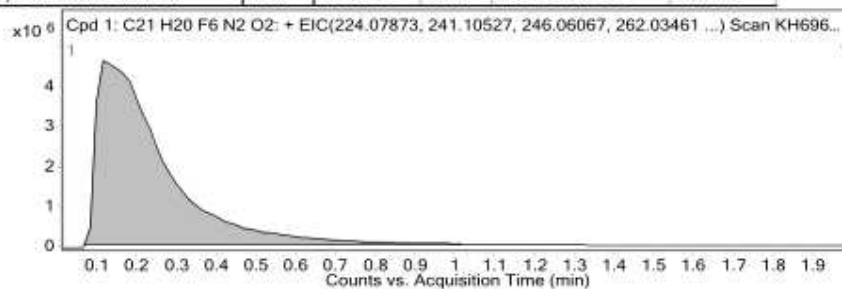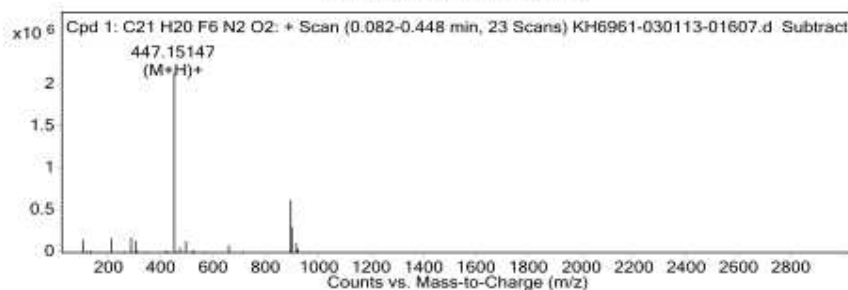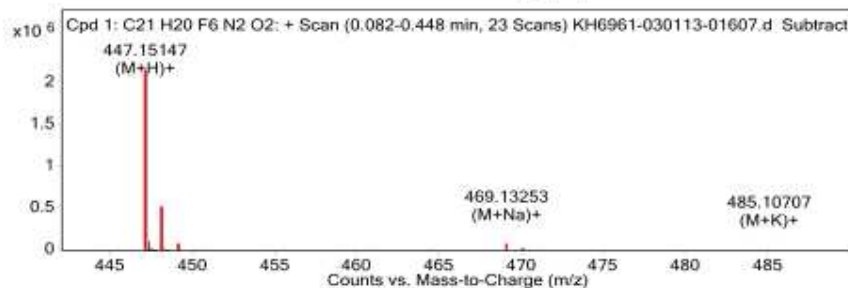

| m/z       | Calc m/z  | Diff(ppm) | z | Abund    | Formula        | Ion     |
|-----------|-----------|-----------|---|----------|----------------|---------|
| 447.15147 | 447.15017 | 2.9       | 1 | 2142253  | C21H21F6N2O2   | (M+H)+  |
| 448.15462 | 448.15337 | 2.79      | 1 | 507455   | C21H21F6N2O2   | (M+H)+  |
| 449.15696 | 449.15627 | 1.53      | 1 | 64374.13 | C21H21F6N2O2   | (M+H)+  |
| 450.15957 | 450.15902 | 1.22      | 1 | 7699.52  | C21H21F6N2O2   | (M+H)+  |
| 469.13253 | 469.13212 | 0.89      | 1 | 69682.2  | C21H20F6N2NaO2 | (M+Na)+ |
| 470.13573 | 470.13531 | 0.9       | 1 | 16057.05 | C21H20F6N2NaO2 | (M+Na)+ |
| 471.13433 | 471.13821 | -8.24     | 1 | 2203.28  | C21H20F6N2NaO2 | (M+Na)+ |
| 472.12687 | 472.14096 | -29.83    | 1 | 89.38    | C21H20F6N2NaO2 | (M+Na)+ |
| 485.10707 | 485.10606 | 2.08      | 1 | 3086.53  | C21H20F6KN2O2  | (M+K)+  |
| 486.11164 | 486.10925 | 4.92      | 1 | 858.75   | C21H20F6KN2O2  | (M+K)+  |

**I-20**

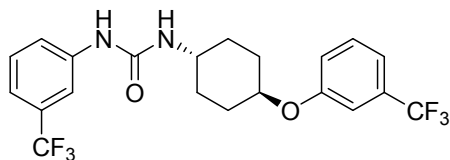

Chemical Formula: C<sub>21</sub>H<sub>20</sub>F<sub>6</sub>N<sub>2</sub>O<sub>2</sub>  
 m/z: 446.1429 (100.0%), 447.1463 (22.7%), 448.1496 (2.5%)

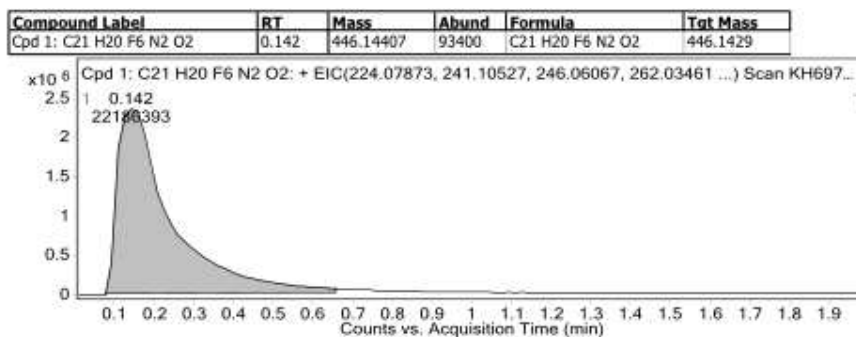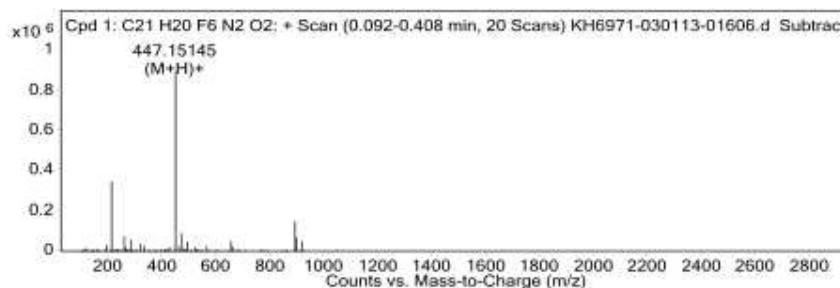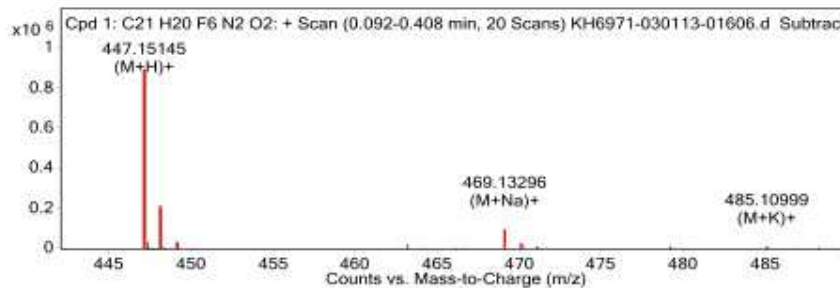

| m/z       | Calc m/z  | Diff(ppm) | z | Abund     | Formula                                                                        | Ion                 |
|-----------|-----------|-----------|---|-----------|--------------------------------------------------------------------------------|---------------------|
| 447.15145 | 447.15017 | 2.86      | 1 | 895293.13 | C <sub>21</sub> H <sub>21</sub> F <sub>6</sub> N <sub>2</sub> O <sub>2</sub>   | (M+H) <sup>+</sup>  |
| 448.15428 | 448.15337 | 2.05      | 1 | 204839.61 | C <sub>21</sub> H <sub>21</sub> F <sub>6</sub> N <sub>2</sub> O <sub>2</sub>   | (M+H) <sup>+</sup>  |
| 449.15674 | 449.15627 | 1.06      | 1 | 26027.81  | C <sub>21</sub> H <sub>21</sub> F <sub>6</sub> N <sub>2</sub> O <sub>2</sub>   | (M+H) <sup>+</sup>  |
| 450.15899 | 450.15902 | -0.06     | 1 | 3311.36   | C <sub>21</sub> H <sub>21</sub> F <sub>6</sub> N <sub>2</sub> O <sub>2</sub>   | (M+H) <sup>+</sup>  |
| 469.13296 | 469.13212 | 1.8       | 1 | 93400.25  | C <sub>21</sub> H <sub>20</sub> F <sub>6</sub> N <sub>2</sub> NaO <sub>2</sub> | (M+Na) <sup>+</sup> |
| 470.13576 | 470.13531 | 0.95      | 1 | 20852.15  | C <sub>21</sub> H <sub>20</sub> F <sub>6</sub> N <sub>2</sub> NaO <sub>2</sub> | (M+Na) <sup>+</sup> |
| 471.13512 | 471.13821 | -6.55     | 1 | 2840.53   | C <sub>21</sub> H <sub>20</sub> F <sub>6</sub> N <sub>2</sub> NaO <sub>2</sub> | (M+Na) <sup>+</sup> |
| 472.14521 | 472.14096 | 8.99      | 1 | 687.08    | C <sub>21</sub> H <sub>20</sub> F <sub>6</sub> N <sub>2</sub> NaO <sub>2</sub> | (M+Na) <sup>+</sup> |
| 485.10999 | 485.10606 | 8.12      | 1 | 6114.42   | C <sub>21</sub> H <sub>20</sub> F <sub>6</sub> KN <sub>2</sub> O <sub>2</sub>  | (M+K) <sup>+</sup>  |
| 486.11795 | 486.10925 | 17.92     | 1 | 1749.07   | C <sub>21</sub> H <sub>20</sub> F <sub>6</sub> KN <sub>2</sub> O <sub>2</sub>  | (M+K) <sup>+</sup>  |

**III-1**

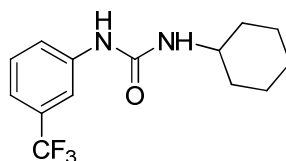

Chemical Formula: C<sub>14</sub>H<sub>17</sub>F<sub>3</sub>N<sub>2</sub>O  
 m/z: 286.13 (100.0%), 287.13 (15.9%), 288.14 (1.1%)

| Compound Label         | RT    | Mass      | Abund | Formula         | Tgt Mass |
|------------------------|-------|-----------|-------|-----------------|----------|
| Cpd 1: C14 H17 F3 N2 O | 0.146 | 286.12951 | 12043 | C14 H17 F3 N2 O | 286.1293 |

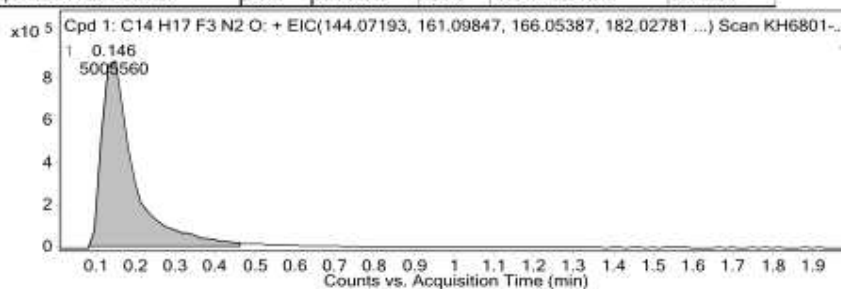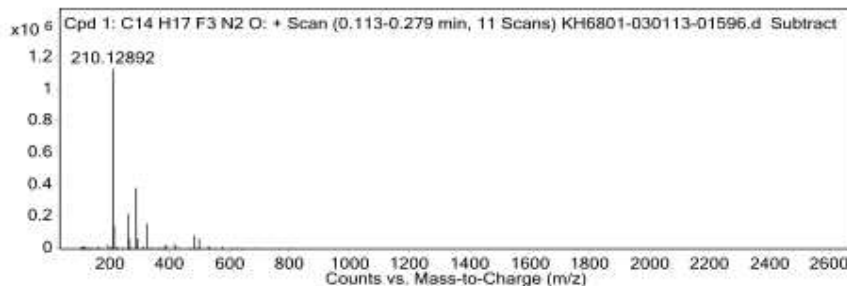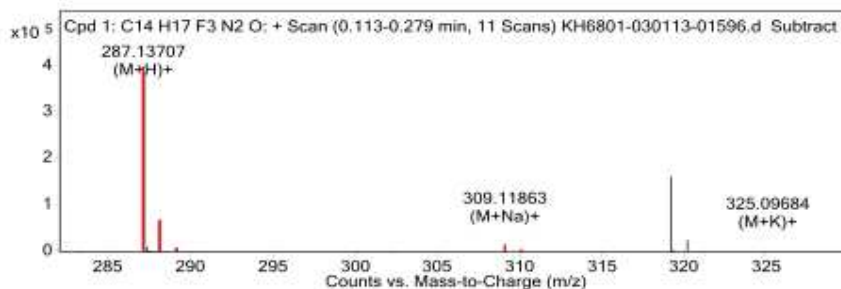

| m/z       | Calc m/z  | Diff(ppm) | z | Abund      | Formula       | Ion     |
|-----------|-----------|-----------|---|------------|---------------|---------|
| 210.12892 |           |           |   | 1128544.75 |               |         |
| 287.13707 | 287.13657 | 1.72      | 1 | 385535.19  | C14H18F3N2O   | (M+H)+  |
| 288.13862 | 288.13968 | -3.68     | 1 | 69285.71   | C14H18F3N2O   | (M+H)+  |
| 289.1398  | 289.14249 | -9.31     | 1 | 6882.78    | C14H18F3N2O   | (M+H)+  |
| 290.14293 | 290.14513 | -7.6      | 1 | 1163.47    | C14H18F3N2O   | (M+H)+  |
| 309.11863 | 309.11852 | 0.35      | 1 | 12042.55   | C14H17F3N2NaO | (M+Na)+ |
| 310.12218 | 310.12162 | 1.78      | 1 | 2226.52    | C14H17F3N2NaO | (M+Na)+ |
| 311.12779 | 311.12443 | 10.8      | 1 | 248.71     | C14H17F3N2NaO | (M+Na)+ |
| 325.09684 | 325.09246 | 13.49     | 1 | 145.31     | C14H17F3KN2O  | (M+K)+  |

**III-2**

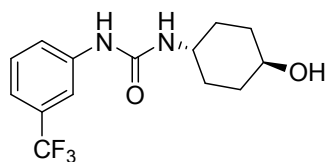

Chemical Formula: C<sub>14</sub>H<sub>17</sub>F<sub>3</sub>N<sub>2</sub>O<sub>2</sub>  
 m/z: 302.12 (100.0%), 303.13 (15.4%), 304.13 (1.5%)

| Compound Label          | RT    | Mass      | Abund   | Formula          | Tot Mass  |
|-------------------------|-------|-----------|---------|------------------|-----------|
| Cpd 1: C14 H17 F3 N2 O2 | 0.202 | 302.12499 | 1562579 | C14 H17 F3 N2 O2 | 302.12421 |

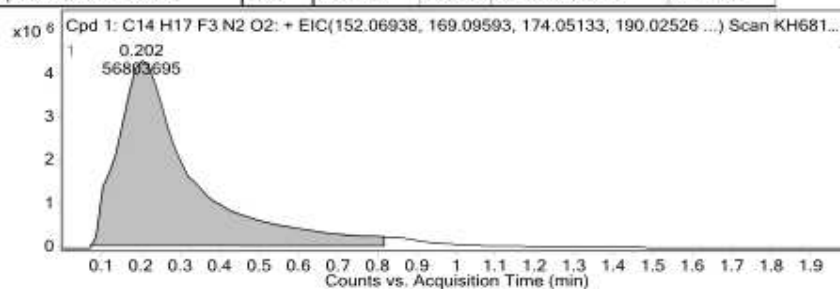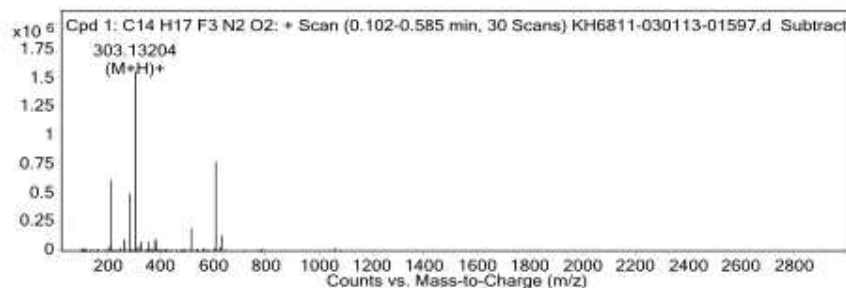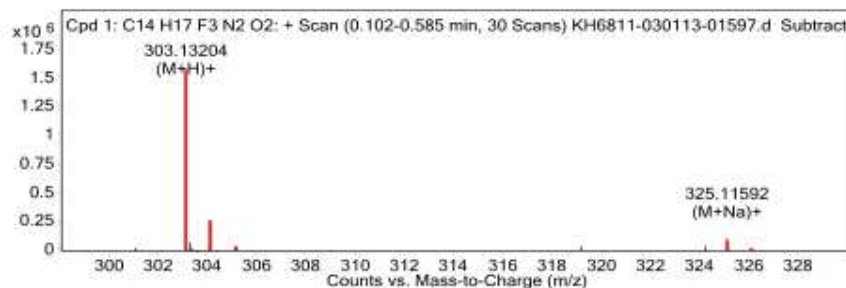

| m/z       | Calc m/z  | Diff(ppm) | z | Abund      | Formula        | Ion     |
|-----------|-----------|-----------|---|------------|----------------|---------|
| 303.13204 | 303.13149 | 1.82      | 1 | 1562579.13 | C14H18F3N2O2   | (M+H)+  |
| 304.13505 | 304.1346  | 1.49      | 1 | 252341.16  | C14H18F3N2O2   | (M+H)+  |
| 305.14506 | 305.1372  | 25.78     | 1 | 33592.56   | C14H18F3N2O2   | (M+H)+  |
| 306.15229 | 306.13973 | 41.03     | 1 | 3734.81    | C14H18F3N2O2   | (M+H)+  |
| 325.11592 | 325.11343 | 7.64      | 1 | 80122.33   | C14H17F3N2NaO2 | (M+Na)+ |
| 326.11845 | 326.11654 | 5.86      | 1 | 12455.17   | C14H17F3N2NaO2 | (M+Na)+ |
| 327.1209  | 327.11914 | 5.39      | 1 | 1455.75    | C14H17F3N2NaO2 | (M+Na)+ |

**III-3:**

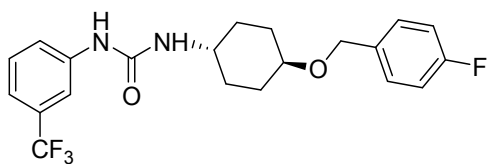

Chemical Formula:  $C_{21}H_{22}F_4N_2O_2$   
Exact Mass: 410.16174

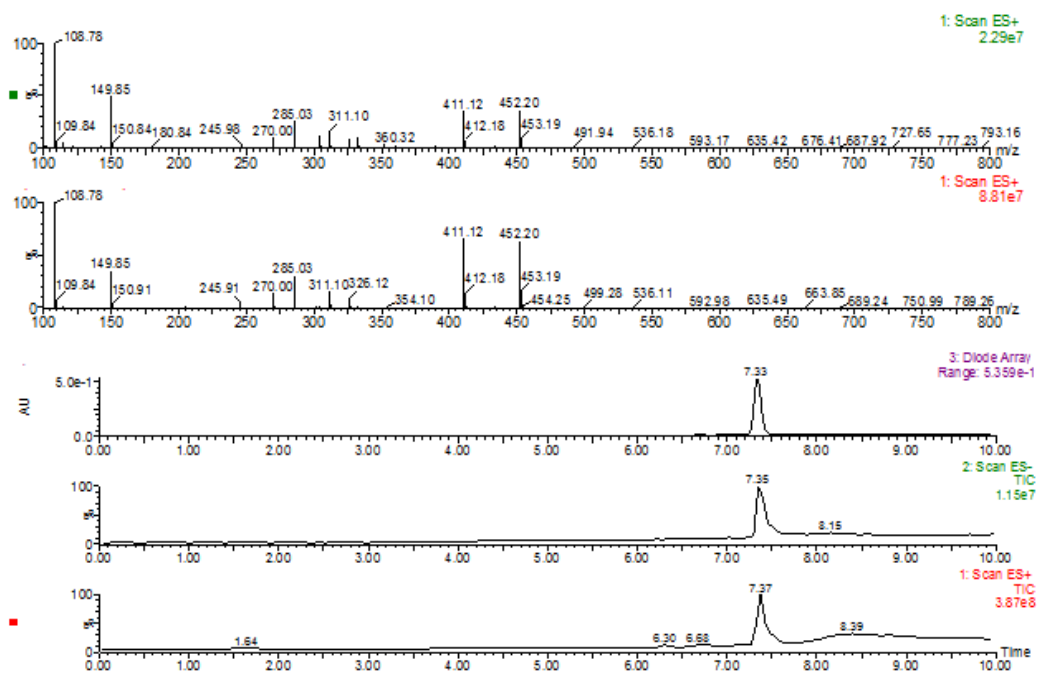



**III-4:**

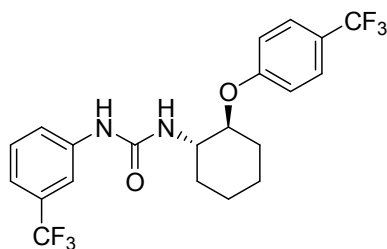

Chemical Formula:  $C_{21}H_{20}F_6N_2O_2$   
 m/z: 446.1429 (100.0%), 447.1463 (22.7%), 448.1496 (2.5%)

| Compound Label          | RT    | Mass      | Abund  | Formula          | Tot Mass |
|-------------------------|-------|-----------|--------|------------------|----------|
| Cpd 1: C21 H20 F6 N2 O2 | 0.163 | 446.14379 | 264596 | C21 H20 F6 N2 O2 | 446.1429 |

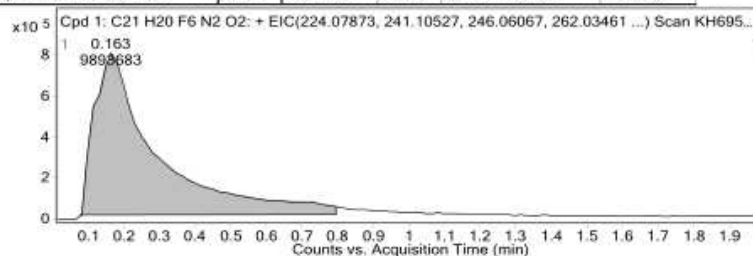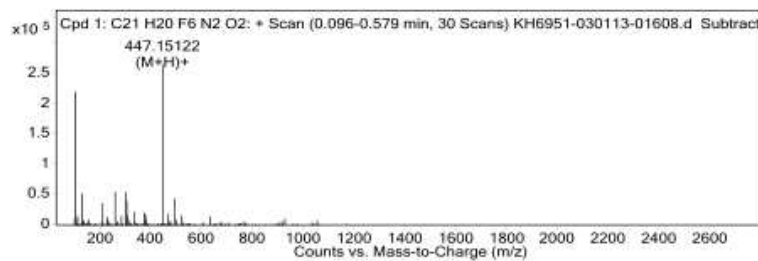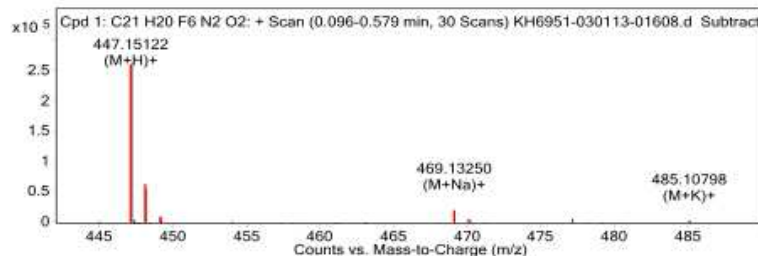

| $m/z$     | Calc $m/z$ | Diff(ppm) | z | Abund     | Formula        | Ion                     |
|-----------|------------|-----------|---|-----------|----------------|-------------------------|
| 447.15122 | 447.15017  | 2.35      | 1 | 264596.22 | C21H21F6N2O2   | ( $M+H$ ) <sup>+</sup>  |
| 448.15389 | 448.15337  | 1.17      | 1 | 57477.33  | C21H21F6N2O2   | ( $M+H$ ) <sup>+</sup>  |
| 449.15673 | 449.15627  | 1.04      | 1 | 7478.51   | C21H21F6N2O2   | ( $M+H$ ) <sup>+</sup>  |
| 450.15916 | 450.15902  | 0.32      | 1 | 1230.6    | C21H21F6N2O2   | ( $M+H$ ) <sup>+</sup>  |
| 469.1325  | 469.13212  | 0.81      | 1 | 19527.89  | C21H20F6N2NaO2 | ( $M+Na$ ) <sup>+</sup> |
| 470.13622 | 470.13531  | 1.94      | 1 | 4643.88   | C21H20F6N2NaO2 | ( $M+Na$ ) <sup>+</sup> |
| 471.12403 | 471.13821  | -30.09    | 1 | 632.95    | C21H20F6N2NaO2 | ( $M+Na$ ) <sup>+</sup> |
| 472.13839 | 472.14096  | -5.44     | 1 | 88.47     | C21H20F6N2NaO2 | ( $M+Na$ ) <sup>+</sup> |
| 485.10798 | 485.10606  | 3.96      | 1 | 1427.72   | C21H20F6KN2O2  | ( $M+K$ ) <sup>+</sup>  |
| 486.11266 | 486.10925  | 7.03      | 1 | 458.79    | C21H20F6KN2O2  | ( $M+K$ ) <sup>+</sup>  |

III-5

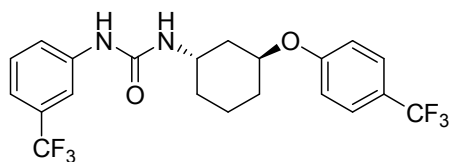

Chemical Formula: C<sub>21</sub>H<sub>20</sub>F<sub>6</sub>N<sub>2</sub>O<sub>2</sub>  
 m/z: 446.1429 (100.0%), 447.1463 (22.7%), 448.1496 (2.5%)

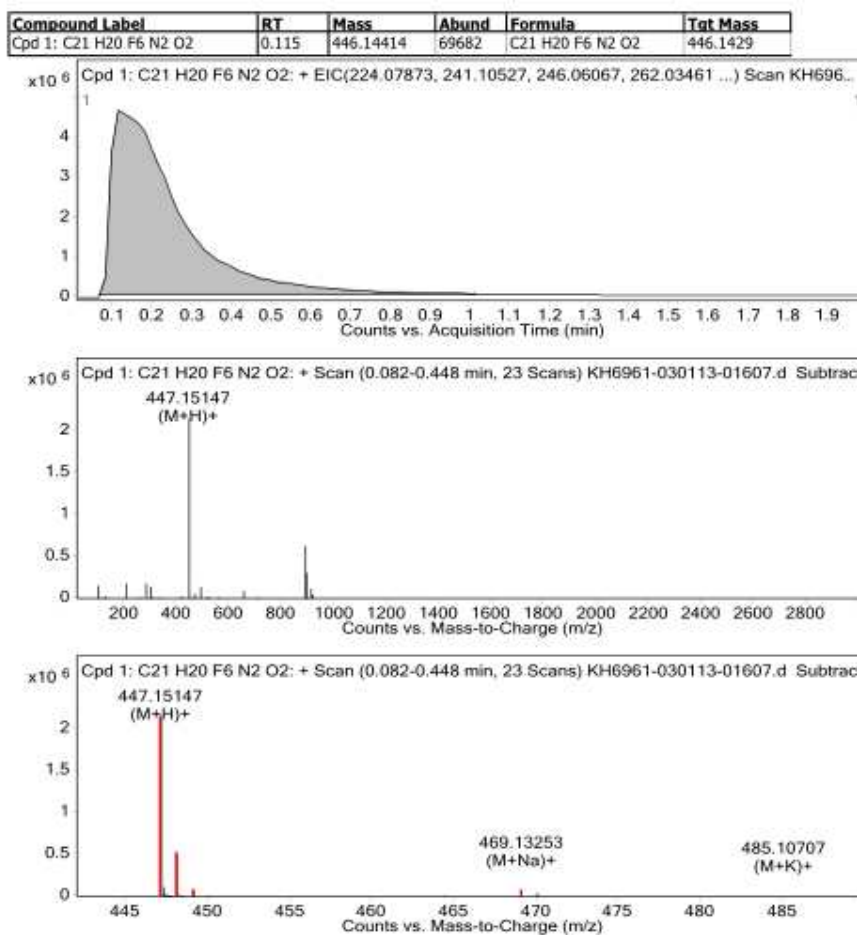

| m/z       | Calc m/z  | Diff(ppm) | z | Abund    | Formula                                                                        | Ion     |
|-----------|-----------|-----------|---|----------|--------------------------------------------------------------------------------|---------|
| 447.15147 | 447.15017 | 2.9       | 1 | 2142253  | C <sub>21</sub> H <sub>21</sub> F <sub>6</sub> N <sub>2</sub> O <sub>2</sub>   | (M+H)+  |
| 448.15462 | 448.15337 | 2.79      | 1 | 507455   | C <sub>21</sub> H <sub>21</sub> F <sub>6</sub> N <sub>2</sub> O <sub>2</sub>   | (M+H)+  |
| 449.15696 | 449.15627 | 1.53      | 1 | 64374.13 | C <sub>21</sub> H <sub>21</sub> F <sub>6</sub> N <sub>2</sub> O <sub>2</sub>   | (M+H)+  |
| 450.15957 | 450.15902 | 1.22      | 1 | 7699.52  | C <sub>21</sub> H <sub>21</sub> F <sub>6</sub> N <sub>2</sub> O <sub>2</sub>   | (M+H)+  |
| 469.13253 | 469.13212 | 0.89      | 1 | 69682.2  | C <sub>21</sub> H <sub>20</sub> F <sub>6</sub> N <sub>2</sub> NaO <sub>2</sub> | (M+Na)+ |
| 470.13573 | 470.13531 | 0.9       | 1 | 16057.05 | C <sub>21</sub> H <sub>20</sub> F <sub>6</sub> N <sub>2</sub> NaO <sub>2</sub> | (M+Na)+ |
| 471.13433 | 471.13821 | -8.24     | 1 | 2203.28  | C <sub>21</sub> H <sub>20</sub> F <sub>6</sub> N <sub>2</sub> NaO <sub>2</sub> | (M+Na)+ |
| 472.12687 | 472.14096 | -29.83    | 1 | 89.38    | C <sub>21</sub> H <sub>20</sub> F <sub>6</sub> N <sub>2</sub> NaO <sub>2</sub> | (M+Na)+ |
| 485.10707 | 485.10606 | 2.08      | 1 | 3086.53  | C <sub>21</sub> H <sub>20</sub> F <sub>6</sub> KN <sub>2</sub> O <sub>2</sub>  | (M+K)+  |
| 486.11164 | 486.10925 | 4.92      | 1 | 858.75   | C <sub>21</sub> H <sub>20</sub> F <sub>6</sub> KN <sub>2</sub> O <sub>2</sub>  | (M+K)+  |

## VI. HPLC purity confirmation data for compounds **I-14-20** and **III-1-5**.

The compounds monitored at 254 nanometers with a reversed phase column (column XBridge BEH130 C18, 4.6 x 100 mm, 5  $\mu$ m particle size) using a Waters Alliance 2695 with the binary system water/acetonitrile containing 0.1 % of trifluoroacetic acid (TFA) as eluent running with a gradient increase of acetonitrile from 0 to 100% in 25 min at a flow rate of 1 mL/min. Then 5 min wash at 100% acetonitrile.

### **I-14:**

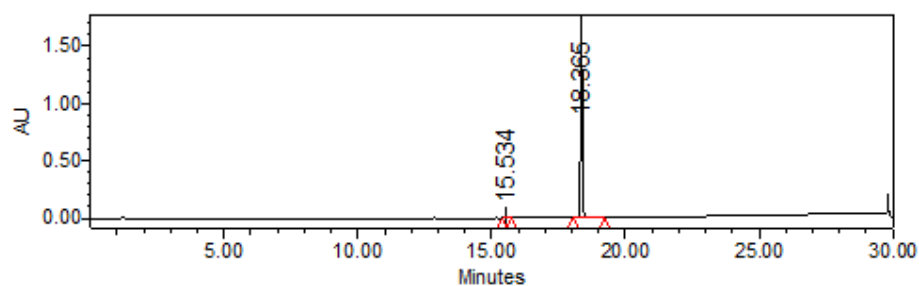

|   | Retention Time | Area    | % Area | Height  |
|---|----------------|---------|--------|---------|
| 1 | 15.534         | 47849   | 0.54   | 10146   |
| 2 | 18.365         | 8878632 | 99.46  | 1656798 |

### **I-15:**

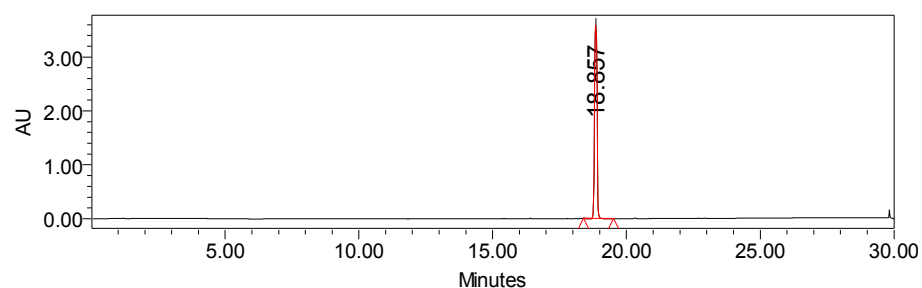

|   | Retention Time | Area     | % Area | Height  |
|---|----------------|----------|--------|---------|
| 1 | 18.857         | 23623602 | 100.00 | 3590094 |

**I-16:**

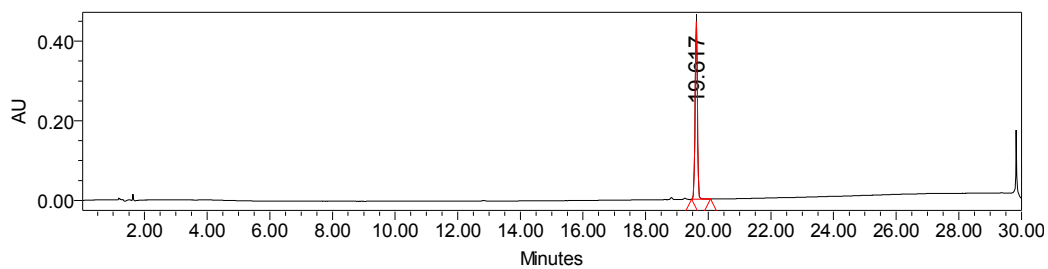

|   | Retention Time | Area    | % Area | Height |
|---|----------------|---------|--------|--------|
| 1 | 19.617         | 2291443 | 100.00 | 440112 |

**I-17:**

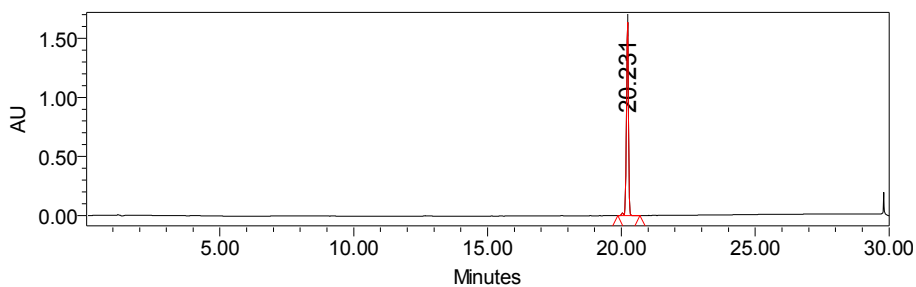

|   | Retention Time | Area    | % Area | Height  |
|---|----------------|---------|--------|---------|
| 1 | 20.231         | 8438792 | 100.00 | 1615064 |

**I-18:**

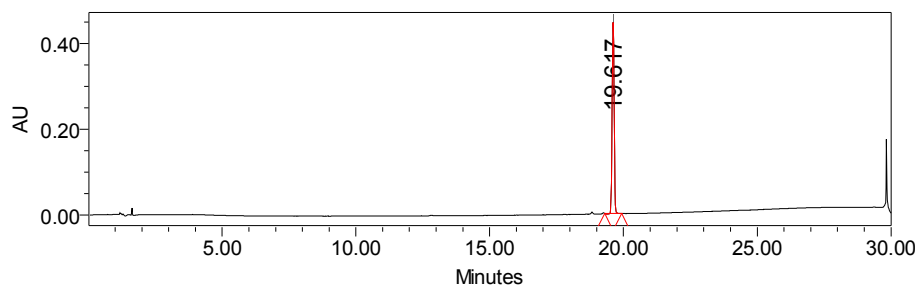

|   | Retention Time | Area    | % Area | Height |
|---|----------------|---------|--------|--------|
| 1 | 19.617         | 2280164 | 100.00 | 439224 |

**I-19:**

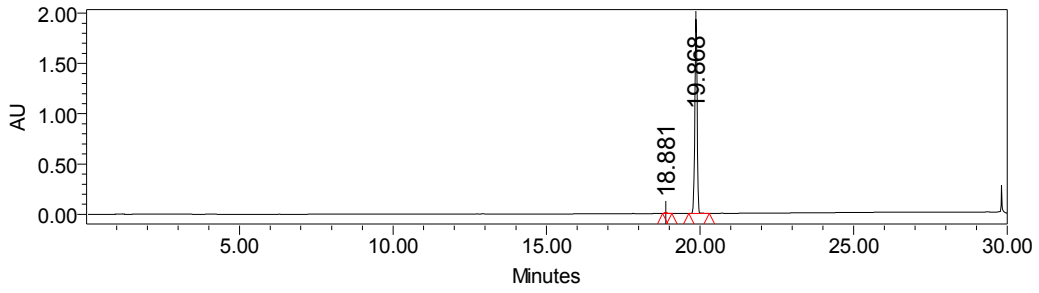

|   | Retention Time | Area    | % Area | Height  |
|---|----------------|---------|--------|---------|
| 1 | 18.881         | 56315   | 0.57   | 11249   |
| 2 | 19.868         | 9888316 | 99.43  | 1905711 |

**I-20:**

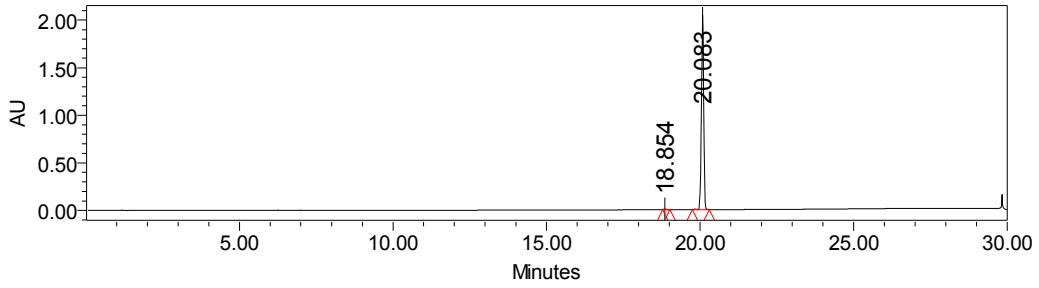

|   | Retention Time | Area     | % Area | Height  |
|---|----------------|----------|--------|---------|
| 1 | 18.854         | 31165    | 0.29   | 6716    |
| 2 | 20.083         | 10594192 | 99.71  | 2018778 |

**III-1:**

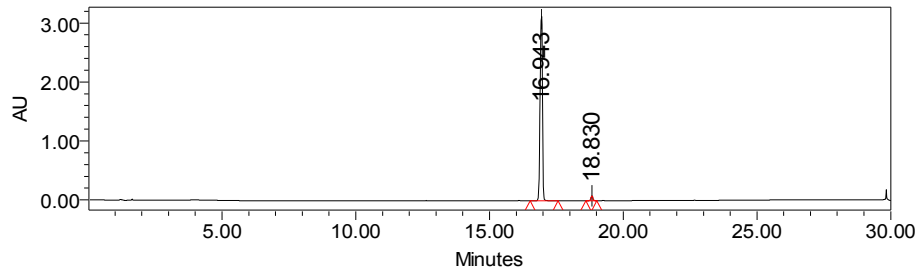

|   | Retention Time | Area     | % Area | Height  |
|---|----------------|----------|--------|---------|
| 1 | 16.943         | 20328440 | 98.08  | 3201563 |
| 2 | 18.830         | 398995   | 1.92   | 79956   |

**III-2:**

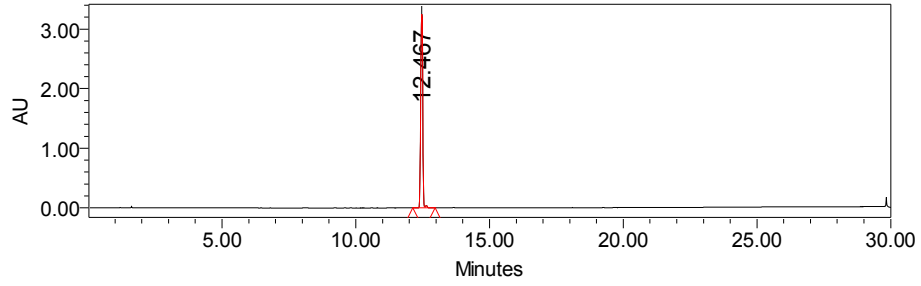

|   | Retention Time | Area     | % Area | Height  |
|---|----------------|----------|--------|---------|
| 1 | 12.467         | 17231425 | 100.00 | 3329693 |

**III-3:**

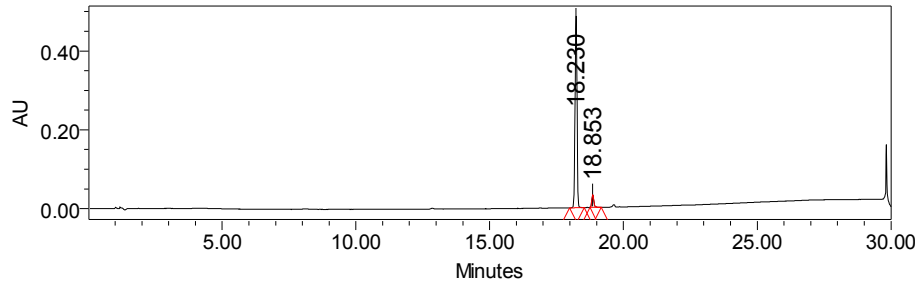

|   | Retention Time | Area    | % Area | Height |
|---|----------------|---------|--------|--------|
| 1 | 18.230         | 2409731 | 95.57  | 480771 |
| 2 | 18.853         | 165630  | 4.43   | 31614  |

**III-4:**

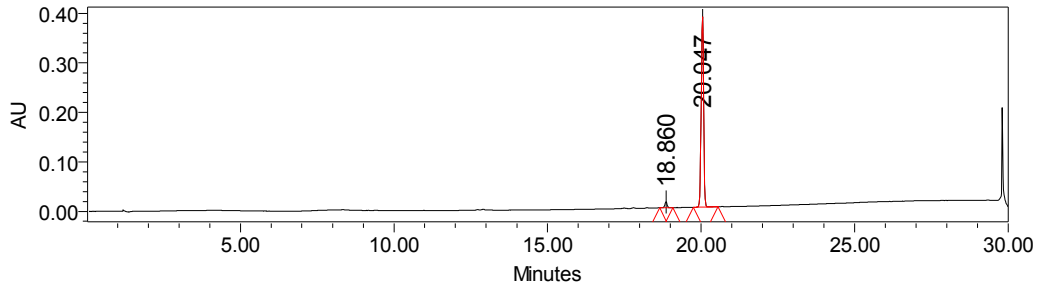

|   | Retention Time | Area    | % Area | Height |
|---|----------------|---------|--------|--------|
| 1 | 18.860         | 62768   | 2.88   | 11825  |
| 2 | 20.047         | 2114743 | 97.12  | 380954 |

**III-5:**

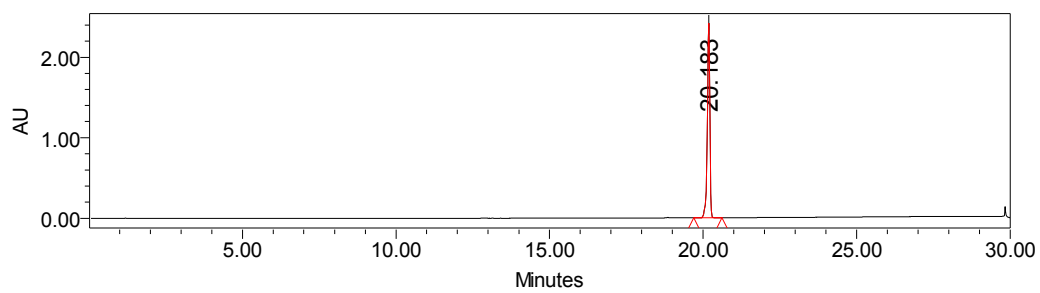

|   | Retention Time | Area     | % Area | Height  |
|---|----------------|----------|--------|---------|
| 1 | 20.183         | 13748186 | 100.00 | 2403688 |
